# Supplementary material for: Iridium-catalyzed asymmetric trans-selective hydrogenation of 1,3-disubstituted isoquinolines
Source: Royal Society of Chemistry journal article supplement (doi:10.1039/d1sc06729j), 2022-01-01
Supplement: d1sc06729j1.pdf [file d1sc06729j1.pdf]

**Iridium-Catalyzed Asymmetric *trans*-Selective Hydrogenation  
of 1,3-Disubstituted Isoquinolines**

Alexia N. Kim, Aurapat Ngamnithiporn, Michael D. Bartberger, and Brian M. Stoltz\*

*Warren and Katharine Schlinger Laboratory of Chemistry and Chemical Engineering, Division  
of Chemistry and Chemical Engineering, California Institute of Technology, Pasadena,  
California 91125  
stoltz@caltech.edu*

**Table of Contents:**

|                                                                                           |              |
|-------------------------------------------------------------------------------------------|--------------|
| <b>Materials and Methods</b> .....                                                        | <b>SI 2</b>  |
| <b>List of Abbreviations</b> .....                                                        | <b>SI 3</b>  |
| <b>Syntheses of Hydroxymethyl 1,3-Disubstituted Isoquinolines</b> .....                   | <b>SI 3</b>  |
| <b>Syntheses of 1,3-Disubstituted Isoquinolines with Different Directing Groups</b> ..... | <b>SI 15</b> |
| <b>General Procedure for Hydrogenation Reactions</b> .....                                | <b>SI 18</b> |
| <b>Experimental Procedure and Characterization Data for Product Transformations</b> ..... | <b>SI 28</b> |
| <b>Additional Optimization Results</b> .....                                              | <b>SI 29</b> |
| <b>Deuterium Experiments</b> .....                                                        | <b>SI 30</b> |
| <b>Proposed Catalytic Cycle</b> .....                                                     | <b>SI 32</b> |
| <b>Determination of Enantiomeric Excess</b> .....                                         | <b>SI 33</b> |
| <b>Crystal Structure Analysis of Product 5a (sample No.: V21097)</b> .....                | <b>SI 36</b> |
| <b>Determination of Relative and Absolute Configuration of 2a by VCD</b> .....            | <b>SI 44</b> |
| <b>References</b> .....                                                                   | <b>SI 46</b> |
| <b>NMR and IR Spectra of New Compounds</b> .....                                          | <b>SI 47</b> |
| <b>SFC Traces of Racemic and Enantioenriched Compounds</b> .....                          | <b>SI 94</b> |

## Materials and Methods

Unless otherwise stated, reactions were performed in flame-dried glassware under an argon or nitrogen atmosphere using dry, deoxygenated solvents. Solvents were dried by passage through an activated alumina column under argon.<sup>1</sup> Reaction progress was monitored by thin-layer chromatography (TLC) or Agilent 1290 UHPLC-MS. TLC was performed using E. Merck silica gel 60 F254 precoated glass plates (0.25 mm) and visualized by UV fluorescence quenching, with KMnO<sub>4</sub> or *p*-anisaldehyde staining. Silicycle SiliaFlash® P60 Academic Silica gel (particle size 40–63 μm) was used for flash chromatography. <sup>1</sup>H NMR spectra were recorded on Bruker 400 MHz or Varian Mercury 300 MHz spectrometers and are reported relative to residual CHCl<sub>3</sub> (δ 7.26 ppm). <sup>13</sup>C NMR spectra were recorded on Bruker 400 MHz spectrometer (100 MHz) and are reported relative to CHCl<sub>3</sub> (δ 77.16 ppm). <sup>19</sup>F NMR spectra were recorded on Varian Mercury 300 MHz spectrometer (282 MHz). Data for <sup>1</sup>H NMR are reported as follows: chemical shift (δ ppm) (multiplicity, coupling constant (Hz), integration). Multiplicities are reported as follows: s = singlet, d = doublet, t = triplet, q = quartet, p = pentet, sept = septuplet, m = multiplet, br s = broad singlet, br d = broad doublet, app = apparent. Data for <sup>13</sup>C NMR are reported in terms of chemical shifts (δ ppm). IR spectra were obtained using Perkin Elmer Spectrum BXII spectrometer using thin films deposited on NaCl plates and reported in frequency of absorption (cm<sup>-1</sup>). Optical rotations were measured with a Jasco P-2000 polarimeter operating on the sodium D-line (589 nm), using a 100 mm path-length cell and are reported as: [α]<sub>D</sub><sup>T</sup> (concentration in 10 mg/1 mL, solvent). Analytical SFC was performed with a Mettler SFC supercritical CO<sub>2</sub> analytical chromatography system utilizing Chiralpak (AD-H, AS-H or IC) or Chiralcel (OD-H, OJ-H, or OB-H) columns (4.6 mm x 25 cm) obtained from Daicel Chemical Industries, Ltd. High resolution mass spectra (HRMS) were obtained from Agilent 6200 Series TOF with an Agilent G1978A Multimode source, or an Agilent 6230 TOF, in electrospray ionization (ESI+).

A crystal was mounted on a polyimide MiTeGen loop with STP Oil Treatment and placed under a nitrogen stream. Low temperature (100K) X-ray data ( $\phi$ - and  $\omega$ -scans) were collected with a Bruker AXS D8 VENTURE KAPPA diffractometer coupled to a PHOTON II CPAD detector with Cu  $K_{\alpha}$  radiation ( $\lambda = 1.54178 \text{ \AA}$ ) from an I $\mu$ S micro-source for the structure of compound V21097. The structure was solved by direct methods using SHELXS<sup>2</sup> and refined against  $F^2$  on all data by full-matrix least squares with SHELXL-2017<sup>3</sup> using established refinement techniques.<sup>4</sup> All non-hydrogen atoms were refined using anisotropic displacement parameters. Hydrogen atoms were placed in idealized positions and the coordinates refined (each of the two disordered pairs were constrained to the same position). The isotropic displacement parameters of all hydrogen atoms were fixed at 1.2 times (1.5 times for methyl groups and alcohol) the  $U_{eq}$  value of the bonded atom.

Reagents were purchased from Sigma-Aldrich, Acros Organics, Strem, or Alfa Aesar and used as received unless otherwise stated.

## List of Abbreviations:

ee – enantiomeric excess, SFC – supercritical fluid chromatography, TLC – thin-layer chromatography, IPA – isopropanol, LiHMDS – lithium bis(trimethylsilyl)amide, dba – dibenzylideneacetone, RBF – round-bottom flask, TFA – trifluoroacetic acid, TBAI – tetrabutylammonium iodide, TBABr – tetrabutylammonium bromide, TBACl – tetrabutylammonium chloride, Boc<sub>2</sub>O – di-*tert*-butyl dicarbonate, HPLC – high-performance liquid chromatography, DMAP – 4-dimethylaminopyridine, THF – tetrahydrofuran, BnBr – benzyl bromide, CDI – 1,1'-carbonyldiimidazole

## Syntheses of Hydroxymethyl 1,3-Disubstituted Isoquinolines

### General sequence:

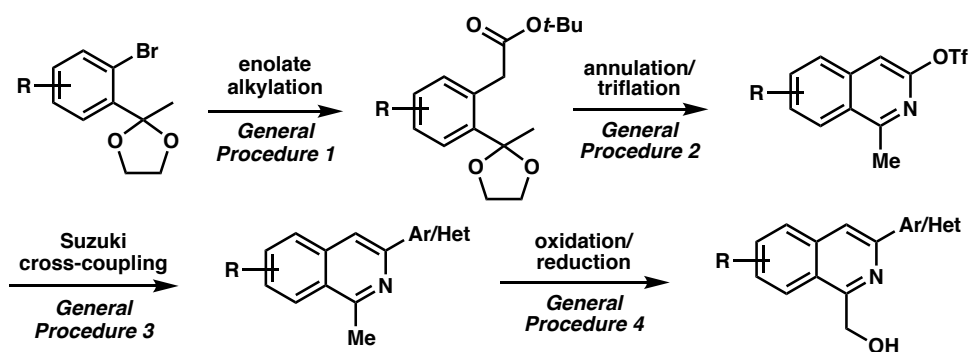

### General procedure 1: Enolate alkylation of aryl bromide

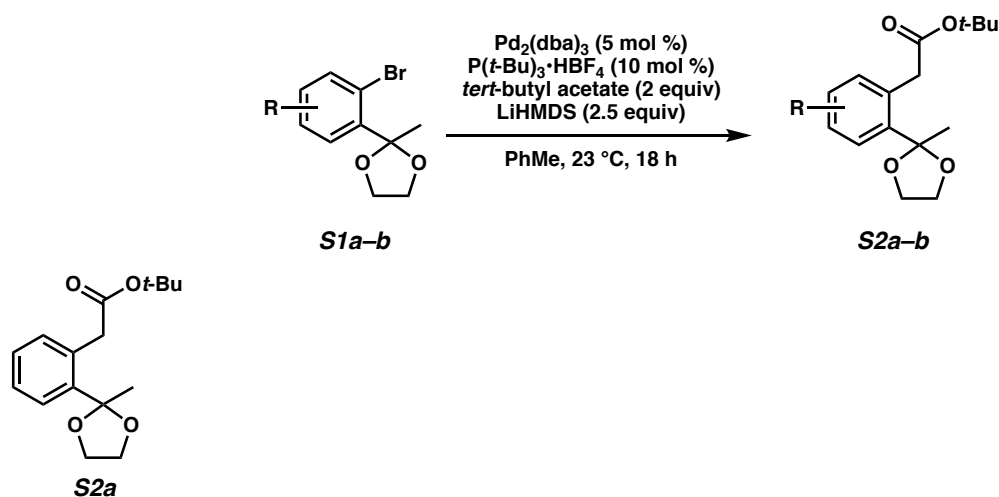

***tert*-butyl 2-(2-(2-methyl-1,3-dioxolan-2-yl)phenyl)acetate (S2a):** To a Schlenk flask were added  $\text{P}(t\text{-Bu})_3 \cdot \text{HBF}_4$  (1.4 g, 4.8 mmol, 0.1 equiv),  $\text{Pd}_2(\text{dba})_3$  (2.2 g, 2.4 mmol, 0.05 equiv), a solution of 2-(2-bromophenyl)-2-methyl-1,3-dioxolane (**S1a**) (12 g, 48 mmol, 0.42 M in toluene), and *tert*-butyl acetate (11 g, 97 mmol, 2 equiv), respectively. The reaction mixture was cooled to  $-78$  °C and sparged with  $\text{N}_2$  for 15 min. A degassed solution of LiHMDS (20 g, 121

mmol, 1 M in toluene) was then added via syringe. The reaction mixture was sparged with N<sub>2</sub> for an additional 15 minutes at -78 °C, and allowed to slowly warm to room temperature. The reaction mixture was stirred at 23 °C for 18 h, and then quenched with saturated aqueous NaHCO<sub>3</sub>. The aqueous layer was extracted with Et<sub>2</sub>O twice (2 x 100 mL). The combined organic phases were dried over MgSO<sub>4</sub>, filtered, and the solvent was removed in vacuo. The crude product was purified by silica gel flash chromatography (5% EtOAc in hexanes) to afford **S2a** as a yellow oil (12.4 g, 44.5 mmol, 92% yield); <sup>1</sup>H NMR (400 MHz, CDCl<sub>3</sub>) δ 7.53 – 7.45 (m, 1H), 7.20 – 7.06 (m, 3H), 3.96 – 3.83 (m, 2H), 3.71 (s, 2H), 3.68 – 3.55 (m, 2H), 1.60 (s, 3H), 1.39 (s, 9H); All characterization data match those reported in the literature.<sup>5</sup>

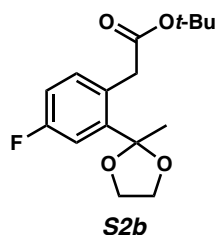

**tert-butyl 2-(4-fluoro-2-(2-methyl-1,3-dioxolan-2-yl)phenyl)acetate (S2b):** Compound **S2b** was prepared using general procedure 1 and purified by column chromatography (10% EtOAc in hexanes) to provide a colorless solid (1.9 g, 60% yield); <sup>1</sup>H NMR (400 MHz, CDCl<sub>3</sub>) δ 7.28 (dd, *J* = 10.3, 2.8 Hz, 1H), 7.15 (dd, *J* = 8.4, 5.7 Hz, 1H), 6.94 (td, *J* = 8.2, 2.9 Hz, 1H), 4.06 – 3.90 (m, 2H), 3.74 (s, 2H), 3.72 – 3.69 (m, 2H), 1.65 (s, 3H), 1.45 (s, 9H); All characterization data match those reported in the literature.<sup>5</sup>

### General procedure 2: Isoquinoline annulation and triflation

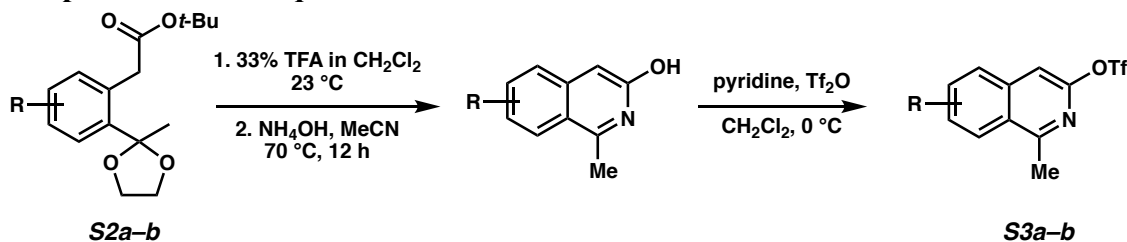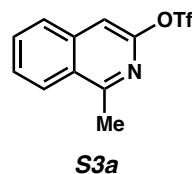

**1-methylisoquinolin-3-yl trifluoromethanesulfonate (S3a):** To a RBF was added ester **S2a** (12.4 g, 48 mmol), anhydrous CH<sub>2</sub>Cl<sub>2</sub> (480 mL, 0.1 M), and TFA (160 mL, 33% volume of CH<sub>2</sub>Cl<sub>2</sub>), respectively. The reaction mixture was stirred at 23 °C for 2 h, and then concentrated in vacuo. The crude mixture was transferred to a Schlenk tube, and dissolved in MeCN (48 mL, 1 M) and aqueous NH<sub>4</sub>OH (28–30%, 96 mL, 200% volume of MeCN). The tube was sealed with a Kontes valve to prevent loss of gaseous ammonia and stirred at 70 °C. Within 1 h, the yellow



solid of the 3-hydroxyisoquinoline began to precipitate from the solution. After stirring for 18 hours at 70 °C, the reaction mixture was cooled to room temperature and placed in a -20 °C freezer overnight, and the yellow solid was collected via vacuum filtration. This yellow powder was then washed with cold MeCN and dried under high vacuum to provide a 3-hydroxyisoquinoline intermediate (3.9 g, 24 mmol). If any starting material remains, the filtrate could be transferred to a flask and concentrated in vacuo to undergo a second condensation reaction.

To a separate flame-dried RBF containing CH<sub>2</sub>Cl<sub>2</sub> (120 mL, 0.2 M) and freshly distilled pyridine (19.6 mL, 242 mmol, 10 equiv), the collected intermediate (3.9 g, 24 mmol) was added, and the flask was cooled to 0 °C. Trifluoromethanesulfonic anhydride (8.2 mL, 48 mmol, 2 equiv) was then added dropwise at 0 °C, and the reaction mixture was stirred at 0 °C for 1 h. The reaction was then quenched with saturated aqueous NaHCO<sub>3</sub> at 0 °C, and then slowly warmed to room temperature. The reaction mixture was extracted with CH<sub>2</sub>Cl<sub>2</sub> (2 x 100 mL), dried over Na<sub>2</sub>SO<sub>4</sub>, and concentrated in vacuo. The crude product was purified by column chromatography (10% EtOAc in hexanes) to afford **S3a** as a pale yellow oil (5.0 g, 17 mmol, 36% yield over 3 steps): <sup>1</sup>H NMR (400 MHz, CDCl<sub>3</sub>) δ 8.17 (dd, *J* = 8.5, 1.0 Hz, 1H), 7.88 (dt, *J* = 8.3, 1.0 Hz, 1H), 7.76 (ddd, *J* = 8.2, 6.9, 1.2 Hz, 1H), 7.67 (ddd, *J* = 8.3, 6.9, 1.3 Hz, 1H), 7.42 (s, 1H), 2.97 (s, 3H); All characterization data match those reported in the literature.<sup>5</sup>

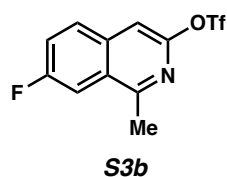

**7-fluoro-1-methylisoquinolin-3-yl trifluoromethanesulfonate (S3b):** Compound **S3b** was prepared using general procedure 2 and purified by column chromatography (10% EtOAc in hexanes) to provide a pale brown oil (1.3 g, 39% yield over 3 steps); <sup>1</sup>H NMR (400 MHz, CDCl<sub>3</sub>) δ 7.90 (dd, *J* = 9.0, 5.3 Hz, 1H), 7.76 (dd, *J* = 9.6, 2.5 Hz, 1H), 7.56 (ddd, *J* = 8.9, 8.0, 2.5 Hz, 1H), 7.43 (s, 1H), 2.92 (s, 3H); All characterization data match those reported in the literature.<sup>5</sup>

### General procedure 3: Suzuki cross-coupling

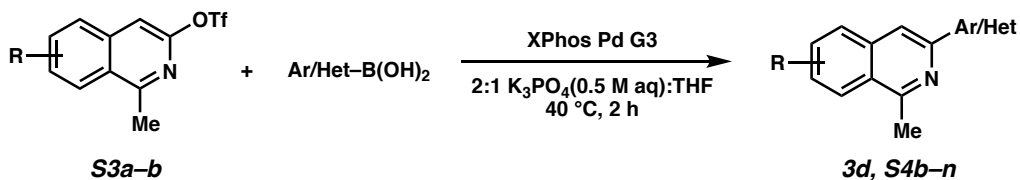

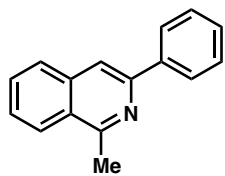

**3d**

**1-methyl-3-phenylisoquinoline (3d):** To a flame-dried 20-mL scintillation vial capped with a PTFE-lined silicone septum was added XPhos Pd G3 (50 mg, 0.05 mmol, 0.02 equiv) and phenyl boronic acid (548 mg, 3.8 mmol, 1.5 equiv). The reaction vial was then evacuated and backfilled with N<sub>2</sub> three times. The isoquinoline triflate **S3a** (720 mg, 2.5 mmol) in degassed THF (7 mL, 0.3 M) was then added to the vial, followed by degassed 0.5 M K<sub>3</sub>PO<sub>4</sub> solution (13 mL, 0.2 M). The reaction was then stirred at 40 °C for 2 hours. Afterwards, the reaction was diluted with water and the aqueous layer was extracted with Et<sub>2</sub>O. The combined organic phases were dried over Na<sub>2</sub>SO<sub>4</sub>, concentrated in vacuo, and purified by column chromatography (5% EtOAc in hexanes) to afford **3d** as a white solid (495 mg, 2.3 mmol, 91% yield); <sup>1</sup>H NMR (400 MHz, CDCl<sub>3</sub>) δ 8.15 – 8.13 (m, 3H), 7.93 (s, 1H), 7.86 (dt, *J* = 8.3, 1.0 Hz, 1H), 7.67 (ddd, *J* = 8.2, 6.9, 1.2 Hz, 1H), 7.57 (ddd, *J* = 8.2, 6.8, 1.3 Hz, 1H), 7.52 – 7.48 (m, 2H), 7.42 – 7.38 (m, 1H), 3.05 (s, 3H); All characterization data match those reported in the literature.<sup>5</sup>

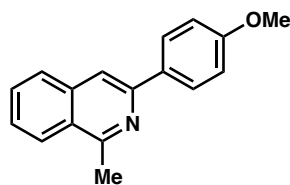

**S4b**

**3-(4-methoxyphenyl)-1-methylisoquinoline (S4b):** Compound **S4b** was prepared using general procedure 3 and purified by column chromatography (5% EtOAc in hexanes) to provide a white solid (101 mg, 99% yield); <sup>1</sup>H NMR (400 MHz, CDCl<sub>3</sub>) δ 8.17 – 8.07 (m, 3H), 7.89 – 7.81 (m, 2H), 7.68 (ddd, *J* = 8.2, 6.9, 1.2 Hz, 1H), 7.58 (ddd, *J* = 8.2, 6.8, 1.3 Hz, 1H), 7.20 – 7.16 (m, 2H), 3.04 (s, 3H); All characterization data match those reported in the literature.<sup>5</sup>

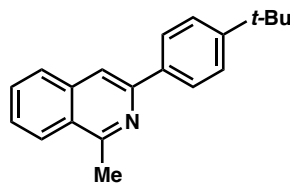

**S4c**

**3-(4-tert-butylphenyl)-1-methylisoquinoline (S4c):** Compound **S4c** was prepared using general procedure 3 and purified by column chromatography (5% EtOAc in hexanes) to provide a pale yellow oil (164 mg, 86% yield); <sup>1</sup>H NMR (400 MHz, CDCl<sub>3</sub>) δ 8.14 – 8.07 (m, 3H), 7.84 (s, 1H), 7.81 (d, *J* = 8.5, 1H), 7.64 (ddd, *J* = 8.2, 6.8, 1.2 Hz, 1H), 7.53 (ddd, *J* = 8.2, 6.8, 1.3 Hz,

1H), 7.06 – 7.01 (m, 2H), 3.88 (s, 3H), 3.03 (s, 3H); All characterization data match those reported in the literature.<sup>5</sup>

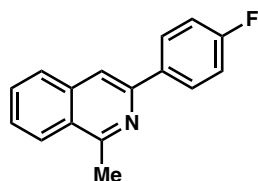

**S4d**

**3-(4-fluorophenyl)-1-methylisoquinoline (S4d):** Compound **S4d** was prepared using general procedure 3 and purified by column chromatography (10% EtOAc in hexanes) to provide a white solid (158 mg, 96% yield); <sup>1</sup>H NMR (400 MHz, CDCl<sub>3</sub>) δ 8.12 (d, *J* = 8.4 Hz, 1H) 8.06 (d, *J* = 8.5 Hz, 2H), 7.90 (s, 1H), 7.85 (d, *J* = 8.2 Hz, 1H), 7.66 (ddd, *J* = 8.1, 6.8, 1.2 Hz, 1H), 7.57 – 7.52 (m, 3H), 3.04 (s, 3H), 1.38 (s, 9H); All characterization data match those reported in the literature.<sup>5</sup>

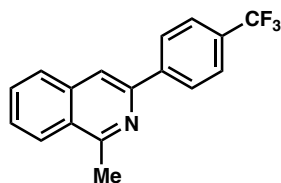

**S4e**

**1-methyl-3-(4-(trifluoromethyl)phenyl)isoquinoline (S4e):** Compound **S4e** was prepared using general procedure 3 and purified by column chromatography (2% to 3% EtOAc in hexanes) to provide a white solid (449 mg, 91% yield); <sup>1</sup>H NMR (400 MHz, CDCl<sub>3</sub>) δ 8.26 (d, *J* = 8.1 Hz, 2H), 8.15 (d, *J* = 8.4, 1H), 7.96 (s, 1H), 7.88 (d, *J* = 8.2 Hz, 1H), 7.78 – 7.73 (m, 2H), 7.73 – 7.67 (m, 1H), 7.63 – 7.59 (m, 1H), 3.05 (s, 3H); All characterization data match those reported in the literature.<sup>5</sup>

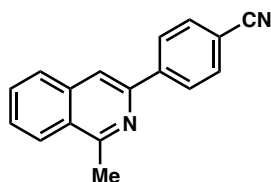

**S4f**

**4-(1-methylisoquinolin-3-yl)benzotrile (S4f):** Compound **S4f** was prepared using general procedure 3 and purified by column chromatography (10% to 20% EtOAc in hexanes) to provide a white solid (122 mg, 72% yield); <sup>1</sup>H NMR (400 MHz, CDCl<sub>3</sub>) δ 8.38 – 8.22 (m, 2H), 8.16 (d, *J* = 8.3 Hz, 1H), 7.99 (s, 1H), 7.89 (d, *J* = 8.3, 1H), 7.82 – 7.75 (m, 2H), 7.73 (ddd, *J* = 8.1, 6.9, 1.2 Hz, 1H), 7.64 (ddd, *J* = 8.2, 6.9, 1.3 Hz, 1H), 3.05 (s, 3H); All characterization data match those reported in the literature.<sup>5</sup>

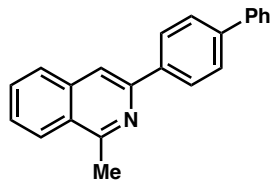

**S4g**

**3-([1,1'-biphenyl]-4-yl)-1-methylisoquinoline (S4g):** Compound **S4g** was prepared using general procedure 3 and purified by column chromatography (5% EtOAc in hexanes) to provide a colorless solid (191 mg, 94% yield);  $^1\text{H NMR}$  (400 MHz,  $\text{CDCl}_3$ )  $\delta$  8.24 – 8.22 (m, 2H), 8.14 (d,  $J = 8.4$  Hz, 1H), 7.98 (s, 1H), 7.88 (d,  $J = 8.1$  Hz, 1H), 7.75 – 7.73 (m, 2H), 7.70 – 7.67 (m, 3H), 7.58 (ddd,  $J = 8.3, 6.9, 1.3$  Hz, 1H), 7.50 – 7.46 (m, 2H), 7.39 – 7.37 (m, 1H), 3.06 (s, 3H); All characterization data match those reported in the literature.<sup>5</sup>

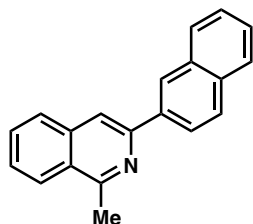

**S4h**

**1-methyl-3-(naphthalen-2-yl)isoquinoline (S4h):** Compound **S4h** was prepared using general procedure 3 and purified by column chromatography (5% EtOAc in hexanes) to provide a white solid (142 mg, 77% yield);  $^1\text{H NMR}$  (400 MHz,  $\text{CDCl}_3$ )  $\delta$  8.68 (s, 1H), 8.27 (dd,  $J = 8.6, 1.8$  Hz, 1H), 8.16 (dq,  $J = 8.3, 1.0$  Hz, 1H), 8.07 (s, 1H), 8.00 – 7.96 (m, 2H), 7.91 – 7.86 (m, 2H), 7.70 (ddd,  $J = 8.2, 6.8, 1.2$  Hz, 1H), 7.59 (ddd,  $J = 8.2, 6.8, 1.3$  Hz, 1H), 7.56 – 7.46 (m, 2H), 3.09 (s, 3H); All characterization data match those reported in the literature.<sup>5</sup>

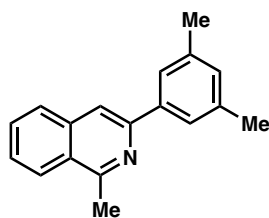

**S4i**

**3-(3,5-dimethylphenyl)-1-methylisoquinoline (S4i):** Compound **S4i** was prepared using general procedure 3 and purified by column chromatography (5% EtOAc in hexanes) to provide a white solid (156 mg, 92% yield);  $^1\text{H NMR}$  (400 MHz,  $\text{CDCl}_3$ )  $\delta$  8.13 (dd,  $J = 8.4, 1.1$  Hz, 1H), 7.90 (s, 1H), 7.85 (dd,  $J = 8.2, 0.7$  Hz, 1H), 7.75 (s, 2H), 7.66 (ddd,  $J = 8.2, 6.8, 1.2$  Hz, 1H), 7.56 (ddd,  $J = 8.2, 6.9, 1.3$  Hz, 1H), 7.05 (s, 1H), 3.05 (s, 3H), 2.43 (s, 6H); All characterization data match those reported in the literature.<sup>5</sup>

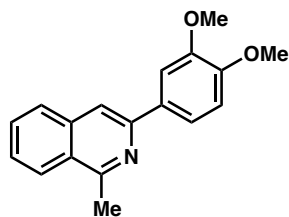

**S4j**

**3-(3,4-dimethoxyphenyl)-1-methylisoquinoline (S4j):** Compound **S4j** was prepared using general procedure 3 and purified by column chromatography (20% EtOAc in hexanes) to provide a white solid (248 mg, 86% yield);  $^1\text{H}$  NMR (400 MHz,  $\text{CDCl}_3$ )  $\delta$  8.11 (d,  $J = 8.4$ , 1H), 7.89 – 7.81 (m, 2H), 7.77 (d,  $J = 2.1$  Hz, 1H), 7.71 – 7.61 (m, 2H), 7.55 (ddd,  $J = 8.3$ , 6.9, 1.3 Hz, 1H), 6.99 (d,  $J = 8.4$  Hz, 1H), 4.04 (s, 3H), 3.95 (s, 3H), 3.04 (s, 3H); All characterization data match those reported in the literature.<sup>5</sup>

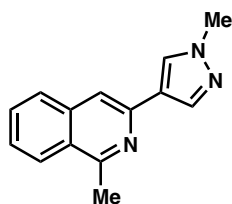

**S4k**

**1-methyl-3-(1-methyl-1H-pyrazol-4-yl)isoquinoline (S4k):** Compound **S4k** was prepared using general procedure 3 and purified by column chromatography (50% to 60% EtOAc in hexanes) to provide a white solid (124 mg, 64% yield);  $^1\text{H}$  NMR (400 MHz,  $\text{CDCl}_3$ )  $\delta$  8.07 (d,  $J = 8.4$  Hz, 1H), 8.04 – 8.00 (m, 2H), 7.77 (dd,  $J = 8.2$ , 1.1 Hz, 1H), 7.67 – 7.60 (m, 2H), 7.54 – 7.47 (m, 1H), 3.98 (s, 3H), 2.97 (s, 3H); All characterization data match those reported in the literature.<sup>5</sup>

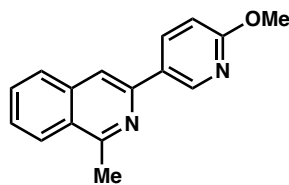

**S4l**

**3-(6-methoxypyridin-3-yl)-1-methylisoquinoline (S4l):** Compound **S4l** was prepared from triflate **S3a** using general procedure 3 and purified by column chromatography (15% EtOAc in hexanes) to afford a white solid (232 mg, 90% yield):  $^1\text{H}$  NMR (400 MHz,  $\text{CDCl}_3$ )  $\delta$  8.89 (dd,  $J = 2.5$ , 0.8 Hz, 1H), 8.36 (dd,  $J = 8.6$ , 2.5 Hz, 1H), 8.11 (dd,  $J = 8.4$ , 1.0 Hz, 1H), 7.85 – 7.83 (m, 2H), 7.67 (ddd,  $J = 8.2$ , 6.9, 1.2 Hz, 1H), 7.56 (ddd,  $J = 8.1$ , 6.9, 1.3 Hz, 1H), 6.87 (dd,  $J = 8.6$ , 0.8 Hz, 1H), 4.01 (s, 3H), 3.02 (s, 3H);  $^{13}\text{C}$  NMR (100 MHz,  $\text{CDCl}_3$ )  $\delta$  164.4, 159.0, 147.7, 145.7, 137.6, 136.8, 130.3, 129.2, 127.6, 126.9, 126.6, 125.8, 114.5, 110.8, 53.8, 22.8; IR (Neat Film, NaCl) 2937, 2363, 1604, 1568, 1498, 1443, 1326, 1278, 1254, 1119, 1021, 831, 745; HRMS (MM:ESI-APCI+)  $m/z$  calc'd for  $\text{C}_{16}\text{H}_{15}\text{N}_2\text{O}$   $[\text{M}+\text{H}]^+$ : 251.1184, found 251.1185.

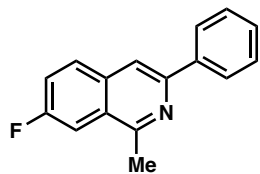

**S4m**

**7-fluoro-1-methyl-3-phenylisoquinoline (S4m):** Compound **S4m** was prepared using general procedure 3 and purified by column chromatography (5% EtOAc in hexanes) to provide a white solid (254 mg, 83% yield);  $^1\text{H NMR}$  (400 MHz,  $\text{CDCl}_3$ )  $\delta$  8.14 – 8.11 (m, 2H), 7.90 (s, 1H), 7.85 (dd,  $J = 9.2, 5.7$  Hz, 1H), 7.73 – 7.68 (m, 1H), 7.54 – 7.48 (m, 2H), 7.48 – 7.38 (m, 2H), 2.99 (s, 3H); All characterization data match those reported in the literature.<sup>5</sup>

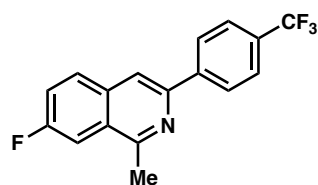

**S4n**

**7-fluoro-1-methyl-3-(4-(trifluoromethyl)phenyl)isoquinoline (S4n):** Compound **S4n** was prepared using general procedure 3 and purified by column chromatography (5% EtOAc in hexanes) to provide a white solid (349 mg, 89% yield);  $^1\text{H NMR}$  (400 MHz,  $\text{CDCl}_3$ )  $\delta$  8.22 (d,  $J = 8.0$  Hz, 2H), 7.94 (s, 1H), 7.90 – 7.85 (m, 1H), 7.74 (d,  $J = 8.0$  Hz, 2H), 7.71 – 7.69 (m, 1H), 7.53 – 7.43 (m, 1H), 2.99 (s, 3H); All characterization data match those reported in the literature.<sup>5</sup>

#### General procedure 4: Oxidation and reduction to hydroxymethyl isoquinoline

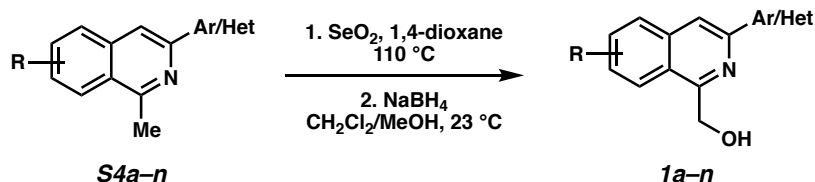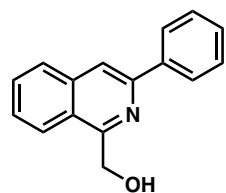

**1a**

**(3-phenylisoquinolin-1-yl)methanol (1a):** To a 20-mL microwave vial under  $\text{N}_2$  containing a magnetic stir bar was added  $\text{SeO}_2$  (375 mg, 3.4 mmol, 2 equiv), isoquinoline **S4a** (370 mg, 1.7 mmol), and 1,4-dioxane (17 mL, 0.1 M). The reaction vial was then sealed and heated to 110 °C while stirring for 2 hours. The reaction mixture was then cooled to 23 °C, filtered through celite,

and rinsed with EtOAc. The filtrate was then concentrated in vacuo to afford the crude aldehyde intermediate that was used in the next step without further purification.

To a scintillation vial containing the crude aldehyde in 4:1 CH<sub>2</sub>Cl<sub>2</sub>:MeOH (0.1 M) was added sodium borohydride (96 mg, 2.5 mmol, 1.5 equiv) at 23 °C. The reaction mixture was stirred until no starting material remained by TLC, and then quenched by the addition of citric acid monohydrate (355 mg, 1.7 mmol, 1 equiv). The reaction mixture was stirred for an additional 10 minutes at 23 °C, then basified by the addition of saturated aqueous NaHCO<sub>3</sub>. The layers were separated and the aqueous phase was extracted with CH<sub>2</sub>Cl<sub>2</sub> (2 x 20 mL). The combined organic phases were dried over Na<sub>2</sub>SO<sub>4</sub> and concentrated in vacuo. The crude product was purified by column chromatography (10% acetone in hexanes) to afford **1a** as a white solid (337 mg, 1.43 mmol, 85% yield over 2 steps): <sup>1</sup>H NMR (400 MHz, CDCl<sub>3</sub>) δ 8.18 – 8.15 (d, *J* = 7.0 Hz, 2H), 8.03 (s, 1H), 7.94 – 7.92 (m, 2H), 7.73 (ddd, *J* = 8.3, 6.9, 1.1 Hz, 1H), 7.61 (ddd, *J* = 8.1, 6.9, 1.2 Hz, 1H), 7.53 (t, *J* = 7.6 Hz, 2H), 7.46 – 7.42 (m, 1H), 5.31 (s, 2H), 5.26 (br s, 1H, OH); All characterization data match those reported in the literature.<sup>5</sup>

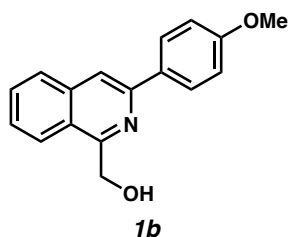

**(3-(4-methoxyphenyl)isoquinolin-1-yl)methanol (1b):** Compound **1b** was prepared using general procedure 4 and purified by column chromatography (20% EtOAc in hexanes) to provide a white solid (148 mg, 81% yield); <sup>1</sup>H NMR (400 MHz, CDCl<sub>3</sub>) δ 8.14 – 8.07 (m, 2H), 7.93 (s, 1H), 7.91 – 7.85 (m, 2H), 7.69 (ddd, *J* = 8.2, 6.9, 1.1 Hz, 1H), 7.56 (ddd, *J* = 8.2, 6.9, 1.2 Hz, 1H), 7.06 – 7.03 (m, 2H), 5.28 (s, 3H), 3.89 (s, 3H); All characterization data match those reported in the literature.<sup>5</sup>

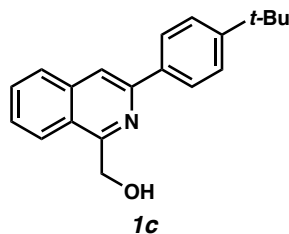

**((3-(4-tert-butyl)phenyl)isoquinolin-1-yl)methanol (1c):** Compound **1c** was prepared using general procedure 4 and purified by column chromatography (20% EtOAc in hexanes) to provide a white solid (135 mg, 78% yield); <sup>1</sup>H NMR (400 MHz, CDCl<sub>3</sub>) δ 8.20 – 8.06 (m, 2H), 8.00 (s, 1H), 7.97 – 7.85 (m, 2H), 7.72 (ddd, *J* = 8.4, 6.9, 1.2 Hz, 1H), 7.62 – 7.58 (m, 1H), 7.58 – 7.52 (m, 2H), 5.30 (s, 3H), 1.40 (s, 9H); All characterization data match those reported in the literature.<sup>5</sup>

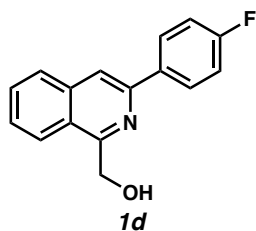

**(3-(4-fluorophenyl)isoquinolin-1-yl)methanol (1d):** Compound **1d** was prepared using general procedure 4 and purified by column chromatography (20% EtOAc in hexanes) to provide a colorless solid (134 mg, 80% yield);  $^1\text{H}$  NMR (400 MHz,  $\text{CDCl}_3$ )  $\delta$  8.13 (dd,  $J = 8.9, 5.4$  Hz, 2H), 7.96 (s, 1H), 7.95 – 7.89 (m, 2H), 7.73 (ddd,  $J = 8.3, 6.9, 1.1$  Hz, 1H), 7.61 (ddd,  $J = 8.1, 6.9, 1.2$  Hz, 1H), 7.21 (dd,  $J = 8.9, 8.5$  Hz, 2H), 5.30 (s, 2H), 5.17 (br s, 1H, OH); All characterization data match those reported in the literature.<sup>5</sup>

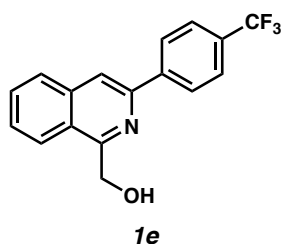

**(3-(4-(trifluoromethyl)phenyl)isoquinolin-1-yl)methanol (1e):** Compound **1e** was prepared using general procedure 4 and purified by column chromatography (10% to 20% EtOAc in hexanes) to provide a white solid (302 mg, 58% yield);  $^1\text{H}$  NMR (400 MHz,  $\text{CDCl}_3$ )  $\delta$  8.26 (d,  $J = 7.8$  Hz, 2H), 8.07 (s, 1H), 8.00 – 7.92 (m, 2H), 7.82 – 7.73 (m, 3H), 7.70 – 7.61 (m, 1H), 5.32 (s, 2H), 5.10 (br s, 1H, OH); All characterization data match those reported in the literature.<sup>5</sup>

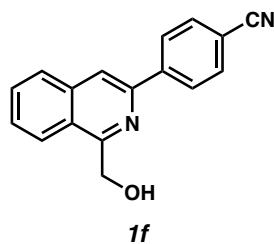

**4-(1-(hydroxymethyl)isoquinolin-3-yl)benzonitrile (1f):** Compound **1f** was prepared using general procedure 4 and purified by column chromatography (30% EtOAc in hexanes) to provide a white solid (112 mg, 86% yield);  $^1\text{H}$  NMR (400 MHz,  $\text{CDCl}_3$ )  $\delta$  8.31 – 8.18 (m, 2H), 8.09 (s, 1H), 7.97 (m, 2H), 7.86 – 7.74 (m, 3H), 7.68 (ddd,  $J = 8.2, 6.9, 1.2$  Hz, 1H), 5.32 (s, 2H), 4.99 (s, 1H); All characterization data match those reported in the literature.<sup>5</sup>



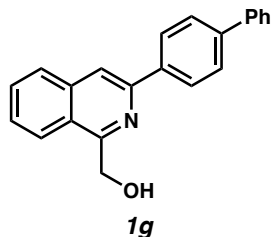

**(3-([1,1'-biphenyl]-4-yl)isoquinolin-1-yl)methanol (1g):** Compound **1g** was prepared using general procedure 4 and purified by column chromatography (20% EtOAc in hexanes) to provide a colorless solid (79 mg, 83% yield);  $^1\text{H}$  NMR (400 MHz,  $\text{CDCl}_3$ )  $\delta$  8.30 – 8.20 (m, 2H), 8.07 (s, 1H), 7.98 – 7.88 (m, 2H), 7.81 – 7.66 (m, 5H), 7.62 (ddd,  $J = 8.4, 6.9, 1.2$  Hz, 1H), 7.49 (dd,  $J = 8.2, 6.8$  Hz, 2H), 7.43 – 7.34 (m, 1H), 5.32 (s, 3H); All characterization data match those reported in the literature.<sup>5</sup>

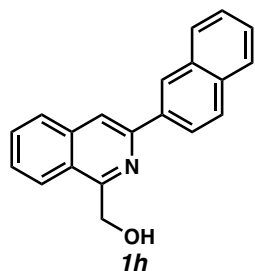

**(3-(naphthalen-2-yl)isoquinolin-1-yl)methanol (1h):** Compound **1h** was prepared using general procedure 4 and purified by column chromatography (20% EtOAc in hexanes) to provide a white solid (124 mg, 82% yield);  $^1\text{H}$  NMR (400 MHz,  $\text{CDCl}_3$ )  $\delta$  8.67 (s, 1H), 8.27 (dd,  $J = 8.6, 1.8$  Hz, 1H), 8.16 (s, 1H), 8.05 – 7.93 (m, 4H), 7.91 – 7.89 (m, 1H), 7.75 (ddd,  $J = 8.2, 6.9, 1.1$  Hz, 1H), 7.62 (ddd,  $J = 8.2, 6.9, 1.2$  Hz, 1H), 7.58 – 7.47 (m, 2H), 5.34 (s, 3H); All characterization data match those reported in the literature.<sup>5</sup>

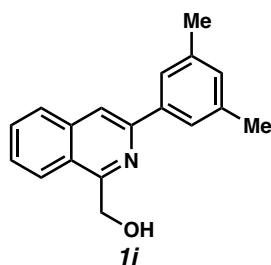

**(3-(3,5-dimethylphenyl)isoquinolin-1-yl)methanol (1i):** Compound **1i** was prepared using general procedure 4 and purified by column chromatography (20% EtOAc in hexanes) to provide a white solid (155 mg, 95% yield);  $^1\text{H}$  NMR (400 MHz,  $\text{CDCl}_3$ )  $\delta$  8.00 (s, 1H), 7.94 – 7.91 (m, 2H), 7.78 – 7.76 (m, 2H), 7.72 (ddd,  $J = 8.3, 6.9, 1.2$  Hz, 1H), 7.60 (ddd,  $J = 8.2, 6.9, 1.2$  Hz, 1H), 7.09 (s, 1H), 5.30 (s, 3H), 2.44 (s, 6H); All characterization data match those reported in the literature.<sup>5</sup>

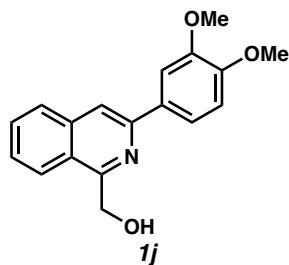

**(3-(3,4-dimethoxyphenyl)isoquinolin-1-yl)methanol (1j):** Compound **1j** was prepared using general procedure 4 and purified by column chromatography (40% EtOAc in hexanes) to provide a white solid (168 mg, 64% yield);  $^1\text{H NMR}$  (400 MHz,  $\text{CDCl}_3$ )  $\delta$  7.95 (s, 1H), 7.93 – 7.90 (m, 2H), 7.77 – 7.67 (m, 3H), 7.58 (ddd,  $J = 8.2, 6.9, 1.2$  Hz, 1H), 7.03 – 7.01 (m, 1H), 5.30 (s, 2H), 5.26 (br s, 1H, OH), 4.03 (s, 3H), 3.97 (s, 3H); All characterization data match those reported in the literature.<sup>5</sup>

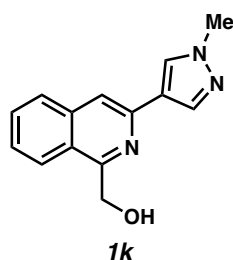

**(3-(1-methyl-1H-pyrazol-4-yl)isoquinolin-1-yl)methanol (1k):** Compound **1k** was prepared using general procedure 4 and purified by column chromatography (70% to 80% EtOAc in hexanes + 1%  $\text{NEt}_3$ ) to provide a pale beige solid (93 mg, 71% yield);  $^1\text{H NMR}$  (400 MHz,  $\text{CDCl}_3$ )  $\delta$  8.08 – 7.95 (m, 2H), 7.85 – 7.79 (m, 2H), 7.71 – 7.59 (m, 2H), 7.53 – 7.49 (m, 1H), 5.21 (s, 2H), 3.98 (s, 3H); All characterization data match those reported in the literature.<sup>5</sup>

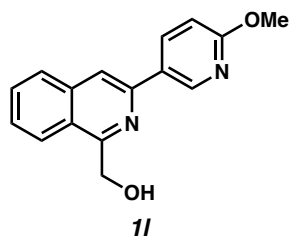

**(3-(6-methoxypyridin-3-yl)isoquinolin-1-yl)methanol (1l):** Compound **1l** was prepared from isoquinoline **S4l** using general procedure 4 and purified by column chromatography (20% to 30% EtOAc in hexanes) to provide a white solid (177 mg, 72% yield);  $^1\text{H NMR}$  (400 MHz,  $\text{CDCl}_3$ )  $\delta$  8.94 (dd,  $J = 2.6, 0.7$  Hz, 1H), 8.34 (dd,  $J = 8.7, 2.5$  Hz, 1H), 7.94 – 7.91 (m, 3H), 7.73 (ddd,  $J = 8.2, 6.9, 1.1$  Hz, 1H), 7.61 (ddd,  $J = 8.2, 6.9, 1.2$  Hz, 1H), 6.89 (dd,  $J = 8.7, 0.7$  Hz, 1H), 5.30 (s, 2H), 5.10 (br s, 1H, OH), 4.03 (s, 3H);  $^{13}\text{C NMR}$  (100 MHz,  $\text{CDCl}_3$ )  $\delta$  164.6, 157.7, 146.4, 145.7, 137.2, 137.0, 131.1, 128.2, 127.8, 127.6, 124.1, 123.3, 115.4, 111.1, 61.6, 53.9; IR (Neat Film, NaCl) 3380, 3058, 2948, 2363, 1624, 1606, 1573, 1504, 1447, 1380, 1326, 1286,

1088, 1024, 832, 747  $\text{cm}^{-1}$ ; HRMS (MM:ESI-APCI+)  $m/z$  calc'd for  $\text{C}_{16}\text{H}_{15}\text{N}_2\text{O}_2$   $[\text{M}+\text{H}]^+$ : 267.1128, found 267.1131.

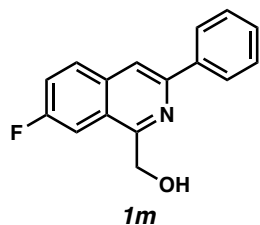

**(7-fluoro-3-phenylisoquinolin-1-yl)methanol (1m):** Compound **1m** was prepared using general procedure 4 and purified by column chromatography (10% EtOAc in hexanes) to provide a white solid (94 mg, 81% yield);  $^1\text{H}$  NMR (400 MHz,  $\text{CDCl}_3$ )  $\delta$  8.13 (d,  $J = 8.0$  Hz, 2H), 8.00 (s, 1H), 7.96 – 7.87 (m, 1H), 7.57 – 7.47 (m, 4H), 7.44 (td,  $J = 6.9, 6.4, 1.4$  Hz, 1H), 5.21 (s, 2H), 5.11 (br s, 1H, OH); All characterization data match those reported in the literature.<sup>5</sup>

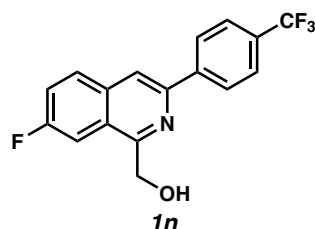

**(7-fluoro-3-(4-(trifluoromethyl)phenyl)isoquinolin-1-yl)methanol (1n):** Compound **1n** was prepared using general procedure 4 and purified by column chromatography (10% EtOAc in hexanes) to provide a white solid (80 mg, 60% yield);  $^1\text{H}$  NMR (400 MHz,  $\text{CDCl}_3$ )  $\delta$  8.20 (d,  $J = 8.1$  Hz, 2H), 8.02 (s, 1H), 7.95 (dd,  $J = 9.8, 5.4$  Hz, 1H), 7.74 (d,  $J = 8.3$  Hz, 2H), 7.58 – 7.47 (m, 2H), 5.21 (s, 2H), 4.94 (br s, 1H, OH); All characterization data match those reported in the literature.<sup>5</sup>

### Syntheses of 1,3-Disubstituted Isoquinolines with Different Directing Groups

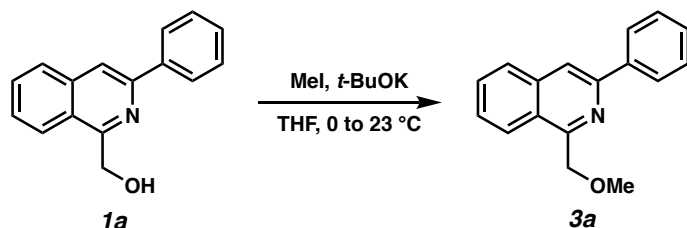

**1-(methoxymethyl)-3-phenylisoquinoline (3a):** To a scintillation vial containing a magnetic stir bar and isoquinoline **1a** (165 mg, 0.70 mmol) in THF (7 mL, 0.1 M) was added  $\text{KO}t\text{-Bu}$  (86 mg, 0.77 mmol, 1.1 equiv) at 23  $^\circ\text{C}$ . The resulting mixture was stirred for 5 minutes, then cooled to 0  $^\circ\text{C}$ , followed by the addition of MeI (0.05 mL, 0.77 mmol, 1.1 equiv). The reaction was allowed to slowly warm to 23  $^\circ\text{C}$  overnight and then was quenched with saturated aqueous  $\text{NH}_4\text{Cl}$ . The organic phase was collected and the aqueous phase was extracted with EtOAc (2 x 20 mL). The

organic phases were combined, dried over  $\text{MgSO}_4$ , and concentrated in vacuo. The crude product was purified by column chromatography (5% EtOAc in hexanes) to afford **3a** as a white solid (79 mg, 45% yield):  $^1\text{H NMR}$  (400 MHz,  $\text{CDCl}_3$ )  $\delta$  8.36 (dd,  $J = 8.4, 1.1$  Hz, 1H), 8.20 – 8.13 (m, 2H), 8.04 (s, 1H), 7.89 (d,  $J = 8.3$  Hz, 1H), 7.69 (ddd,  $J = 8.2, 6.8, 1.2$  Hz, 1H), 7.60 (ddd,  $J = 8.2, 6.8, 1.3$  Hz, 1H), 7.51 (td,  $J = 7.3, 6.5, 1.2$  Hz, 2H), 7.45 – 7.37 (m, 1H), 5.14 (s, 2H), 3.51 (s, 3H); All characterization data match those reported in the literature.<sup>5</sup>

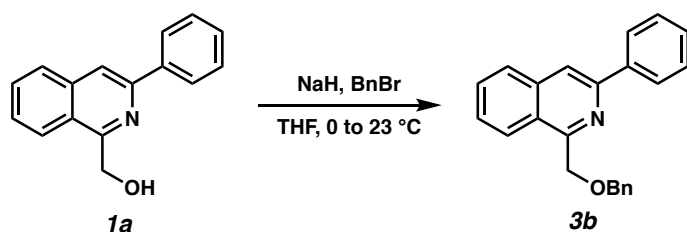

**1-((benzyloxy)methyl)-3-phenylisoquinoline (3b):** This procedure has been adapted from a previous report.<sup>6</sup> To a flame-dried RBF equipped with a magnetic stir bar was added NaH (36.4 mg, 60% w/w in mineral oil, 0.91 mmol, 1.3 equiv) and THF (7 mL, 0.1 M). To this suspension, isoquinoline **1a** (165 mg, 0.70 mmol) was added. After 5 minutes of stirring at room temperature, the reaction mixture was cooled to 0 °C and BnBr (0.91 mL, 0.91 mmol, 1.3 equiv) was added. The reaction was allowed to slowly warm to room temperature overnight. Silica (1 g) was then added and the solvent was evaporated under vacuum. The crude product was purified by column chromatography (5% EtOAc in hexanes) to afford **3b** as a colorless viscous oil (153 mg, 67% yield):  $^1\text{H NMR}$  (400 MHz,  $\text{CDCl}_3$ )  $\delta$  8.39 (dd,  $J = 8.4, 1.1$  Hz, 1H), 8.21 – 8.14 (m, 2H), 8.04 (s, 1H), 7.89 (d,  $J = 8.3$  Hz, 1H), 7.69 (ddd,  $J = 8.2, 6.8, 1.2$  Hz, 1H), 7.58 (ddd,  $J = 8.3, 6.8, 1.2$  Hz, 1H), 7.51 (dd,  $J = 8.4, 6.9$  Hz, 2H), 7.45 – 7.27 (m, 6H), 5.24 (s, 2H), 4.67 (s, 2H); All characterization data match those reported in the literature.<sup>5</sup>

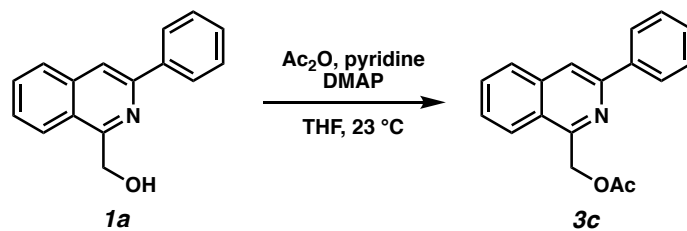

**(3-phenylisoquinolin-1-yl)methyl acetate (3c):** To a 20-mL scintillation vial containing a magnetic stir bar and isoquinoline **1a** (165 mg, 0.70 mmol) in THF (7 mL, 0.1 M) was added DMAP (8.6 mg, 0.07 mmol, 0.1 equiv) and pyridine (0.14 mL, 1.75 mmol, 2.5 equiv). Acetic anhydride (0.1 mL, 1.05 mmol, 1.5 equiv) was then added dropwise. The reaction mixture was stirred overnight at room temperature then diluted with  $\text{Et}_2\text{O}$  and washed with saturated aqueous  $\text{NH}_4\text{Cl}$ . The organic phase was collected, dried over  $\text{Na}_2\text{SO}_4$  and concentrated in vacuo. The crude product was purified by column chromatography (10% EtOAc in hexanes) to afford **3c** as a colorless viscous oil (194 mg, >99% yield):  $^1\text{H NMR}$  (400 MHz,  $\text{CDCl}_3$ )  $\delta$  8.19 – 8.13 (m, 2H), 8.11 (dd,  $J = 8.4, 1.0$  Hz, 1H), 8.07 (s, 1H), 7.92 (dt,  $J = 8.3, 0.9$  Hz, 1H), 7.71 (ddd,  $J =$

8.2, 6.8, 1.2 Hz, 1H), 7.61 (ddd,  $J = 8.2, 6.8, 1.3$  Hz, 1H), 7.54 – 7.47 (m, 2H), 7.45 – 7.38 (m, 1H), 5.79 (s, 2H), 2.20 (s, 3H); All characterization data match those reported in the literature.<sup>5</sup>

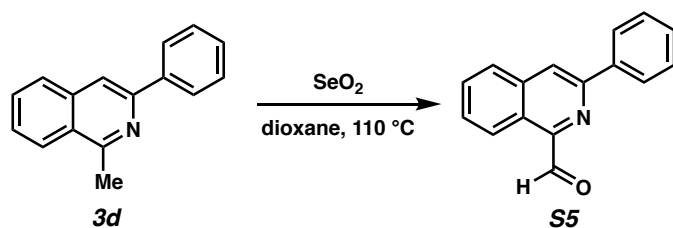

**3-phenylisoquinoline-1-carbaldehyde (S5):** To a Schlenk flask containing a magnetic stir bar was added  $\text{SeO}_2$  (140 mg, 1.26 mmol, 2 equiv) and a solution of isoquinoline **3d** (138 mg, 0.63 mmol) in 1,4-dioxane (13 mL, 0.05 M). The reaction vial was then sealed and heated to  $110\text{ }^\circ\text{C}$  while stirring for 2 hours. The reaction mixture was then cooled to  $23\text{ }^\circ\text{C}$  and filtered through celite with EtOAc. The crude product was then purified by column chromatography (5% EtOAc in hexanes) to afford **S5** as a pale yellow solid (1.32 g, 96% yield):  $^1\text{H}$  NMR (400 MHz,  $\text{CDCl}_3$ )  $\delta$  10.50 (s, 1H), 9.32 (d,  $J = 8.2$  Hz, 1H), 8.31 (s, 1H), 8.24 (d,  $J = 8.1$  Hz, 2H), 7.97 (d,  $J = 7.3$  Hz, 1H), 7.84 – 7.67 (m, 2H), 7.56 (t,  $J = 7.5$  Hz, 2H), 7.47 (t,  $J = 7.4$  Hz, 1H); All characterization data match those reported in the literature.<sup>5</sup>

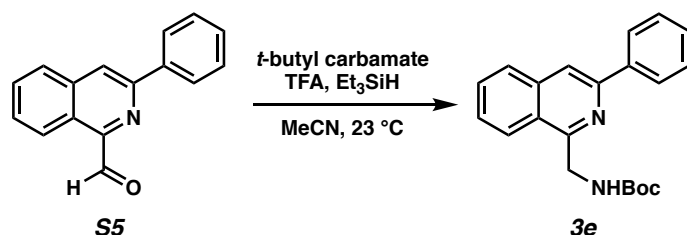

***tert*-butyl ((3-phenylisoquinolin-1-yl)methyl)carbamate (3e):** This procedure has been adapted from a previous report.<sup>7</sup> To a solution of aldehyde **S5** (196 mg, 0.84 mmol) and *t*-butyl carbamate (197 mg, 1.68 mmol, 2 equiv) in MeCN (8 mL, 0.1 M) were added trifluoroacetic acid (0.2 mL, 2.52 mmol, 3 equiv) and triethylsilane (1.3 mL, 8.4 mmol, 10 equiv). The reaction mixture was stirred at  $23\text{ }^\circ\text{C}$  overnight and then quenched with saturated aqueous  $\text{Na}_2\text{CO}_3$  and extracted with EtOAc (2 x 20 mL). The combined organic phases were washed with brine, dried over  $\text{Na}_2\text{SO}_4$  and concentrated in vacuo. The crude product was purified by column chromatography (15% EtOAc in hexanes) to afford **3e** as a white solid (225 mg, 80% yield):  $^1\text{H}$  NMR (400 MHz,  $\text{CDCl}_3$ )  $\delta$  8.16 (d,  $J = 7.7$  Hz, 2H), 8.10 (d,  $J = 8.4$  Hz, 1H), 8.00 (s, 1H), 7.90 (d,  $J = 8.2$  Hz, 1H), 7.70 (ddd,  $J = 8.1, 6.9, 1.1$  Hz, 1H), 7.61 (ddd,  $J = 8.2, 6.9, 1.2$  Hz, 1H), 7.53 (t,  $J = 7.6$  Hz, 2H), 7.48 – 7.40 (m, 1H), 6.43 (br s, 1H), 5.03 (d,  $J = 4.4$  Hz, 2H), 1.54 (s, 9H); All characterization data match those reported in the literature.<sup>5</sup>

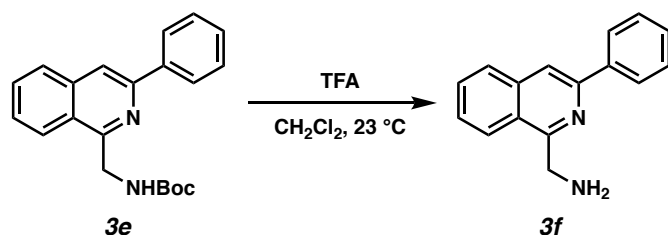

**(3-phenylisoquinolin-1-yl)methanamine (3f):** To a solution of carbamate **3e** (225 mg, 0.67 mmol) in CH<sub>2</sub>Cl<sub>2</sub> (2.2 mL, 0.3 M) was added trifluoroacetic acid (1.03 mL, 13.48 mmol, 20 equiv). The reaction was stirred at 23 °C for 1 hour and then neutralized to neutral pH with 1M NaOH. The organic phase was washed with water and extracted with CH<sub>2</sub>Cl<sub>2</sub> (2 x 20 mL), then dried over Na<sub>2</sub>SO<sub>4</sub> and concentrated in vacuo. The crude product was purified by column chromatography (5% MeOH in CH<sub>2</sub>Cl<sub>2</sub> with 1% NEt<sub>3</sub>) to afford **3f** as a yellow solid (113 mg, 72% yield): <sup>1</sup>H NMR (400 MHz, CDCl<sub>3</sub>) δ 8.21 – 8.18 (m, 2H), 8.09 (d, *J* = 8.5 Hz, 1H), 7.97 (s, 1H), 7.88 (d, *J* = 7.8 Hz, 1H), 7.68 (ddd, *J* = 8.2, 6.9, 1.2 Hz, 1H), 7.58 (ddd, *J* = 8.2, 6.9, 1.3 Hz, 1H), 7.53 – 7.49 (m, 2H), 7.44 – 7.39 (m, 1H), 4.56 (s, 2H), 2.31 (br s, 2H); <sup>13</sup>C NMR (100 MHz, CDCl<sub>3</sub>) δ 159.9, 149.5, 139.6, 137.1, 130.3, 128.9, 128.6, 128.0, 127.2, 127.0, 125.2, 124.1, 115.7, 44.6; IR (Neat Film, NaCl) 3276, 3054, 2968, 2924, 1622, 1574, 1501, 1456, 1439, 1365, 1326, 1201, 882, 784, 766, 694 cm<sup>-1</sup>; HRMS (MM:ESI-APCI+) *m/z* calc'd for C<sub>16</sub>H<sub>15</sub>N<sub>2</sub> [M+H]<sup>+</sup>: 235.1235, found 235.1231.

### General Procedure 5: Hydrogenation Reactions

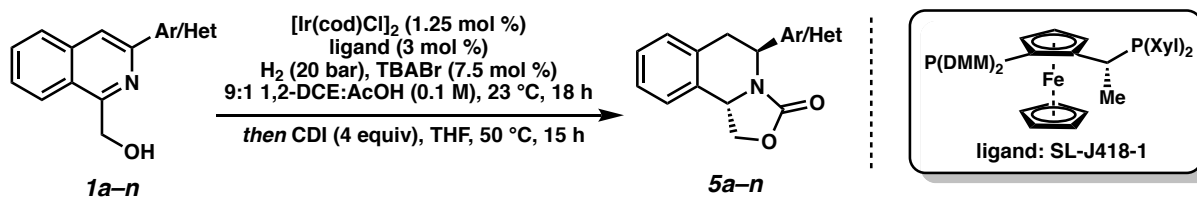

An oven-dried 20-mL scintillation vial containing a magnetic stir bar and an isoquinoline substrate (0.2 mmol) was capped with a PTFE-lined septum and pierced with two 21-gauge needles. The vials were then placed in a Parr bomb and brought into a N<sub>2</sub>-filled glovebox, with the exception of the pressure gauge. In a nitrogen-filled glovebox, a solution of the ligand (SL-J418-1) (4.53 mg, 0.006 mmol per reaction) and [Ir(cod)Cl]<sub>2</sub> (1.68 mg, 0.0025 mmol per reaction) in 1,2-DCE (1.8 mL per reaction) was prepared and allowed to stand for 10 minutes. Meanwhile, a solution of TBABr (4.83 mg, 0.015 mmol per reaction) in AcOH (0.2 mL per reaction) was prepared in a 1-dram vial, and 0.2 mL of the solution was added to each reaction vial by syringe. Afterwards, 1.8 mL of the homogeneous iridium catalyst solution was added to each reaction vial by syringe. After re-capping the vials with caps equipped with needles, the reaction vials were placed in the bomb and the top was covered tightly with plastic wrap secured by a rubber band. The bomb was then removed from the glovebox, and the pressure gauge was quickly screwed in place and tightened. The bomb was charged to 5-10 bar H<sub>2</sub> and slowly released. This process was repeated two more times, before charging the bomb to 20 bar of H<sub>2</sub> (or 60 bar H<sub>2</sub>). The bomb was then left stirring at 200 rpm at 23 °C (or placed in an oil bath and

heated to 60 °C) for 18 hours. Then, the bomb was removed from the stir plate and the hydrogen pressure was vented. The reaction vials were removed from the bomb and each solution was basified by the addition of saturated aqueous K<sub>2</sub>CO<sub>3</sub> (2 mL). The layers were separated and the aqueous layer was extracted with EtOAc (3 x 2 mL). The combined organics layers were then dried over Na<sub>2</sub>SO<sub>4</sub> and concentrated in vacuo. The diastereoselectivity of the hydrogenation reaction was determined by crude <sup>1</sup>H NMR analysis.

Then, to a scintillation vial containing the crude reaction mixture in THF (0.05 M) was added 1,1'-carbonyldiimidazole (CDI) (130 mg, 0.8 mmol, 4 equiv) and heated at 50 °C for 15 hours. The reaction mixture was then cooled to 23 °C, concentrated, and purified by column chromatography to separate the diastereomers and isolate the *trans*-product.

*Please note* that the NMR data listed is for the major diastereomer. The enantiomeric excess was determined by chiral SFC analysis of the *trans*-product (see Table S3). The absolute configuration was determined for compound **5a** via X-ray crystallographic analysis, and the absolute configuration for all other products has been inferred by analogy.

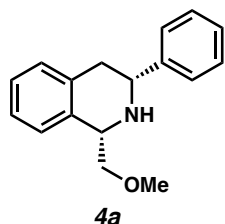

**(1S,3R)-1-(methoxymethyl)-3-phenyl-1,2,3,4-tetrahydroisoquinoline (4a):** Compound **4a** was prepared from isoquinoline **3a** using general procedure 5 and determined by <sup>1</sup>H NMR spectroscopy of the crude reaction mixture to consist of a mixture of diastereomers; (dr = 17:1); <sup>1</sup>H NMR (400 MHz, CDCl<sub>3</sub>) δ 7.48 – 7.46 (m, 2H), 7.39 – 7.35 (m, 2H), 7.32 – 7.27 (m, 1H), 7.25 – 7.20 (m, 1H), 7.20 – 7.15 (m, 2H), 7.16 – 7.10 (m, 1H), 4.45 – 4.42 (m, 1H), 4.07 – 3.94 (m, 2H), 3.59 (t, *J* = 8.7 Hz, 1H), 3.43 (s, 3H), 3.06 (dd, *J* = 16.0, 11.1 Hz, 1H), 2.92 (dd, *J* = 16.0, 3.6 Hz, 1H); All characterization data match those reported in the literature.<sup>5</sup>

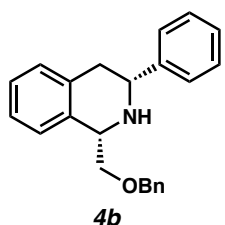

**(1S,3R)-1-((benzyloxy)methyl)-3-phenyl-1,2,3,4-tetrahydroisoquinoline (4b):** Compound **4b** was prepared from isoquinoline **3b** using general procedure 5 and determined by <sup>1</sup>H NMR spectroscopy of the crude reaction mixture to consist of a mixture of diastereomers; (dr = >20:1); <sup>1</sup>H NMR (400 MHz, CDCl<sub>3</sub>) δ 7.48 – 7.46 (m, 2H), 7.40 – 7.34 (m, 6H), 7.32 – 7.28 (m, 2H), 7.22 – 7.16 (m, 3H), 7.14 – 7.11 (m, 1H), 4.61 (s, 2H), 4.48 (dd, *J* = 8.7, 3.4 Hz, 1H), 4.12 (dd, *J*

= 9.0, 3.6 Hz, 1H), 4.04 (dd,  $J = 11.1, 3.5$  Hz, 1H), 3.67 (t,  $J = 8.7$  Hz, 1H), 3.05 (dd,  $J = 15.9, 11.1$  Hz, 1H), 2.91 (dd,  $J = 15.8, 3.5$  Hz, 1H); All characterization data match those reported in the literature.<sup>5</sup>

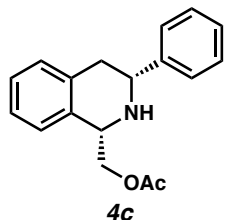

**((1*S*,3*R*)-3-phenyl-1,2,3,4-tetrahydroisoquinolin-1-yl)methyl acetate (4c):** Compound **4c** was prepared from isoquinoline **3c** using general procedure 5 and determined by <sup>1</sup>H NMR spectroscopy of the crude reaction mixture to consist of a mixture of diastereomers; (dr = >20:1); <sup>1</sup>H NMR (400 MHz, CDCl<sub>3</sub>) δ 7.51 – 7.45 (m, 2H), 7.41 – 7.37 (m, 2H), 7.34 – 7.30 (m, 1H), 7.27 – 7.24 (m, 1H), 7.23 – 7.18 (m, 2H), 7.16 – 7.10 (m, 1H), 4.78 (dd,  $J = 10.8, 3.5$  Hz, 1H), 4.54 – 4.51 (m, 1H), 4.14 (dd,  $J = 10.8, 8.7$  Hz, 1H), 4.05 (dd,  $J = 11.1, 3.4$  Hz, 1H), 3.08 – 3.01 (m, 1H), 2.90 (dd,  $J = 15.5, 3.6$  Hz, 1H), 2.08 (s, 3H); All characterization data match those reported in the literature.<sup>5</sup>

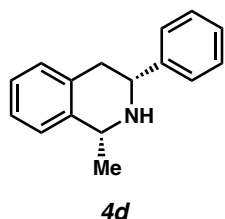

**(1*R*,3*R*)-1-methyl-3-phenyl-1,2,3,4-tetrahydroisoquinoline (4d):** Compound **4d** was prepared from isoquinoline **3d** using general procedure 5 and determined by <sup>1</sup>H NMR spectroscopy of the crude reaction mixture to consist of a mixture of diastereomers; (dr = >20:1); <sup>1</sup>H NMR (400 MHz, CDCl<sub>3</sub>) δ 7.49 – 7.46 (m, 2H), 7.41 – 7.37 (m, 2H), 7.33 – 7.29 (m, 1H), 7.28 – 7.23 (m, 1H), 7.23 – 7.14 (m, 2H), 7.11 (d,  $J = 6.9$  Hz, 1H), 4.34 (q,  $J = 6.6$  Hz, 1H), 4.08 (dd,  $J = 11.1, 3.9$  Hz, 1H), 3.12 – 3.01 (m, 1H), 2.96 (dd,  $J = 16.2, 4.1$  Hz, 1H), 1.55 (d,  $J = 6.5$  Hz, 3H); All characterization data match those reported in the literature.<sup>5</sup>

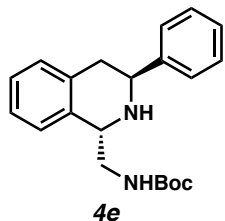

**tert-butyl (((1*S*,3*R*)-3-phenyl-1,2,3,4-tetrahydroisoquinolin-1-yl)methyl)carbamate (4e):** Compound **4e** was prepared from isoquinoline **3e** using general procedure 5 and determined by <sup>1</sup>H NMR spectroscopy of the crude reaction mixture as a mixture of diastereomers; (dr = 1.4:1);



25% ee for major diastereomer;  $[\alpha]_{\text{D}}^{25} -1.3$  ( $c$  0.53,  $\text{CHCl}_3$ ); Major diastereomer:  $^1\text{H}$  NMR (400 MHz,  $\text{CDCl}_3$ )  $\delta$  7.47 – 7.45 (m, 2H), 7.40 – 7.36 (m, 2H), 7.32 – 7.28 (m, 1H), 7.20 – 7.18 (m, 3H), 7.14 – 7.12 (m, 1H), 5.12 (br s, 1H), 4.18 (dd,  $J = 10.7, 4.0$  Hz, 1H), 3.59 – 3.54 (m, 1H), 3.39 (ddd,  $J = 14.2, 10.7, 4.9$  Hz, 1H), 3.02 (dd,  $J = 16.3, 4.2$  Hz, 1H), 2.94 (dd,  $J = 16.3, 10.8$  Hz, 1H), 1.44 (s, 9H);  $^{13}\text{C}$  NMR (100 MHz,  $\text{CDCl}_3$ )  $\delta$  155.0, 142.8, 134.5, 134.3, 128.2, 127.6, 126.4, 126.0, 125.7, 125.7, 125.1, 55.2, 50.1, 43.6, 36.1, 28.9, 27.4; IR (Neat Film, NaCl) 3733, 3330, 2924, 2368, 2335, 1699, 1492, 1394, 1366, 1268, 1258, 1171, 754  $\text{cm}^{-1}$ ; HRMS (MM:ESI-APCI+)  $m/z$  calc'd for  $\text{C}_{21}\text{H}_{27}\text{N}_2\text{O}_2$   $[\text{M}+\text{H}]^+$ : 339.2073, found 339.2075; SFC Conditions: 30% IPA, 2.5 mL/min, Chiralpak AD-H column,  $\lambda = 210$  nm,  $t_{\text{R}}$  (min): major = 1.95, minor = 4.28.

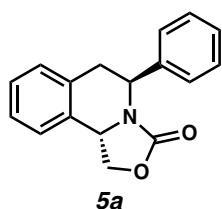

**(5S,10bS)-5-phenyl-1,5,6,10b-tetrahydro-3H-oxazolo[4,3-a]isoquinolin-3-one (5a):**

Compound **5a** was prepared from isoquinoline **1a** using general procedure 5 and purified by column chromatography (20% to 40% to 60% EtOAc in hexanes) to provide a clear solid (33 mg, 63% yield); 91% ee;  $[\alpha]_{\text{D}}^{25} +124.3$  ( $c$  1.04,  $\text{CHCl}_3$ );  $^1\text{H}$  NMR (400 MHz,  $\text{CDCl}_3$ )  $\delta$  7.28 – 7.19 (m, 8H), 6.91 (d,  $J = 7.3$  Hz, 1H), 5.31 (dd,  $J = 6.7, 2.8$  Hz, 1H), 4.74 (t,  $J = 8.0$  Hz, 1H), 4.69 – 4.66 (m, 1H), 4.29 (dd,  $J = 7.8, 5.9$  Hz, 1H), 3.41 (dd,  $J = 16.8, 6.7$  Hz, 1H), 3.22 (dd,  $J = 16.7, 2.8$  Hz, 1H);  $^{13}\text{C}$  NMR (100 MHz,  $\text{CDCl}_3$ )  $\delta$  157.5, 138.8, 134.4, 133.2, 129.4, 128.8, 128.1, 127.9, 127.2, 127.2, 124.4, 68.7, 51.7, 51.5, 31.4; IR (Neat Film, NaCl) 2910, 1751, 1601, 1494, 1452, 1402, 1221, 1114, 1066, 1030, 758, 701  $\text{cm}^{-1}$ ; HRMS (MM:ESI-APCI+)  $m/z$  calc'd for  $\text{C}_{17}\text{H}_{16}\text{NO}_2$   $[\text{M}+\text{H}]^+$ : 266.1176, found 266.1177; SFC Conditions: 40% MeOH, 3.5 mL/min, Chiralpak IC column,  $\lambda = 210$  nm,  $t_{\text{R}}$  (min): major = 2.61, minor = 2.41.

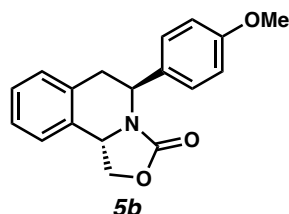

**(5S,10bS)-5-(4-methoxyphenyl)-1,5,6,10b-tetrahydro-3H-oxazolo[4,3-a]isoquinolin-3-one (5b):**

Compound **5b** was prepared from isoquinoline **1b** using general procedure 5 and purified by column chromatography (20% to 30% to 40% EtOAc in hexanes) to provide a pale yellow oil (38 mg, 64% yield); 96% ee;  $[\alpha]_{\text{D}}^{25} +150.4$  ( $c$  1.01,  $\text{CHCl}_3$ );  $^1\text{H}$  NMR (400 MHz,  $\text{CDCl}_3$ )  $\delta$  7.29 – 7.24 (m, 3H), 7.22 – 7.20 (m, 2H), 6.94 (d,  $J = 8.0$  Hz, 1H), 6.82 – 6.78 (m, 2H), 5.32 (dd,  $J = 6.7, 2.4$  Hz, 1H), 4.77 (t,  $J = 8.0$  Hz, 1H), 4.71 – 4.67 (m, 1H), 4.30 (dd,  $J = 8.0, 6.2$  Hz, 1H), 3.75 (s, 3H), 3.44 (dd,  $J = 16.6, 6.8$  Hz, 1H), 3.23 (dd,  $J = 16.7, 2.5$  Hz, 1H);  $^{13}\text{C}$  NMR (100 MHz,  $\text{CDCl}_3$ )  $\delta$  159.1, 157.4, 134.4, 133.2, 130.7, 129.4, 128.4, 128.1, 127.2, 124.5, 114.1, 68.8,

55.3, 51.6, 50.8, 31.4; IR (Neat Film, NaCl) 2907, 2836, 1750, 1610, 1513, 1402, 1304, 1251, 1178, 1066, 1030, 828, 756  $\text{cm}^{-1}$ ; HRMS (MM:ESI-APCI+)  $m/z$  calc'd for  $\text{C}_{18}\text{H}_{18}\text{NO}_3$   $[\text{M}+\text{H}]^+$ : 296.1281, found 296.1280; SFC Conditions: 10% MeOH, 3.5 mL/min, Chiralcel OJ-H column,  $\lambda$  = 210 nm,  $t_R$  (min): major = 8.66, minor = 7.52.

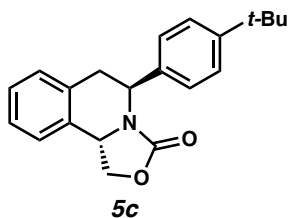

**(5S,10bS)-5-(4-(tert-butyl)phenyl)-1,5,6,10b-tetrahydro-3H-oxazolo[4,3-a]isoquinolin-3-one (5c):** Compound **5c** was prepared from isoquinoline **1c** using general procedure 5 and purified by column chromatography (20% to 30% to 40% EtOAc in hexanes) to provide a clear oil (43 mg, 67% yield); 95% ee;  $[\alpha]_D^{25} +115.6$  ( $c$  1.01,  $\text{CHCl}_3$ );  $^1\text{H}$  NMR (400 MHz,  $\text{CDCl}_3$ )  $\delta$  7.29 – 7.26 (m, 4H), 7.24 – 7.22 (m, 1H), 7.21 – 7.19 (m, 2H), 6.93 (d,  $J$  = 7.2 Hz, 1H), 5.31 (dd,  $J$  = 6.8, 2.5 Hz, 1H), 4.74 (t,  $J$  = 8.0 Hz, 1H), 4.72 – 4.68 (m, 1H), 4.29 (dd,  $J$  = 7.3, 5.3 Hz, 1H), 3.42 (dd,  $J$  = 16.6, 6.9 Hz, 1H), 3.23 (dd,  $J$  = 16.7, 2.6 Hz, 1H), 1.24 (s, 9H);  $^{13}\text{C}$  NMR (100 MHz,  $\text{CDCl}_3$ )  $\delta$  157.5, 150.8, 135.7, 134.5, 133.4, 129.4, 128.1, 127.1, 126.9, 125.7, 124.5, 68.7, 51.6, 51.1, 34.6, 31.4, 31.3; IR (Neat Film, NaCl) 3010, 2962, 1754, 1455, 1401, 1267, 1215, 1115, 1068, 1026, 828, 757  $\text{cm}^{-1}$ ; HRMS (MM:ESI-APCI+)  $m/z$  calc'd for  $\text{C}_{21}\text{H}_{24}\text{NO}_2$   $[\text{M}+\text{H}]^+$ : 322.1802, found 322.1801; SFC Conditions: 20% MeOH, 3.5 mL/min, Chiralpak AD-H column,  $\lambda$  = 210 nm,  $t_R$  (min): major = 5.04, minor = 5.44.

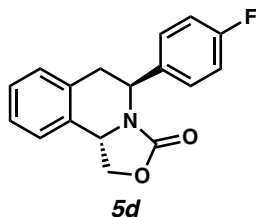

**(5S,10bS)-5-(4-fluorophenyl)-1,5,6,10b-tetrahydro-3H-oxazolo[4,3-a]isoquinolin-3-one (5d):** Compound **5d** was prepared from isoquinoline **1d** using general procedure 5 and purified by column chromatography (20% to 30% to 40% EtOAc in hexanes) to provide a clear oil (40 mg, 70% yield); 95% ee;  $[\alpha]_D^{25} +150.5$  ( $c$  1.01,  $\text{CHCl}_3$ );  $^1\text{H}$  NMR (400 MHz,  $\text{CDCl}_3$ )  $\delta$  7.28 – 7.21 (m, 5H), 6.96 – 6.91 (m, 3H), 5.29 (dd,  $J$  = 6.8, 2.8 Hz, 1H), 4.76 (t,  $J$  = 8 Hz, 1H), 4.67 (ddd,  $J$  = 8.7, 6.2, 1.1 Hz, 1H), 4.30 (dd,  $J$  = 8.1, 6.2 Hz, 1H), 3.42 (ddd,  $J$  = 16.7, 6.6, 1.3 Hz, 1H), 3.19 (dd,  $J$  = 16.7, 2.9 Hz, 1H);  $^{13}\text{C}$  NMR (100 MHz,  $\text{CDCl}_3$ )  $\delta$  162.3 (d,  $J$  = 246.8 Hz), 157.5, 134.6 (d,  $J$  = 3.3 Hz), 134.3, 132.9, 129.4, 129.0 (d,  $J$  = 8.1 Hz), 128.3, 127.4, 124.5, 115.7 (d,  $J$  = 21.5 Hz), 68.7, 51.6, 50.9, 31.6;  $^{19}\text{F}$  NMR (282 MHz,  $\text{CDCl}_3$ )  $\delta$  -114.4 – -114.5 (m); IR (Neat Film, NaCl) 2910, 1753, 1605, 1510, 1402, 1223, 1161, 1068, 1043, 1029, 885, 828, 758, 745  $\text{cm}^{-1}$ ; HRMS (MM:ESI-APCI+)  $m/z$  calc'd for  $\text{C}_{17}\text{H}_{15}\text{FNO}_2$   $[\text{M}+\text{H}]^+$ : 284.1081, found 284.1078; SFC

Conditions: 35% MeOH, 3.5 mL/min, Chiralpak IC column,  $\lambda = 210$  nm,  $t_R$  (min): minor = 2.39, major = 2.58.

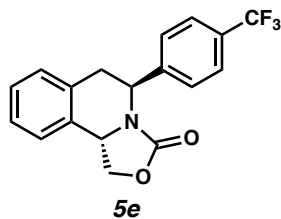

**(5*S*,10*bS*)-5-(4-(trifluoromethyl)phenyl)-1,5,6,10*b*-tetrahydro-3*H*-oxazolo[4,3-*a*]isoquinolin-3-one (5e):** Compound **5e** was prepared from isoquinoline **1e** using general procedure 5 and purified by column chromatography (20% to 30% to 40% EtOAc in hexanes) to provide a white solid (43 mg, 64% yield); 91% ee;  $[\alpha]_D^{25} +118.2$  (*c* 1.02, CHCl<sub>3</sub>); <sup>1</sup>H NMR (400 MHz, CDCl<sub>3</sub>)  $\delta$  7.56 (d, *J* = 8.2 Hz, 2H), 7.45 (d, *J* = 8.0 Hz, 2H), 7.32 – 7.26 (m, 3H), 7.00 – 6.97 (m, 1H), 5.35 (dd, *J* = 6.7, 3.4 Hz, 1H), 4.82 (t, *J* = 8.0 Hz, 1H), 4.76 – 4.72 (m, 1H), 4.38 (dd, *J* = 8.1, 5.9 Hz, 1H), 3.47 (ddd, *J* = 16.6, 6.6, 1.2 Hz, 1H), 3.24 (dd, *J* = 16.6, 3.5 Hz, 1H); <sup>13</sup>C NMR (100 MHz, CDCl<sub>3</sub>)  $\delta$  157.6, 143.0, 143.0, 134.2, 132.7, 130.2 (q, *J* = 32.6 Hz), 129.3, 128.4, 127.5, 125.9 (q, *J* = 3.8 Hz), 124.4, 124.0 (q, *J* = 271.0 Hz), 68.6, 51.8, 51.5, 31.6; <sup>19</sup>F NMR (282 MHz, CDCl<sub>3</sub>)  $\delta$  62.7; IR (Neat Film, NaCl) 2916, 1753, 1620, 1402, 1326, 1225, 1162, 1114, 1068, 1017, 889, 829, 757 cm<sup>-1</sup>; HRMS (MM:ESI-APCI+) *m/z* calc'd for C<sub>18</sub>H<sub>15</sub>F<sub>3</sub>NO<sub>2</sub> [M+H]<sup>+</sup>: 334.1049, found 334.1048; SFC Conditions: 25% MeOH, 3.5 mL/min, Chiralpak IC column,  $\lambda = 210$  nm,  $t_R$  (min): minor = 2.22, major = 2.37.

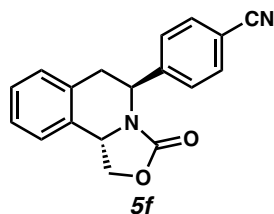

**4-((5*S*,10*bS*)-3-oxo-1,5,6,10*b*-tetrahydro-3*H*-oxazolo[4,3-*a*]isoquinolin-5-yl)benzonitrile (5f):** Compound **5f** was prepared from isoquinoline **1f** using general procedure 5 and purified by column chromatography (25% to 35% to 50% EtOAc in hexanes) to provide a white solid (27 mg, 47% yield); 83% ee;  $[\alpha]_D^{25} +112.3$  (*c* 1.00, CHCl<sub>3</sub>); <sup>1</sup>H NMR (400 MHz, CDCl<sub>3</sub>)  $\delta$  7.61 – 7.58 (m, 2H), 7.46 – 7.43 (m, 2H), 7.32 – 7.27 (m, 3H), 7.01 – 6.99 (m, 1H), 5.31 (dd, *J* = 6.5, 3.8 Hz, 1H), 4.83 (t, *J* = 8.4 Hz, 1H), 4.76 – 4.72 (m, 1H), 4.40 (dd, *J* = 8.3, 5.9 Hz, 1H), 3.45 (dd, *J* = 16.5, 6.4 Hz, 1H), 3.20 (dd, *J* = 16.6, 3.9 Hz, 1H); <sup>13</sup>C NMR (100 MHz, CDCl<sub>3</sub>)  $\delta$  157.6, 144.5, 134.1, 132.7, 132.5, 129.3, 128.5, 127.9, 127.7, 124.3, 118.6, 111.9, 68.5, 51.9, 51.8, 31.7; IR (Neat Film, NaCl) 2909, 2228, 1747, 1679, 1608, 1402, 1224, 1160, 1114, 1043, 1031, 829, 764, 733 cm<sup>-1</sup>; HRMS (MM:ESI-APCI+) *m/z* calc'd for C<sub>18</sub>H<sub>15</sub>N<sub>2</sub>O<sub>2</sub> [M+H]<sup>+</sup>: 291.1134, found 291.1137; SFC Conditions: 40% MeOH, 3.5 mL/min, Chiralpak IC column,  $\lambda = 210$  nm,  $t_R$  (min): minor = 3.97, major = 4.48.

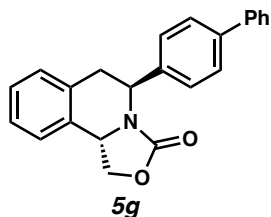

**(5S,10bS)-5-([1,1'-biphenyl]-4-yl)-1,5,6,10b-tetrahydro-3H-oxazolo[4,3-a]isoquinolin-3-one (5g):** Compound **5g** was prepared from isoquinoline **1g** using general procedure 5 and purified by column chromatography (20% to 30% to 40% EtOAc in hexanes) to provide a white solid (38 mg, 56% yield); 75% ee;  $[\alpha]_{\text{D}}^{25} +108.5$  (*c* 1.01, CHCl<sub>3</sub>); <sup>1</sup>H NMR (400 MHz, CDCl<sub>3</sub>) δ 7.55 – 7.51 (m, 4H), 7.44 – 7.37 (m, 4H), 7.36 – 7.31 (m, 3H), 7.30 – 7.25 (m, 1H), 6.98 (d, *J* = 7.1 Hz, 1H), 5.40 (dd, *J* = 6.7, 2.8 Hz, 1H), 4.83 – 4.76 (m, 2H), 4.39 – 4.32 (m, 1H), 3.49 (dd, *J* = 16.7, 6.7 Hz, 1H), 3.31 (dd, *J* = 16.7, 2.8 Hz, 1H); <sup>13</sup>C NMR (100 MHz, CDCl<sub>3</sub>) δ 157.5, 140.8, 140.6, 137.8, 134.4, 133.2, 129.4, 128.9, 128.2, 127.6, 127.6, 127.5, 127.3, 127.1, 124.5, 68.7, 51.7, 51.3, 31.5; IR (Neat Film, NaCl) 3028, 2908, 1751, 1487, 1454, 1402, 1220, 1162, 1070, 1042, 886, 830, 760 cm<sup>-1</sup>; HRMS (MM:ESI-APCI+) *m/z* calc'd for C<sub>23</sub>H<sub>20</sub>NO<sub>2</sub> [M+H]<sup>+</sup>: 342.1489, found 342.1501; SFC Conditions: 45% MeOH, 3.5 mL/min, Chiralcel OJ-H column, λ = 210 nm, *t*<sub>R</sub> (min): minor = 5.72, major = 6.80.

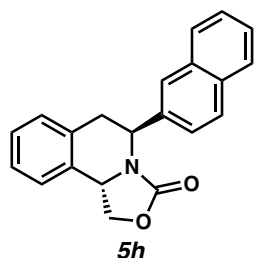

**(5S,10bS)-5-(naphthalen-2-yl)-1,5,6,10b-tetrahydro-3H-oxazolo[4,3-a]isoquinolin-3-one (5h):** Compound **5h** was prepared from isoquinoline **1h** using general procedure 5 and purified by column chromatography (20% to 30% to 40% EtOAc in hexanes) to provide a pale white solid (34 mg, 54% yield); 89% ee;  $[\alpha]_{\text{D}}^{25} +91.3$  (*c* 1.00, CHCl<sub>3</sub>); <sup>1</sup>H NMR (400 MHz, CDCl<sub>3</sub>) δ 7.82 – 7.79 (m, 2H), 7.73 – 7.70 (m, 1H), 7.68 (s, 1H), 7.50 (dd, *J* = 8.6, 1.9 Hz, 1H), 7.47 – 7.42 (m, 2H), 7.38 – 7.30 (m, 2H), 7.27 – 7.23 (m, 1H), 6.93 (d, *J* = 8.0 Hz, 1H), 5.52 (dd, *J* = 6.5, 3.2 Hz, 1H), 4.79 (t, *J* = 8.0 Hz, 1H), 4.74 – 4.70 (m, 1H), 4.35 (dd, *J* = 8.0, 6.0 Hz, 1H), 3.54 (dd, *J* = 16.7, 6.6 Hz, 1H), 3.41 (dd, *J* = 16.8, 2.9 Hz, 1H); <sup>13</sup>C NMR (100 MHz, CDCl<sub>3</sub>) δ 157.6, 136.1, 134.4, 133.2, 133.1, 132.9, 129.4, 128.8, 128.2, 128.1, 127.7, 127.2, 126.4, 126.3, 125.9, 125.4, 124.5, 68.8, 51.8, 51.6, 31.3; IR (Neat Film, NaCl) 3017, 1750, 1454, 1401, 1327, 1215, 1070, 1030, 818, 756 cm<sup>-1</sup>; HRMS (MM:ESI-APCI+) *m/z* calc'd for C<sub>21</sub>H<sub>18</sub>NO<sub>2</sub> [M+H]<sup>+</sup>: 316.1332, found 316.1332; SFC Conditions: 40% MeOH, 3.5 mL/min, Chiralpak IC column, λ = 210 nm, *t*<sub>R</sub> (min): minor = 4.21, major = 4.61.

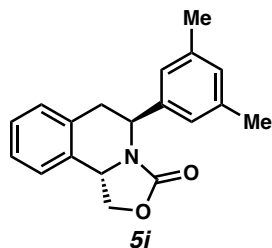

**(5*S*,10*bS*)-5-(3,5-dimethylphenyl)-1,5,6,10*b*-tetrahydro-3*H*-oxazolo[4,3-*a*]isoquinolin-3-one (5*i*):** Compound **5i** was prepared from isoquinoline **1i** using general procedure 5 and purified by column chromatography (10% to 20% to 30% to 40% EtOAc in hexanes) to provide a pale white solid (36 mg, 61% yield); 86% ee;  $[\alpha]_{\text{D}}^{25} +125.3$  (*c* 1.03, CHCl<sub>3</sub>); <sup>1</sup>H NMR (400 MHz, CDCl<sub>3</sub>)  $\delta$  7.30 – 7.23 (m, 3H), 6.97 (d, *J* = 7.1 Hz, 1H), 6.92 (s, 2H), 6.89 (s, 1H), 5.26 (dd, *J* = 6.7, 3.2 Hz, 1H), 4.82 – 4.75 (m, 2H), 4.39 – 4.32 (m, 1H), 3.42 (dd, *J* = 16.6, 6.7 Hz, 1H), 3.24 (dd, *J* = 16.6, 3.2 Hz, 1H), 2.25 (s, 6H); <sup>13</sup>C NMR (100 MHz, CDCl<sub>3</sub>)  $\delta$  157.5, 138.9, 138.3, 134.5, 133.4, 129.5, 129.3, 128.1, 127.1, 124.8, 124.3, 68.5, 51.8, 51.5, 31.7, 21.5; IR (Neat Film, NaCl) 3010, 2916, 1752, 1606, 1454, 1402, 1265, 1220, 1070, 1043, 1030, 758, 747 cm<sup>-1</sup>; HRMS (MM:ESI-APCI+) *m/z* calc'd for C<sub>19</sub>H<sub>20</sub>NO<sub>2</sub> [M+H]<sup>+</sup>: 294.1489, found 294.1489; SFC Conditions: 40% MeOH, 3.5 mL/min, Chiralpak IC column,  $\lambda$  = 210 nm, *t<sub>R</sub>* (min): minor = 2.47, major = 2.71.

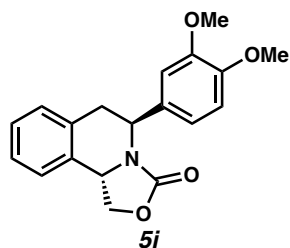

**(5*S*,10*bS*)-5-(3,4-dimethoxyphenyl)-1,5,6,10*b*-tetrahydro-3*H*-oxazolo[4,3-*a*]isoquinolin-3-one (5*j*):** Compound **5j** was prepared from isoquinoline **1j** using general procedure 5 and purified by column chromatography (40% to 50% to 75% EtOAc in hexanes) to provide a pale yellow oil (33 mg, 51% yield); 87% ee;  $[\alpha]_{\text{D}}^{25} +120.9$  (*c* 1.00, CHCl<sub>3</sub>); <sup>1</sup>H NMR (400 MHz, CDCl<sub>3</sub>)  $\delta$  7.30 – 7.28 (m, 2H), 7.27 – 7.23 (m, 1H), 6.95 (d, *J* = 6.8 Hz, 1H), 6.86 (d, *J* = 2.0 Hz, 1H), 6.75 (dd, *J* = 8.3, 2.0 Hz, 1H), 6.71 (d, *J* = 8.3 Hz, 1H), 5.32 (d, *J* = 6.7, 2.3 Hz, 1H), 4.78 (t, *J* = 8.0 Hz, 1H), 4.70 – 4.66 (m, 1H), 4.30 (dd, *J* = 8.1, 6.2 Hz, 1H), 3.81 (s, 3H), 3.79 (s, 3H), 3.45 (dd, *J* = 16.8, 6.5 Hz, 1H), 3.24 (dd, *J* = 16.8, 2.4 Hz, 1H); <sup>13</sup>C NMR (100 MHz, CDCl<sub>3</sub>)  $\delta$  157.4, 149.2, 148.7, 134.4, 133.3, 131.1, 129.3, 128.1, 127.2, 124.5, 119.1, 111.0, 110.9, 68.9, 56.0, 56.0, 51.6, 51.1, 31.4; IR (Neat Film, NaCl) 2929, 2836, 1748, 1592, 1516, 1403, 1259, 1237, 1142, 1026, 758, 749 cm<sup>-1</sup>; HRMS (MM:ESI-APCI+) *m/z* calc'd for C<sub>19</sub>H<sub>20</sub>NO<sub>4</sub> [M+H]<sup>+</sup>: 326.1387, found 326.1385; SFC Conditions: 40% MeOH, 3.5 mL/min, Chiralpak AD-H column,  $\lambda$  = 210 nm, *t<sub>R</sub>* (min): major = 2.13, minor = 2.74.

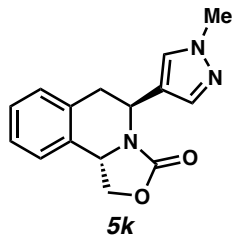

**(5*S*,10*bS*)-5-(1-methyl-1*H*-pyrazol-4-yl)-1,5,6,10*b*-tetrahydro-3*H*-oxazolo[4,3-*a*]isoquinolin-3-one (5k):** Compound **5k** was prepared from isoquinoline **1k** using general procedure 5 and purified by column chromatography (80% to 90% to 100% EtOAc in hexanes) to provide a pale yellow oil as a mixture of diastereomers (47 mg, 88% overall yield) (dr = 3.0:1); 97% ee for major diastereomer;  $[\alpha]_D^{25} +113.6$  (*c* 1.00, CHCl<sub>3</sub>); Major diastereomer: <sup>1</sup>H NMR (400 MHz, CDCl<sub>3</sub>) δ 7.28 (s, 1H), 7.27 – 7.21 (m, 3H), 7.17 (s, 1H), 6.96 – 6.94 (m, 1H), 5.34 (dd, *J* = 6.6, 2.0 Hz, 1H), 4.77 – 4.74 (m, 2H), 4.29 – 4.23 (m, 1H), 3.78 (s, 3H), 3.42 (dd, *J* = 16.5, 6.7 Hz, 1H), 3.03 (dd, *J* = 16.4, 1.9 Hz, 1H); <sup>13</sup>C NMR (100 MHz, CDCl<sub>3</sub>) δ 157.1, 138.1, 134.1, 132.8, 129.7, 128.8, 128.0, 127.3, 124.7, 119.7, 69.1, 51.5, 44.2, 39.1, 32.3; IR (Neat Film, NaCl) 2930, 1750, 1444, 1401, 1276, 1216, 1070, 1021, 988, 761, 751 cm<sup>-1</sup>; HRMS (MM:ESI-APCI+) *m/z* calc'd for C<sub>15</sub>H<sub>16</sub>N<sub>3</sub>O<sub>2</sub> [M+H]<sup>+</sup>: 270.1237, found 270.1238; SFC Conditions: 40% MeOH, 3.5 mL/min, Chiralpak AD-H column, λ = 210 nm, *t*<sub>R</sub> (min): minor = 2.24, major = 2.67.

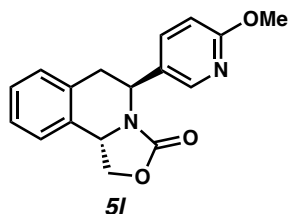

**(5*S*,10*bS*)-5-(6-methoxypyridin-3-yl)-1,5,6,10*b*-tetrahydro-3*H*-oxazolo[4,3-*a*]isoquinolin-3-one (5l):** Compound **5l** was prepared from isoquinoline **1l** using general procedure 5 and purified by column chromatography (25% to 35% to 50% EtOAc in hexanes) to provide a pale yellow oil (38 mg, 64% yield); 95% ee;  $[\alpha]_D^{25} +124.9$  (*c* 1.02, CHCl<sub>3</sub>); <sup>1</sup>H NMR (400 MHz, CDCl<sub>3</sub>) δ 8.03 (d, *J* = 2.6 Hz, 1H), 7.54 (dd, *J* = 8.7, 2.6 Hz, 1H), 7.29 – 7.27 (m, 2H), 7.25 – 7.23 (m, 1H), 6.95 (dd, *J* = 6.9 Hz, 1H), 6.68 (d, *J* = 8.6 Hz, 1H), 5.31 (dd, *J* = 6.7, 2.5 Hz, 1H), 4.78 (t, *J* = 8.0 Hz, 1H), 4.69 (dd, *J* = 8.8, 6.2 Hz, 1H), 4.31 (dd, *J* = 8.1, 6.0 Hz, 1H), 3.86 (s, 3H), 3.45 (dd, *J* = 16.7, 6.8 Hz, 1H), 3.21 (dd, *J* = 16.8, 2.5 Hz, 1H); <sup>13</sup>C NMR (100 MHz, CDCl<sub>3</sub>) δ 163.8, 157.4, 145.4, 138.3, 134.1, 132.6, 129.5, 128.3, 127.4, 126.9, 124.6, 111.3, 68.9, 53.5, 51.6, 49.3, 31.1; IR (Neat Film, NaCl) 2945, 1752, 1608, 1494, 1400, 1288, 1262, 1068, 1027, 827, 758, 742 cm<sup>-1</sup>; HRMS (MM:ESI-APCI+) *m/z* calc'd for C<sub>17</sub>H<sub>17</sub>N<sub>2</sub>O<sub>3</sub> [M+H]<sup>+</sup>: 297.1234, found 297.1236; SFC Conditions: 40% MeOH, 3.5 mL/min, Chiralpak AD-H column, λ = 210 nm, *t*<sub>R</sub> (min): minor = 2.80, major = 3.30.

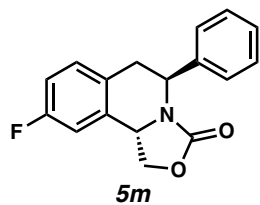

**(5S,10bS)-9-fluoro-5-phenyl-1,5,6,10b-tetrahydro-3H-oxazolo[4,3-a]isoquinolin-3-one (5m):** Compound **5m** was prepared from isoquinoline **1m** using general procedure 5 and purified by column chromatography (20% to 30% to 40% EtOAc in hexanes) to provide a white solid (38 mg, 67% yield); 95% ee;  $[\alpha]_D^{25} +163.7$  (*c* 1.00, CHCl<sub>3</sub>); <sup>1</sup>H NMR (400 MHz, CDCl<sub>3</sub>) δ 7.29 – 7.21 (m, 6H), 6.98 (td, *J* = 8.6, 2.5 Hz, 1H), 6.65 (dd, *J* = 8.9, 2.4 Hz, 1H), 5.33 (dd, *J* = 6.6, 2.7 Hz, 1H), 4.74 (t, *J* = 8.5 Hz, 1H), 4.67 – 4.63 (m, 1H), 4.28 (dd, *J* = 8.2, 5.9 Hz, 1H), 3.38 (dd, *J* = 16.6, 6.4 Hz, 1H), 3.22 (dd, *J* = 16.6, 2.8 Hz, 1H); <sup>13</sup>C NMR (100 MHz, CDCl<sub>3</sub>) δ 161.7 (d, *J* = 246.6 Hz), 157.4, 138.4, 136.1 (d, *J* = 6.6 Hz), 131.0 (d, *J* = 7.8 Hz), 128.9, 128.8 (d, *J* = 3.3 Hz), 128.0, 127.1, 115.4 (d, *J* = 21.3 Hz), 111.4 (d, *J* = 22.1 Hz), 68.4, 51.7 (d, *J* = 2.2 Hz), 51.4, 30.6; <sup>19</sup>F NMR (282 MHz, CDCl<sub>3</sub>) δ –114.3 – –114.4 (m); IR (Neat Film, NaCl) 3061, 2914, 1752, 1613, 1593, 1499, 1450, 1430, 1402, 1327, 1241, 1216, 1162, 1069, 1034, 868, 814, 756 cm<sup>-1</sup>; HRMS (MM:ESI-APCI+) *m/z* calc'd for C<sub>17</sub>H<sub>15</sub>FNO<sub>2</sub> [M+H]<sup>+</sup>: 284.1081, found 284.1083; SFC Conditions: 40% MeOH, 3.5 mL/min, Chiralpak IC column, λ = 210 nm, t<sub>R</sub> (min): minor = 2.09, major = 2.53.

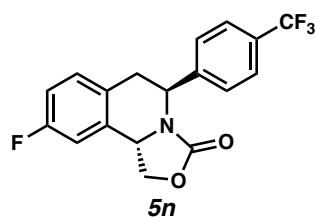

**(5S,10bS)-9-fluoro-5-(4-(trifluoromethyl)phenyl)-1,5,6,10b-tetrahydro-3H-oxazolo[4,3-a]isoquinolin-3-one (5n):** Compound **5n** was prepared from isoquinoline **1n** using general procedure 5 and purified by column chromatography (20% to 30% to 40% EtOAc in hexanes) to provide a pale yellow oil (38 mg, 54% yield); 92% ee;  $[\alpha]_D^{25} +115.7$  (*c* 1.02, CHCl<sub>3</sub>); <sup>1</sup>H NMR (400 MHz, CDCl<sub>3</sub>) δ 7.56 (d, *J* = 8.2 Hz, 2H), 7.43 (d, *J* = 8.1 Hz, 2H), 7.29 (dd, *J* = 8.6, 5.4 Hz, 1H), 7.02 (td, *J* = 8.4, 2.5 Hz, 1H), 6.71 (dd, *J* = 8.8, 2.4 Hz, 1H), 5.35 (dd, *J* = 6.6, 3.4 Hz, 1H), 4.80 (t, *J* = 8.5, 1H), 4.69 (dd, *J* = 8.6, 5.9 Hz, 1H), 4.35 (dd, *J* = 8.4, 5.8 Hz, 1H), 3.42 (dd, *J* = 16.6, 6.3 Hz, 1H), 3.22 (dd, *J* = 16.6, 3.4 Hz, 1H); <sup>13</sup>C NMR (100 MHz, CDCl<sub>3</sub>) δ 161.9 (d, *J* = 247.2 Hz), 157.5, 142.7, 136.0 (d, *J* = 6.8 Hz), 131.0 (d, *J* = 7.9 Hz), 130.3 (q, *J* = 32.6 Hz), 128.4 (d, *J* = 3.3 Hz, 1H), 127.5, 125.9 (q, *J* = 3.7 Hz), 124.0 (q, *J* = 271.0 Hz), 115.7 (d, *J* = 21.3 Hz), 111.5 (d, *J* = 22.4 Hz), 68.3, 51.9 (d, *J* = 2.2 Hz), 51.5, 30.8; <sup>19</sup>F NMR (282 MHz, CDCl<sub>3</sub>) δ –62.7, –113.7 – –113.8 (m); IR (Neat Film, NaCl) 2921, 1754, 1620, 1594, 1500, 1402, 1326, 1241, 1162, 1115, 1068, 1018, 839, 759 cm<sup>-1</sup>; HRMS (MM:ESI-APCI+) *m/z* calc'd for C<sub>18</sub>H<sub>14</sub>F<sub>4</sub>NO<sub>2</sub> [M+H]<sup>+</sup>: 352.0955, found 352.0954; SFC Conditions: 40% MeOH, 3.5 mL/min, Chiralpak IC column, λ = 210 nm, t<sub>R</sub> (min): minor = 1.43, major = 1.60.

## Experimental Procedure for Product Transformations:

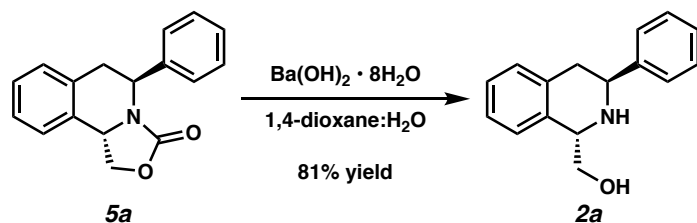

This procedure has been adapted from a previous report.<sup>8</sup> To a 1-dram vial equipped with a stir bar was added a solution of tetrahydroisoquinoline **5a** (4.4 mg, 0.02 mmol) in 1:1 1,4-dioxane:H<sub>2</sub>O (0.4 mL total, 0.05 M). Barium hydroxide octahydrate (24 mg, 4.1 equiv, 0.07 mmol) was then added and the vial was capped with a PTFE-lined septum and sealed with electrical tape. The reaction mixture was heated to 120 °C and stirred for 3 hours until TLC analysis indicated complete consumption of the starting material. The reaction was then diluted with H<sub>2</sub>O, extracted with EtOAc, and the collected organic layers were dried over Na<sub>2</sub>SO<sub>4</sub> and concentrated under vacuum. The crude product was purified by column chromatography (50% EtOAc in hexanes + 1% NEt<sub>3</sub>) to afford **2a** as a white solid (3.2 mg, 81% yield): [ $\alpha$ ]<sub>D</sub><sup>25</sup> -8.3 (*c* 0.15, CHCl<sub>3</sub>); <sup>1</sup>H NMR (400 MHz, CDCl<sub>3</sub>)  $\delta$  7.47 – 7.44 (m, 2H), 7.42 – 7.38 (m, 2H), 7.33 – 7.29 (m, 1H), 7.22 – 7.18 (m, 2H), 7.17 – 7.13 (m, 2H), 4.23 (dd, *J* = 10.6, 4.8 Hz, 1H), 4.15 (dd, *J* = 11.2, 3.9 Hz, 1H), 3.80 (dd, *J* = 10.8, 4.8 Hz, 1H), 3.71 (t, *J* = 10.7 Hz, 1H), 3.07 (dd, *J* = 16.4, 3.9 Hz, 1H), 2.95 (dd, *J* = 16.3, 11.2 Hz, 1H); <sup>13</sup>C NMR (100 MHz, CDCl<sub>3</sub>)  $\delta$  143.5, 135.5, 134.7, 129.5, 128.8, 127.5, 127.0, 126.7, 126.6, 126.4, 63.8, 57.4, 50.7, 36.8; IR (Neat Film, NaCl) 3411, 2357, 2086, 1733, 1716, 1700, 1652, 1558, 1540, 1457, 678 cm<sup>-1</sup>; HRMS (MM:ESI-APCI+) *m/z* calc'd for C<sub>16</sub>H<sub>18</sub>NO [M+H]<sup>+</sup>: 240.1388, found 240.1387.

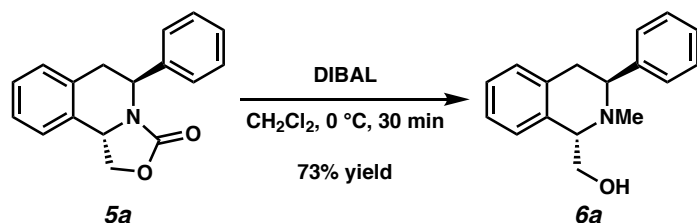

This procedure has been adapted from a previous report.<sup>9</sup> To a 1-dram vial equipped with a stir bar was added a solution of tetrahydroisoquinoline **5a** (5.0 mg, 0.02 mmol) in CH<sub>2</sub>Cl<sub>2</sub> (0.4 mL, 0.05 M). The reaction mixture was cooled to 0 °C, and a solution of DIBAL (1.0 M in THF, 0.38 mL, 0.2 mmol) was added dropwise. After stirring for 1 hour, the reaction mixture showed complete consumption of starting material by TLC, and was quenched with MeOH, H<sub>2</sub>O, and saturated aqueous Rochelle's salt and stirred for an additional hour. The reaction was then diluted with H<sub>2</sub>O, extracted with CH<sub>2</sub>Cl<sub>2</sub> (2 x 5 mL), and the collected organic layers were dried over Na<sub>2</sub>SO<sub>4</sub> and concentrated under vacuum. The crude product was purified by column chromatography (30% EtOAc in hexanes) to afford **6a** as a clear oil (3.5 mg, 73% yield): [ $\alpha$ ]<sub>D</sub><sup>25</sup> +115.8 (*c* 0.50, CHCl<sub>3</sub>); <sup>1</sup>H NMR (400 MHz, CDCl<sub>3</sub>)  $\delta$  7.47 – 7.45 (m, 2H), 7.42 – 7.38 (m, 2H),



7.33 – 7.29 (m, 1H), 7.25 – 7.22 (m, 3H), 7.17 – 7.13 (m, 1H), 4.34 (dd,  $J = 12.2, 4.0$  Hz, 1H), 3.93 (dd,  $J = 10.5, 5.3$  Hz, 1H), 3.81 (dd,  $J = 10.8, 5.3$  Hz, 1H), 3.72 (t,  $J = 10.6$  Hz, 1H), 3.37 (dd,  $J = 16.5, 12.2$  Hz, 1H), 2.92 (dd,  $J = 16.5, 4.0$  Hz, 1H), 2.21 (s, 3H);  $^{13}\text{C}$  NMR (100 MHz,  $\text{CDCl}_3$ )  $\delta$  140.9, 134.5, 133.7, 129.5, 128.5, 127.9, 127.8, 127.4, 126.9, 126.7, 65.8, 63.4, 53.2, 35.7, 25.1; IR (Neat Film, NaCl) 3423, 3058, 3024, 2918, 2854, 2366, 1496, 1450, 1406, 1222, 1130, 1044, 774, 752, 699  $\text{cm}^{-1}$ ; HRMS (MM:ESI-APCI+)  $m/z$  calc'd for  $\text{C}_{17}\text{H}_{20}\text{NO}$   $[\text{M}+\text{H}]^+$ : 254.1545, found 254.1543.

## Additional Optimization Results

Table S1. Additional Optimization Studies<sup>a</sup>

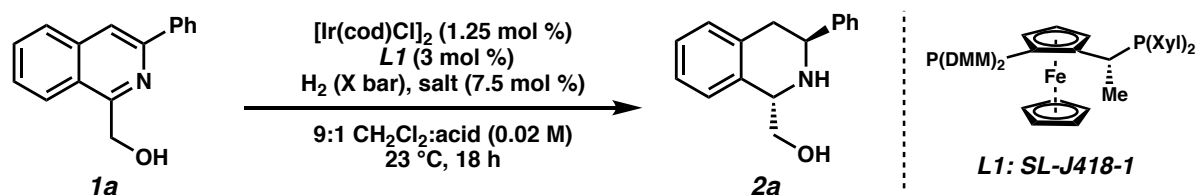

| entry | salt additive       | acid | pressure | % conversion <sup>b</sup> | cis:trans <sup>b</sup> | % ee of trans <sup>c</sup> |
|-------|---------------------|------|----------|---------------------------|------------------------|----------------------------|
| 1     | TBACl               | AcOH | 20 bar   | 75                        | 1:2.3                  | 90                         |
| 2     | TBAI                | AcOH | 20 bar   | >95                       | 1.5:1                  | 97                         |
| 3     | TBAPF <sub>6</sub>  | AcOH | 20 bar   | <10                       | –                      | –                          |
| 4     | TBABF <sub>4</sub>  | AcOH | 20 bar   | <10                       | –                      | –                          |
| 5     | TBABPh <sub>4</sub> | AcOH | 20 bar   | <10                       | –                      | –                          |
| 6     | LiBr                | AcOH | 20 bar   | >95                       | 1:2.3                  | 91                         |
| 7     | NaBr                | AcOH | 20 bar   | 90                        | 1:2.3                  | 89                         |
| 8     | KBr                 | AcOH | 20 bar   | 35                        | 1:2.4                  | 86                         |
| 9     | TBABr               | TFA  | 20 bar   | <10                       | –                      | –                          |
| 10    | TBABr               | MsOH | 20 bar   | <10                       | –                      | –                          |
| 11    | TBABr               | AcOH | 10 bar   | >95                       | 1:2.3                  | 91                         |
| 12    | TBABr               | AcOH | 60 bar   | >95                       | 1:2.6                  | 93                         |

<sup>a</sup>Conditions: 0.04 mmol **1a**, 1.25 mol %  $[\text{Ir}(\text{cod})\text{Cl}]_2$ , 3 mol % ligand, 7.5 mol % salt additive, 20 bar  $\text{H}_2$  in 0.5 mL 9:1  $\text{CH}_2\text{Cl}_2$ :acid. <sup>b</sup>Determined from crude  $^1\text{H}$  NMR using trimethoxybenzene as a standard.

<sup>c</sup>Determined by chiral SFC analysis of Cbz-protected product.

**Table S2. Additional Ligand Screen<sup>a</sup>**

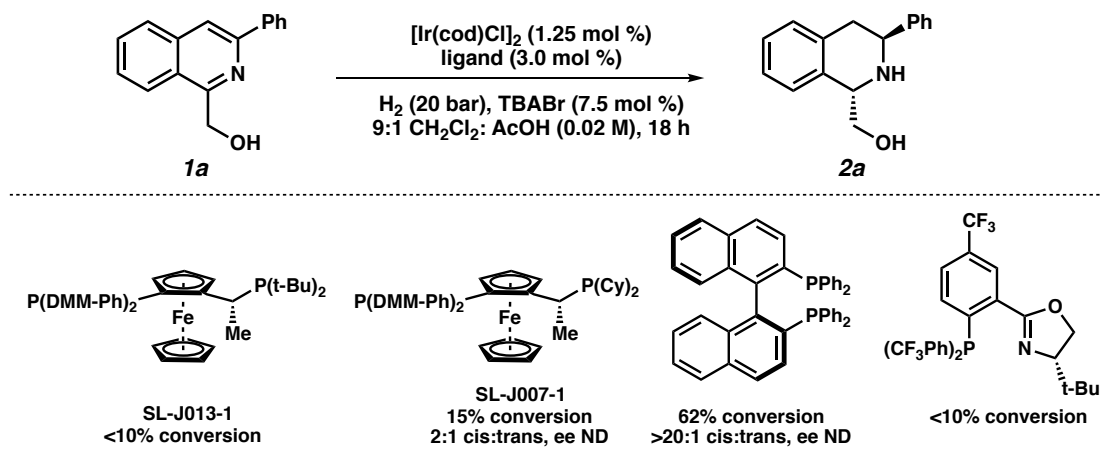

<sup>a</sup>Conditions: 0.04 mmol **1a**, 1.25 mol %  $[\text{Ir}(\text{cod})\text{Cl}]_2$ , 3 mol % ligand, 7.5 mol % TBABr, 20 bar  $\text{H}_2$  in 0.5 mL 9:1  $\text{CH}_2\text{Cl}_2$ :AcOH. Determined from crude  $^1\text{H}$  NMR using trimethoxybenzene as a standard.

### Deuterium Incorporation Experiments

Deuterium experiments were conducted according to general procedure 5 for the hydrogenation of isoquinoline **1a** using deuterium gas instead of hydrogen gas, and/or  $d_4$ -AcOH instead of protio acetic acid.

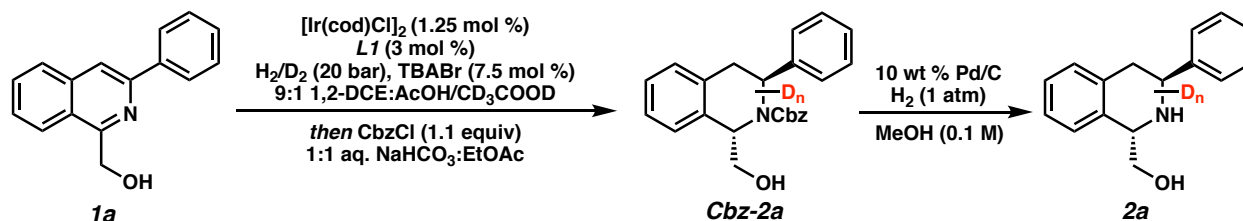

Due to the inseparable nature of the *cis*- and *trans*-diastereomers, the hydrogenated products were subsequently protected with benzyl chloroformate (6.3  $\mu\text{L}$ , 0.044 mmol, 1.1 equiv) in 1:1 saturated aq.  $\text{NaHCO}_3$  and EtOAc (1 mL total). After the reaction showed full conversion of the hydrogenated product, the crude reaction mixture was washed with ethyl acetate and the collected organic layers were dried over  $\text{Na}_2\text{SO}_4$  and concentrated under vacuum. Both the *cis*- and *trans*-isomers were isolated by preparative TLC (40% EtOAc in hexanes) of the Cbz-protected THIQ, then subsequently deprotected using 10 wt% Pd/C catalyst (1 mg) under a  $\text{H}_2$  balloon in MeOH (0.1 M) to afford deuterium-labelled **2a**. The major *trans*-isomer was analyzed by  $^1\text{H}$  and  $^2\text{H}$  NMR spectroscopy.

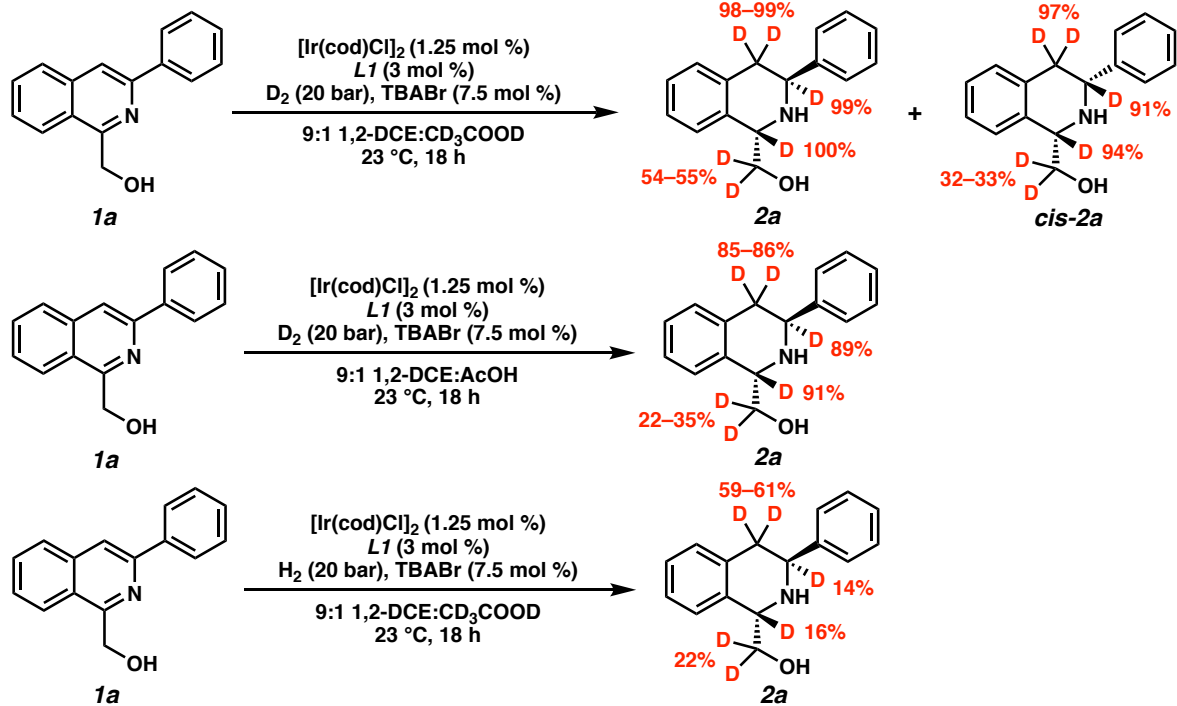

## Proposed Catalytic Cycle

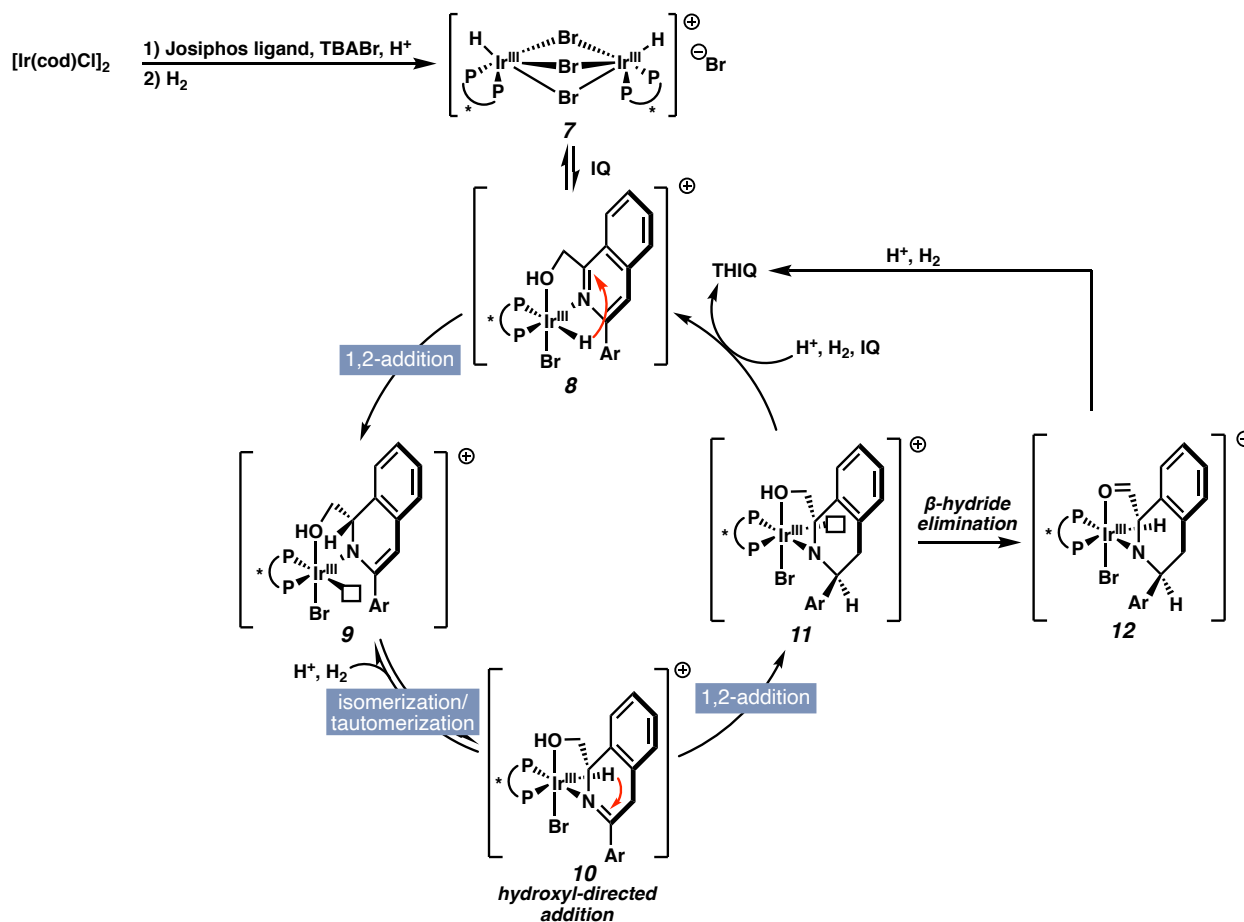

**Figure S1.** Based on preliminary mechanistic studies and literature precedent, a proposed catalytic cycle for the *trans*-selective asymmetric hydrogenation is described. Pre-formation of the chiral catalyst using  $[\text{Ir}(\text{cod})\text{Cl}]_2$ , chiral ligand, and TBABr, followed by oxidative addition with  $\text{H}_2$  delivers the halogen-bridged dinuclear  $\text{Ir}^{\text{III}}$  catalyst complex 7. Without the halide, the iridium bisphosphane catalysts tend to irreversibly form dimeric iridium hydride complexes that are catalytically inactive.<sup>10</sup> Addition of the isoquinoline substrate then undergoes bidentate coordination to the metal to generate the corresponding mononuclear  $\text{Ir}^{\text{III}}$  complex 8, followed by a 1,2-hydride addition to establish the C1-stereocenter (9).<sup>11</sup> Isomerization and tautomerization of the substrate then enables a directed hydrogenation (10) guided by the hydroxymethyl group to deliver the hydride on the opposite face of the molecule. The addition of  $\text{H}_2$  in the presence of acid regenerates the catalyst species and liberates the enantioenriched *trans*-THIQ product. Alternatively, based on our deuterium experiments,  $\beta$ -hydride elimination can also proceed from intermediate 11 to generate aldehyde intermediate 12, which is subsequently reduced to provide the same THIQ product. However, the possibility of  $\beta$ -hydride elimination occurring at other intermediates still cannot be ruled out, and further investigations of the mechanism are currently underway.

**Table S3. Determination of Enantiomeric Excess**

| entry | compound          | SFC analytic conditions                                                                                           | ee (%) |
|-------|-------------------|-------------------------------------------------------------------------------------------------------------------|--------|
| 1     | <br><b>2a-Cbz</b> | Chiralpak AD-H, $\lambda = 210$ nm<br>45% IPA/CO <sub>2</sub> , 3.5 mL/min<br>$t_R$ (min) major 1.69, minor 2.04  | 92     |
| 2     | <br><b>3e-Cbz</b> | Chiralpak AD-H, $\lambda = 210$ nm<br>30% IPA/CO <sub>2</sub> , 2.5 mL/min<br>$t_R$ (min) major 1.95, minor 4.28  | 25     |
| 3     | <br><b>5a</b>     | Chiralpak IC, $\lambda = 210$ nm<br>40% MeOH/CO <sub>2</sub> , 3.5 mL/min<br>$t_R$ (min) minor 2.41, major 2.61   | 91     |
| 4     | <br><b>5b</b>     | Chiralcel OJ-H, $\lambda = 210$ nm<br>10% MeOH/CO <sub>2</sub> , 3.5 mL/min<br>$t_R$ (min) minor 7.52, major 8.66 | 96     |
| 5     | <br><b>5c</b>     | Chiralpak AD-H, $\lambda = 210$ nm<br>20% MeOH/CO <sub>2</sub> , 3.5 mL/min<br>$t_R$ (min) major 5.04, minor 5.44 | 95     |
| 6     | <br><b>5d</b>     | Chiralpak IC, $\lambda = 210$ nm<br>35% MeOH/CO <sub>2</sub> , 3.5 mL/min<br>$t_R$ (min) minor 2.39, major 2.58   | 95     |

| entry | compound                                                                                             | SFC analytic conditions                                                                                                    | ee (%) |
|-------|------------------------------------------------------------------------------------------------------|----------------------------------------------------------------------------------------------------------------------------|--------|
| 7     | 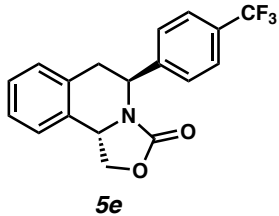 <p><b>5e</b></p>   | Chiralpak IC, $\lambda = 210$ nm<br>25% MeOH/CO <sub>2</sub> , 3.5 mL/min<br>t <sub>R</sub> (min) minor 2.22, major 2.37   | 91     |
| 8     |  <p><b>5f</b></p>   | Chiralpak IC, $\lambda = 210$ nm<br>40% MeOH/CO <sub>2</sub> , 3.5 mL/min<br>t <sub>R</sub> (min) minor 3.97, major 4.48   | 83     |
| 9     |  <p><b>5g</b></p>  | Chiralcel OJ-H, $\lambda = 210$ nm<br>45% MeOH/CO <sub>2</sub> , 3.5 mL/min<br>t <sub>R</sub> (min) minor 5.72, major 6.80 | 75     |
| 10    |  <p><b>5h</b></p> | Chiralpak IC, $\lambda = 210$ nm<br>40% MeOH/CO <sub>2</sub> , 3.5 mL/min<br>t <sub>R</sub> (min) minor 4.21, major 4.61   | 89     |
| 11    |  <p><b>5i</b></p> | Chiralpak IC, $\lambda = 210$ nm<br>40% MeOH/CO <sub>2</sub> , 3.5 mL/min<br>t <sub>R</sub> (min) minor 2.47, major 2.71   | 86     |
| 12    |  <p><b>5j</b></p> | Chiralpak AD-H, $\lambda = 210$ nm<br>40% MeOH/CO <sub>2</sub> , 3.5 mL/min<br>t <sub>R</sub> (min) major 2.13, minor 2.74 | 87     |

| entry | compound                                                                                             | SFC analytic conditions                                                                                                    | ee (%) |
|-------|------------------------------------------------------------------------------------------------------|----------------------------------------------------------------------------------------------------------------------------|--------|
| 13    | 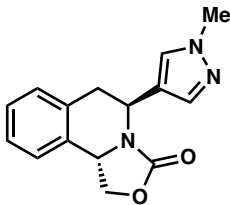 <p><b>5k</b></p>   | Chiralpak AD-H, $\lambda = 210$ nm<br>40% MeOH/CO <sub>2</sub> , 3.5 mL/min<br>t <sub>R</sub> (min) minor 2.24, major 2.67 | 97     |
| 14    |  <p><b>5l</b></p>   | Chiralpak AD-H, $\lambda = 210$ nm<br>40% MeOH/CO <sub>2</sub> , 3.5 mL/min<br>t <sub>R</sub> (min) minor 2.80, minor 3.30 | 95     |
| 15    |  <p><b>5m</b></p>   | Chiralpak IC, $\lambda = 210$ nm<br>40% MeOH/CO <sub>2</sub> , 3.5 mL/min<br>t <sub>R</sub> (min) minor 2.09, major 2.53   | 95     |
| 16    |  <p><b>5n</b></p> | Chiralpak IC, $\lambda = 210$ nm<br>40% MeOH/CO <sub>2</sub> , 3.5 mL/min<br>t <sub>R</sub> (min) minor 1.43, major 1.60   | 92     |

## X-Ray Crystal Structure Data for Hydrogenated Product 5a

The tetrahydroisoquinoline product **5a** (91% ee) was crystallized by slow evaporation from chloroform at 23 °C to provide crystals suitable for X-ray analysis.

Compound V21097 crystallizes in the orthorhombic space group  $P2_12_12_1$  with one molecule in the asymmetric unit.

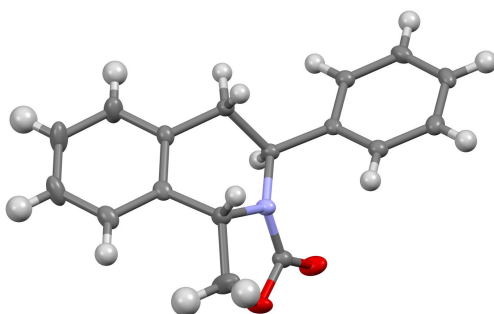

**Table S4. Crystal data and structure refinement for V21097.**

|                                 |                                                                                                 |
|---------------------------------|-------------------------------------------------------------------------------------------------|
| Identification code             | V21097                                                                                          |
| Empirical formula               | C <sub>17</sub> H <sub>15</sub> N O <sub>2</sub>                                                |
| Formula weight                  | 265.30                                                                                          |
| Temperature                     | 100(2) K                                                                                        |
| Wavelength                      | 1.54178 Å                                                                                       |
| Crystal system                  | Orthorhombic                                                                                    |
| Space group                     | $P2_12_12_1$                                                                                    |
| Unit cell dimensions            | a = 6.5620(8) Å      a = 90°.<br>b = 14.2320(17) Å    b = 90°.<br>c = 14.4563(19) Å    g = 90°. |
| Volume                          | 1350.1(3) Å <sup>3</sup>                                                                        |
| Z                               | 4                                                                                               |
| Density (calculated)            | 1.305 Mg/m <sup>3</sup>                                                                         |
| Absorption coefficient          | 0.687 mm <sup>-1</sup>                                                                          |
| F(000)                          | 560                                                                                             |
| Crystal size                    | 0.300 x 0.150 x 0.150 mm <sup>3</sup>                                                           |
| Theta range for data collection | 4.359 to 79.624°.                                                                               |
| Index ranges                    | -8<=h<=8, -17<=k<=18, -18<=l<=18                                                                |
| Reflections collected           | 23786                                                                                           |



|                                   |                                             |
|-----------------------------------|---------------------------------------------|
| Independent reflections           | 2903 [R(int) = 0.0368]                      |
| Completeness to theta = 67.679°   | 100.0 %                                     |
| Absorption correction             | Semi-empirical from equivalents             |
| Max. and min. transmission        | 0.7543 and 0.6141                           |
| Refinement method                 | Full-matrix least-squares on F <sup>2</sup> |
| Data / restraints / parameters    | 2903 / 0 / 181                              |
| Goodness-of-fit on F <sup>2</sup> | 1.106                                       |
| Final R indices [I>2sigma(I)]     | R1 = 0.0314, wR2 = 0.0806                   |
| R indices (all data)              | R1 = 0.0317, wR2 = 0.0807                   |
| Absolute structure parameter      | 0.04(5)                                     |
| Extinction coefficient            | n/a                                         |
| Largest diff. peak and hole       | 0.157 and -0.228 e.Å <sup>-3</sup>          |

**Table S5. Atomic coordinates ( x 10<sup>4</sup>) and equivalent isotropic displacement parameters (Å<sup>2</sup>x 10<sup>3</sup>) for V21097. U(eq) is defined as one third of the trace of the orthogonalized U<sup>ij</sup> tensor.**

|       | x        | y       | z       | U(eq) |
|-------|----------|---------|---------|-------|
| C(1)  | 5632(2)  | 5374(1) | 8245(1) | 20(1) |
| O(1)  | 7103(2)  | 4818(1) | 8618(1) | 26(1) |
| O(2)  | 3839(2)  | 5236(1) | 8370(1) | 30(1) |
| C(2)  | 9070(3)  | 5142(1) | 8341(2) | 39(1) |
| C(3)  | 8729(2)  | 6082(1) | 7842(1) | 20(1) |
| C(4)  | 9357(2)  | 6972(1) | 8337(1) | 18(1) |
| C(5)  | 10846(3) | 7016(1) | 9020(1) | 24(1) |
| C(6)  | 11296(3) | 7867(2) | 9444(1) | 32(1) |
| C(7)  | 10246(3) | 8669(2) | 9192(1) | 35(1) |
| C(8)  | 8766(3)  | 8632(1) | 8500(1) | 28(1) |
| C(9)  | 8329(2)  | 7787(1) | 8060(1) | 19(1) |
| C(10) | 6807(2)  | 7701(1) | 7288(1) | 19(1) |
| C(11) | 5305(2)  | 6893(1) | 7469(1) | 16(1) |
| C(12) | 3921(2)  | 6716(1) | 6645(1) | 16(1) |
| C(13) | 4020(3)  | 5903(1) | 6111(1) | 20(1) |
| C(14) | 2681(3)  | 5771(1) | 5375(1) | 22(1) |
| C(15) | 1261(3)  | 6451(1) | 5150(1) | 23(1) |

|       |         |         |         |       |
|-------|---------|---------|---------|-------|
| C(16) | 1180(3) | 7277(1) | 5665(1) | 22(1) |
| C(17) | 2487(2) | 7401(1) | 6413(1) | 19(1) |
| N(1)  | 6496(2) | 6060(1) | 7731(1) | 19(1) |

---

**Table S6. Bond lengths [Å] and angles [°] for V21097.**

---

|              |            |
|--------------|------------|
| C(1)-O(2)    | 1.206(2)   |
| C(1)-N(1)    | 1.352(2)   |
| C(1)-O(1)    | 1.360(2)   |
| O(1)-C(2)    | 1.428(2)   |
| C(2)-C(3)    | 1.536(2)   |
| C(2)-H(2A)   | 0.9900     |
| C(2)-H(2B)   | 0.9900     |
| C(3)-N(1)    | 1.474(2)   |
| C(3)-C(4)    | 1.512(2)   |
| C(3)-H(3)    | 1.0000     |
| C(4)-C(5)    | 1.391(2)   |
| C(4)-C(9)    | 1.401(2)   |
| C(5)-C(6)    | 1.389(3)   |
| C(5)-H(5)    | 0.9500     |
| C(6)-C(7)    | 1.383(3)   |
| C(6)-H(6)    | 0.9500     |
| C(7)-C(8)    | 1.395(3)   |
| C(7)-H(7)    | 0.9500     |
| C(8)-C(9)    | 1.390(2)   |
| C(8)-H(8)    | 0.9500     |
| C(9)-C(10)   | 1.503(2)   |
| C(10)-C(11)  | 1.537(2)   |
| C(10)-H(10A) | 0.9900     |
| C(10)-H(10B) | 0.9900     |
| C(11)-N(1)   | 1.4693(19) |
| C(11)-C(12)  | 1.518(2)   |
| C(11)-H(11)  | 1.0000     |
| C(12)-C(13)  | 1.392(2)   |
| C(12)-C(17)  | 1.395(2)   |
| C(13)-C(14)  | 1.393(2)   |

|             |          |
|-------------|----------|
| C(13)-H(13) | 0.9500   |
| C(14)-C(15) | 1.382(3) |
| C(14)-H(14) | 0.9500   |
| C(15)-C(16) | 1.391(2) |
| C(15)-H(15) | 0.9500   |
| C(16)-C(17) | 1.391(2) |
| C(16)-H(16) | 0.9500   |
| C(17)-H(17) | 0.9500   |

|                  |            |
|------------------|------------|
| O(2)-C(1)-N(1)   | 127.52(16) |
| O(2)-C(1)-O(1)   | 122.54(15) |
| N(1)-C(1)-O(1)   | 109.93(14) |
| C(1)-O(1)-C(2)   | 110.03(13) |
| O(1)-C(2)-C(3)   | 106.31(14) |
| O(1)-C(2)-H(2A)  | 110.5      |
| C(3)-C(2)-H(2A)  | 110.5      |
| O(1)-C(2)-H(2B)  | 110.5      |
| C(3)-C(2)-H(2B)  | 110.5      |
| H(2A)-C(2)-H(2B) | 108.7      |
| N(1)-C(3)-C(4)   | 109.86(13) |
| N(1)-C(3)-C(2)   | 100.27(13) |
| C(4)-C(3)-C(2)   | 117.83(15) |
| N(1)-C(3)-H(3)   | 109.5      |
| C(4)-C(3)-H(3)   | 109.5      |
| C(2)-C(3)-H(3)   | 109.5      |
| C(5)-C(4)-C(9)   | 120.26(15) |
| C(5)-C(4)-C(3)   | 124.42(15) |
| C(9)-C(4)-C(3)   | 115.32(14) |
| C(6)-C(5)-C(4)   | 120.11(17) |
| C(6)-C(5)-H(5)   | 119.9      |
| C(4)-C(5)-H(5)   | 119.9      |
| C(7)-C(6)-C(5)   | 119.90(17) |
| C(7)-C(6)-H(6)   | 120.1      |
| C(5)-C(6)-H(6)   | 120.1      |
| C(6)-C(7)-C(8)   | 120.27(17) |
| C(6)-C(7)-H(7)   | 119.9      |

|                     |            |
|---------------------|------------|
| C(8)-C(7)-H(7)      | 119.9      |
| C(9)-C(8)-C(7)      | 120.30(17) |
| C(9)-C(8)-H(8)      | 119.9      |
| C(7)-C(8)-H(8)      | 119.9      |
| C(8)-C(9)-C(4)      | 119.13(15) |
| C(8)-C(9)-C(10)     | 123.21(15) |
| C(4)-C(9)-C(10)     | 117.66(14) |
| C(9)-C(10)-C(11)    | 111.16(13) |
| C(9)-C(10)-H(10A)   | 109.4      |
| C(11)-C(10)-H(10A)  | 109.4      |
| C(9)-C(10)-H(10B)   | 109.4      |
| C(11)-C(10)-H(10B)  | 109.4      |
| H(10A)-C(10)-H(10B) | 108.0      |
| N(1)-C(11)-C(12)    | 112.78(13) |
| N(1)-C(11)-C(10)    | 107.82(12) |
| C(12)-C(11)-C(10)   | 111.92(12) |
| N(1)-C(11)-H(11)    | 108.0      |
| C(12)-C(11)-H(11)   | 108.0      |
| C(10)-C(11)-H(11)   | 108.0      |
| C(13)-C(12)-C(17)   | 118.59(15) |
| C(13)-C(12)-C(11)   | 122.95(14) |
| C(17)-C(12)-C(11)   | 118.46(14) |
| C(12)-C(13)-C(14)   | 120.40(15) |
| C(12)-C(13)-H(13)   | 119.8      |
| C(14)-C(13)-H(13)   | 119.8      |
| C(15)-C(14)-C(13)   | 120.71(15) |
| C(15)-C(14)-H(14)   | 119.6      |
| C(13)-C(14)-H(14)   | 119.6      |
| C(14)-C(15)-C(16)   | 119.42(15) |
| C(14)-C(15)-H(15)   | 120.3      |
| C(16)-C(15)-H(15)   | 120.3      |
| C(15)-C(16)-C(17)   | 119.92(15) |
| C(15)-C(16)-H(16)   | 120.0      |
| C(17)-C(16)-H(16)   | 120.0      |
| C(16)-C(17)-C(12)   | 120.94(15) |
| C(16)-C(17)-H(17)   | 119.5      |

|                   |            |
|-------------------|------------|
| C(12)-C(17)-H(17) | 119.5      |
| C(1)-N(1)-C(11)   | 120.07(13) |
| C(1)-N(1)-C(3)    | 111.82(13) |
| C(11)-N(1)-C(3)   | 122.70(12) |

---

Symmetry transformations used to generate equivalent atoms:

**Table S7. Anisotropic displacement parameters ( $\text{\AA}^2 \times 10^3$ ) for V21097. The anisotropic displacement factor exponent takes the form:  $-2p^2 [ h^2 a^* U^{11} + \dots + 2 h k a^* b^* U^{12} ]$**

|       | U <sup>11</sup> | U <sup>22</sup> | U <sup>33</sup> | U <sup>23</sup> | U <sup>13</sup> | U <sup>12</sup> |
|-------|-----------------|-----------------|-----------------|-----------------|-----------------|-----------------|
| C(1)  | 20(1)           | 19(1)           | 20(1)           | 2(1)            | 2(1)            | 2(1)            |
| O(1)  | 22(1)           | 23(1)           | 34(1)           | 12(1)           | 1(1)            | 5(1)            |
| O(2)  | 20(1)           | 26(1)           | 43(1)           | 11(1)           | 7(1)            | 0(1)            |
| C(2)  | 20(1)           | 28(1)           | 68(1)           | 18(1)           | -9(1)           | -2(1)           |
| C(3)  | 14(1)           | 21(1)           | 25(1)           | 2(1)            | 1(1)            | 1(1)            |
| C(4)  | 14(1)           | 25(1)           | 16(1)           | 1(1)            | 5(1)            | 0(1)            |
| C(5)  | 16(1)           | 36(1)           | 20(1)           | 0(1)            | 2(1)            | 4(1)            |
| C(6)  | 20(1)           | 49(1)           | 26(1)           | -11(1)          | -6(1)           | 6(1)            |
| C(7)  | 27(1)           | 39(1)           | 39(1)           | -21(1)          | -7(1)           | 3(1)            |
| C(8)  | 23(1)           | 28(1)           | 35(1)           | -10(1)          | -6(1)           | 4(1)            |
| C(9)  | 16(1)           | 24(1)           | 18(1)           | -3(1)           | 1(1)            | 0(1)            |
| C(10) | 19(1)           | 17(1)           | 19(1)           | 2(1)            | -1(1)           | -1(1)           |
| C(11) | 16(1)           | 17(1)           | 16(1)           | 2(1)            | 1(1)            | 1(1)            |
| C(12) | 13(1)           | 19(1)           | 15(1)           | 3(1)            | 2(1)            | -2(1)           |
| C(13) | 20(1)           | 20(1)           | 18(1)           | 2(1)            | 2(1)            | 1(1)            |
| C(14) | 25(1)           | 24(1)           | 18(1)           | 0(1)            | 3(1)            | -6(1)           |
| C(15) | 21(1)           | 32(1)           | 16(1)           | 5(1)            | -2(1)           | -8(1)           |
| C(16) | 16(1)           | 27(1)           | 22(1)           | 8(1)            | 0(1)            | 1(1)            |
| C(17) | 17(1)           | 20(1)           | 20(1)           | 2(1)            | 2(1)            | 0(1)            |
| N(1)  | 14(1)           | 20(1)           | 22(1)           | 6(1)            | 0(1)            | 0(1)            |

**Table S8. Hydrogen coordinates ( $\times 10^4$ ) and isotropic displacement parameters ( $\text{\AA}^2 \times 10^3$ ) for V21097.**

|        | x     | y    | z    | U(eq) |
|--------|-------|------|------|-------|
| H(2A)  | 9723  | 4683 | 7921 | 47    |
| H(2B)  | 9959  | 5231 | 8888 | 47    |
| H(3)   | 9391  | 6060 | 7219 | 24    |
| H(5)   | 11557 | 6463 | 9197 | 29    |
| H(6)   | 12322 | 7897 | 9906 | 38    |
| H(7)   | 10535 | 9249 | 9491 | 42    |
| H(8)   | 8054  | 9187 | 8328 | 34    |
| H(10A) | 7534  | 7586 | 6698 | 22    |
| H(10B) | 6043  | 8297 | 7227 | 22    |
| H(11)  | 4430  | 7072 | 8007 | 20    |
| H(13)  | 5007  | 5436 | 6250 | 24    |
| H(14)  | 2744  | 5208 | 5024 | 27    |
| H(15)  | 348   | 6356 | 4649 | 28    |
| H(16)  | 234   | 7755 | 5505 | 26    |
| H(17)  | 2402  | 7959 | 6770 | 22    |

**Table S9. Torsion angles [ $^\circ$ ] for V21097.**

|                     |             |
|---------------------|-------------|
| O(2)-C(1)-O(1)-C(2) | 179.11(18)  |
| N(1)-C(1)-O(1)-C(2) | -0.1(2)     |
| C(1)-O(1)-C(2)-C(3) | 8.0(2)      |
| O(1)-C(2)-C(3)-N(1) | -11.7(2)    |
| O(1)-C(2)-C(3)-C(4) | 107.34(18)  |
| N(1)-C(3)-C(4)-C(5) | 138.89(15)  |
| C(2)-C(3)-C(4)-C(5) | 25.0(2)     |
| N(1)-C(3)-C(4)-C(9) | -41.39(18)  |
| C(2)-C(3)-C(4)-C(9) | -155.28(15) |
| C(9)-C(4)-C(5)-C(6) | 1.2(2)      |
| C(3)-C(4)-C(5)-C(6) | -179.11(16) |
| C(4)-C(5)-C(6)-C(7) | 0.6(3)      |
| C(5)-C(6)-C(7)-C(8) | -1.3(3)     |

|                         |             |
|-------------------------|-------------|
| C(6)-C(7)-C(8)-C(9)     | 0.2(3)      |
| C(7)-C(8)-C(9)-C(4)     | 1.6(3)      |
| C(7)-C(8)-C(9)-C(10)    | -177.85(17) |
| C(5)-C(4)-C(9)-C(8)     | -2.3(2)     |
| C(3)-C(4)-C(9)-C(8)     | 178.00(15)  |
| C(5)-C(4)-C(9)-C(10)    | 177.19(14)  |
| C(3)-C(4)-C(9)-C(10)    | -2.5(2)     |
| C(8)-C(9)-C(10)-C(11)   | -130.25(17) |
| C(4)-C(9)-C(10)-C(11)   | 50.33(18)   |
| C(9)-C(10)-C(11)-N(1)   | -48.40(16)  |
| C(9)-C(10)-C(11)-C(12)  | -172.99(12) |
| N(1)-C(11)-C(12)-C(13)  | -9.5(2)     |
| C(10)-C(11)-C(12)-C(13) | 112.26(16)  |
| N(1)-C(11)-C(12)-C(17)  | 170.44(13)  |
| C(10)-C(11)-C(12)-C(17) | -67.77(18)  |
| C(17)-C(12)-C(13)-C(14) | -1.4(2)     |
| C(11)-C(12)-C(13)-C(14) | 178.59(14)  |
| C(12)-C(13)-C(14)-C(15) | 1.3(2)      |
| C(13)-C(14)-C(15)-C(16) | 0.3(2)      |
| C(14)-C(15)-C(16)-C(17) | -1.7(2)     |
| C(15)-C(16)-C(17)-C(12) | 1.5(2)      |
| C(13)-C(12)-C(17)-C(16) | 0.0(2)      |
| C(11)-C(12)-C(17)-C(16) | -179.99(14) |
| O(2)-C(1)-N(1)-C(11)    | 17.7(3)     |
| O(1)-C(1)-N(1)-C(11)    | -163.14(14) |
| O(2)-C(1)-N(1)-C(3)     | 172.42(17)  |
| O(1)-C(1)-N(1)-C(3)     | -8.43(19)   |
| C(12)-C(11)-N(1)-C(1)   | -80.48(17)  |
| C(10)-C(11)-N(1)-C(1)   | 155.43(14)  |
| C(12)-C(11)-N(1)-C(3)   | 127.63(15)  |
| C(10)-C(11)-N(1)-C(3)   | 3.6(2)      |
| C(4)-C(3)-N(1)-C(1)     | -112.36(15) |
| C(2)-C(3)-N(1)-C(1)     | 12.38(19)   |
| C(4)-C(3)-N(1)-C(11)    | 41.6(2)     |
| C(2)-C(3)-N(1)-C(11)    | 166.32(16)  |

Symmetry transformations used to generate equivalent atoms:

### **Determination of Relative and Absolute Configuration of 2a by Vibrational Circular Dichroism (VCD):**

**Experimental Protocol.** A solution of the isolated *trans* isomer of **2a** (11 mg) was prepared in CDCl<sub>3</sub> (225  $\mu$ L; 49 mg/mL) and loaded into a front-loading SL-4 cell (International Crystal Laboratories) possessing BaF<sub>2</sub> windows and 100  $\mu$ m path length. Infrared (IR) and VCD spectra were acquired on a BioTools ChiralIR-2X VCD spectrometer as a set of 30 one-hour blocks (30 blocks, 3120 scans per block) at 4 cm<sup>-1</sup> resolution in dual PEM mode. A 15-minute acquisition of neat (-)- $\alpha$ -pinene control (separate 75  $\mu$ m BaF<sub>2</sub> cell) yielded a VCD spectrum in agreement with literature spectra and identical to those previously acquired on the same instrument. IR and VCD spectra were background corrected using a 30-minute block IR acquisition of the empty instrument chamber under gentle N<sub>2</sub> purge, and were solvent corrected using a 6-hour (6 blocks, 3120 scans per block) IR/VCD acquisition of CDCl<sub>3</sub> in the same 100  $\mu$ m BaF<sub>2</sub> cell as used for **2a**. The reported spectra represent the result of block averaging. The baseline of the resultant VCD spectrum (top left panel below) was vertically offset by a constant such that the y-value was zero at a frequency of 1000 cm<sup>-1</sup> for ease of viewing and assignment.

**Computational Protocol.** The arbitrarily chosen (*R,R*) enantiomer of **2a** (ultimately corresponding to *ent-2a*) was subjected to an initial exhaustive stochastic molecular mechanics-based conformational search (MMFF94 force field, 0.06 Å geometric RMSD cutoff, and 30 kcal/mol energy window) as implemented in MOE 2019.0102 (Chemical Computing Group, Montreal, CA). All conformers retained the (*R,R*) configuration and were subjected to geometry optimization, harmonic frequency calculation, and VCD rotational strength evaluation using density functional theory utilizing the B3PW91 functional, cc-pVTZ basis, and implicit IEFPCM chloroform solvation model. All calculations were performed with the *Gaussian 16* program system (Rev. C.01; Frisch *et al.*, Gaussian, Inc., Wallingford, CT). Resultant IEFPCM-B3PW91/cc-pVTZ harmonic frequencies were scaled by 0.98. All structurally unique conformers possessing all positive Hessian eigenvalues were Boltzmann weighted by relative free energy at 298.15 K. The predicted IR and VCD frequencies and intensities of the retained conformers were convolved using Lorentzian line shapes ( $\gamma = 4$  cm<sup>-1</sup>) and summed using the



respective Boltzmann weights to yield the final predicted IR and VCD spectra. The predicted VCD spectrum of the (*S,S*) enantiomer (ultimately agreeing with the experimentally measured spectrum of isolated **2a**) was generated by inversion of sign. From alignment of the experimentally measured and theoretical IR spectra, in particular regions A-E corresponding to unambiguous regions of the experimental VCD spectrum (see below) the absolute configuration of the isolated and measured **2a** could be confidently assigned as (*S,S*).

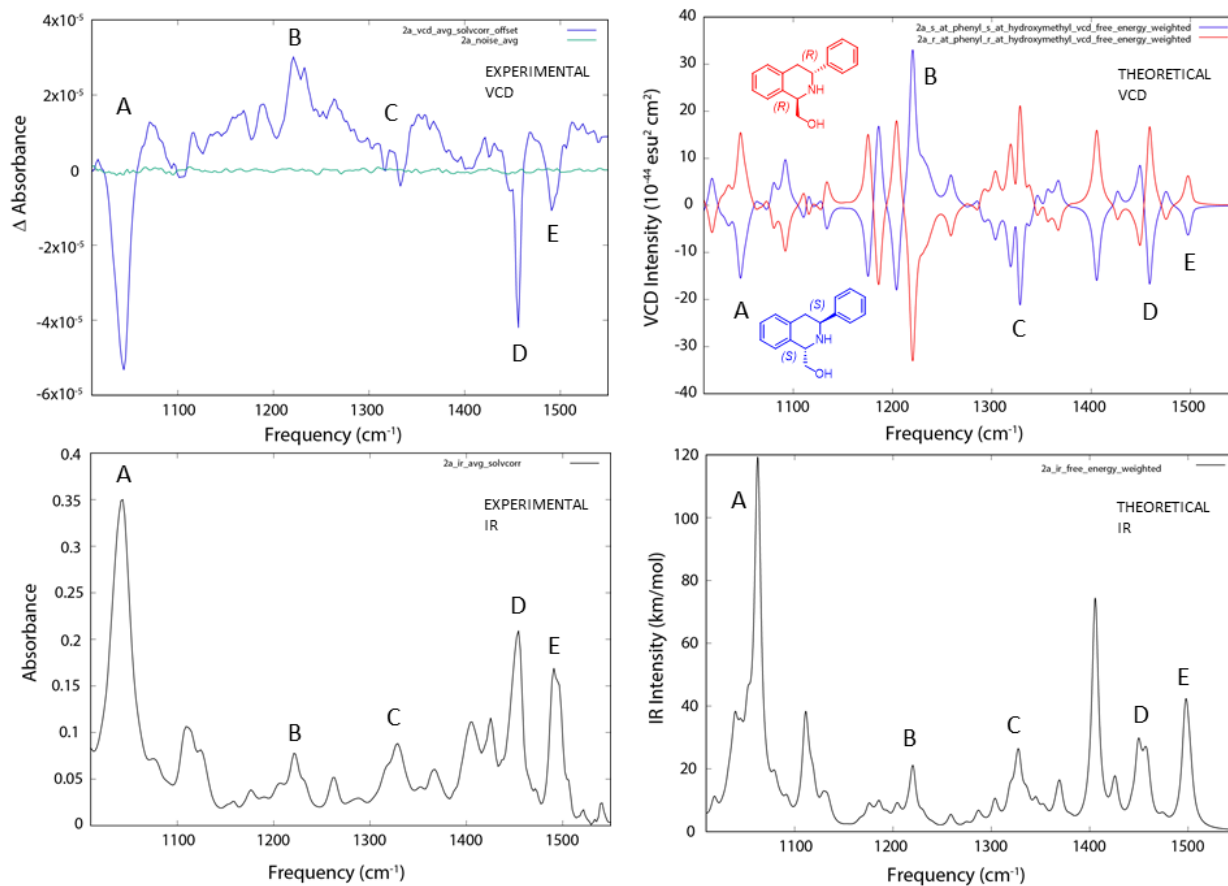

Experimental (left) and theoretical (right) IR and VCD spectra of **2a**.

---

**References:**

- (1) Pangborn, A. M.; Giardello, M. A.; Grubbs, R. H.; Rosen, R. K.; Timmers, F. J. *Organometallics*. **1996**, *15*, 1518–1520.
- (2) Sheldrick, G. M. *Acta Cryst.* **1990**, A46, 467-473.
- (3) Sheldrick, G. M. *Acta Cryst.* **2015**, C71, 3-8.
- (4) Müller, P. *Crystallography Reviews* **2009**, *15*, 57-83.
- (5) Kim, A. N.; Ngamnithiporn, A.; Welin, E. R.; Daiger, M. T.; Grünanger, C. U.; Bartberger, M. D.; Virgil, S. C.; Stoltz, B. M. *ACS Catal.* **2020**, *10*, 3241–3248.
- (6) Legault, C. Y.; Charette, A. B. *J. Am. Chem. Soc.* **2005**, *127*, 8966–8967.
- (7) Xu, Z.; Xu, X.; O’Laoi, R.; Ma, H.; Zheng, J.; Chen, S.; Luo, L.; Hu, Z.; He, S.; Li, J.; Zhang, H.; Zhang, X. *Bioorg. Med. Chem.* **2016**, *24*, 5861–5872.
- (8) Liu, C.-Y.; Angamuthu, V.; Chen, W.-C.; Hou, D.-R. *Org. Lett.* **2020**, *22*, 2246–2250.
- (9) Butora, G.; Hudlicky, T.; Fearnley, S. P.; Gum, A. G.; Stabile, M. R.; Abboud, K. *Tetrahedron Lett.* **1996**, *37*, 8155–8158.
- (10) Kita, Y.; Yamaji, K.; Higashida, K.; Sathaiyah, K.; Iimuro, A.; Mashima, K. *Chem. Eur. J.* **2015**, *21*, 1915–1927.
- (11) Dorta, R.; Broggini, D.; Stoop, R.; Rüegger, H.; Spindler, F.; Togni, A. *Chem. Eur. J.* **2004**, *10*, 267–278.



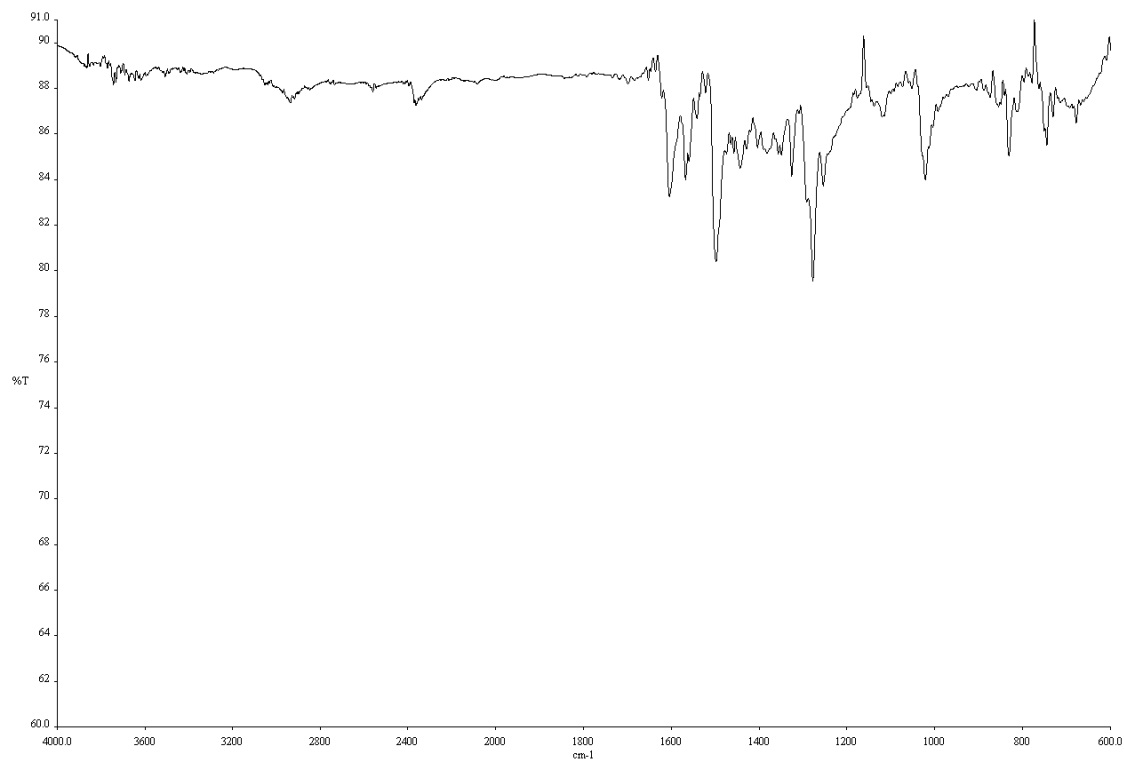

Infrared spectrum (Thin Film, NaCl) of compound **S4I**.

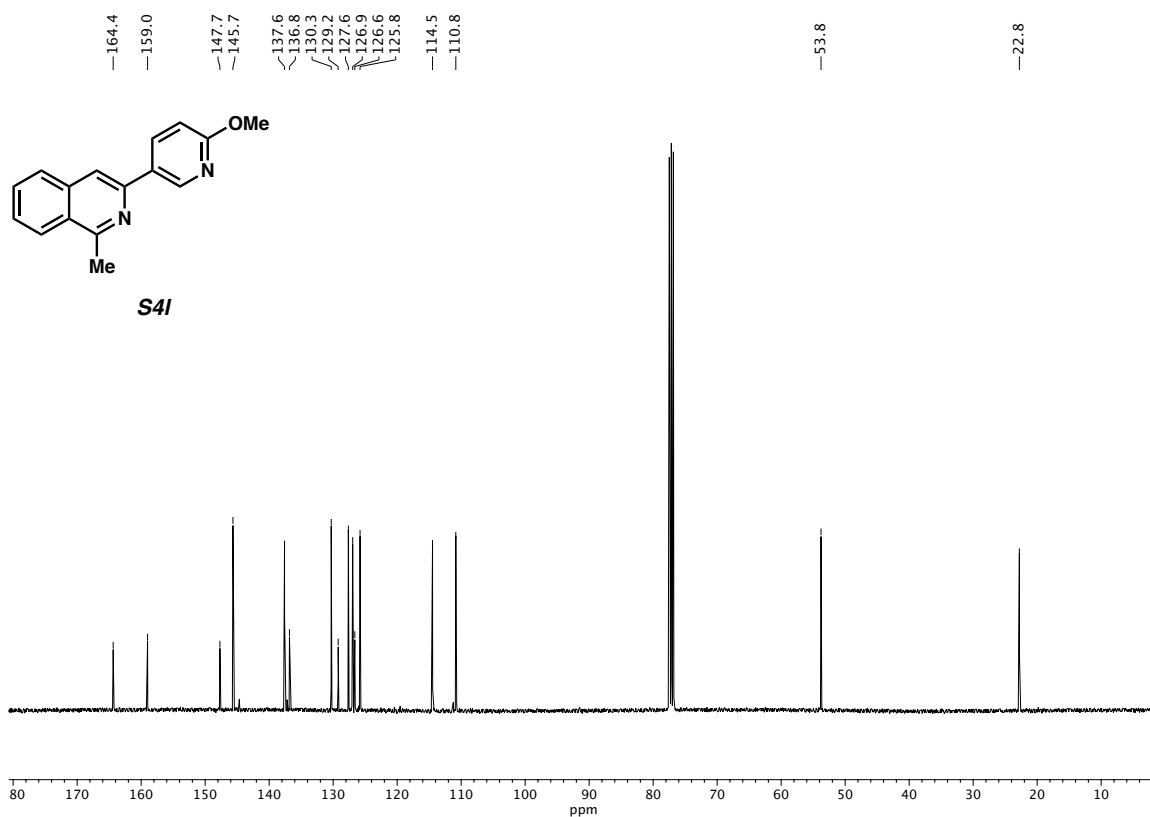

<sup>13</sup>C NMR (100 MHz, CDCl<sub>3</sub>) of compound **S4I**.

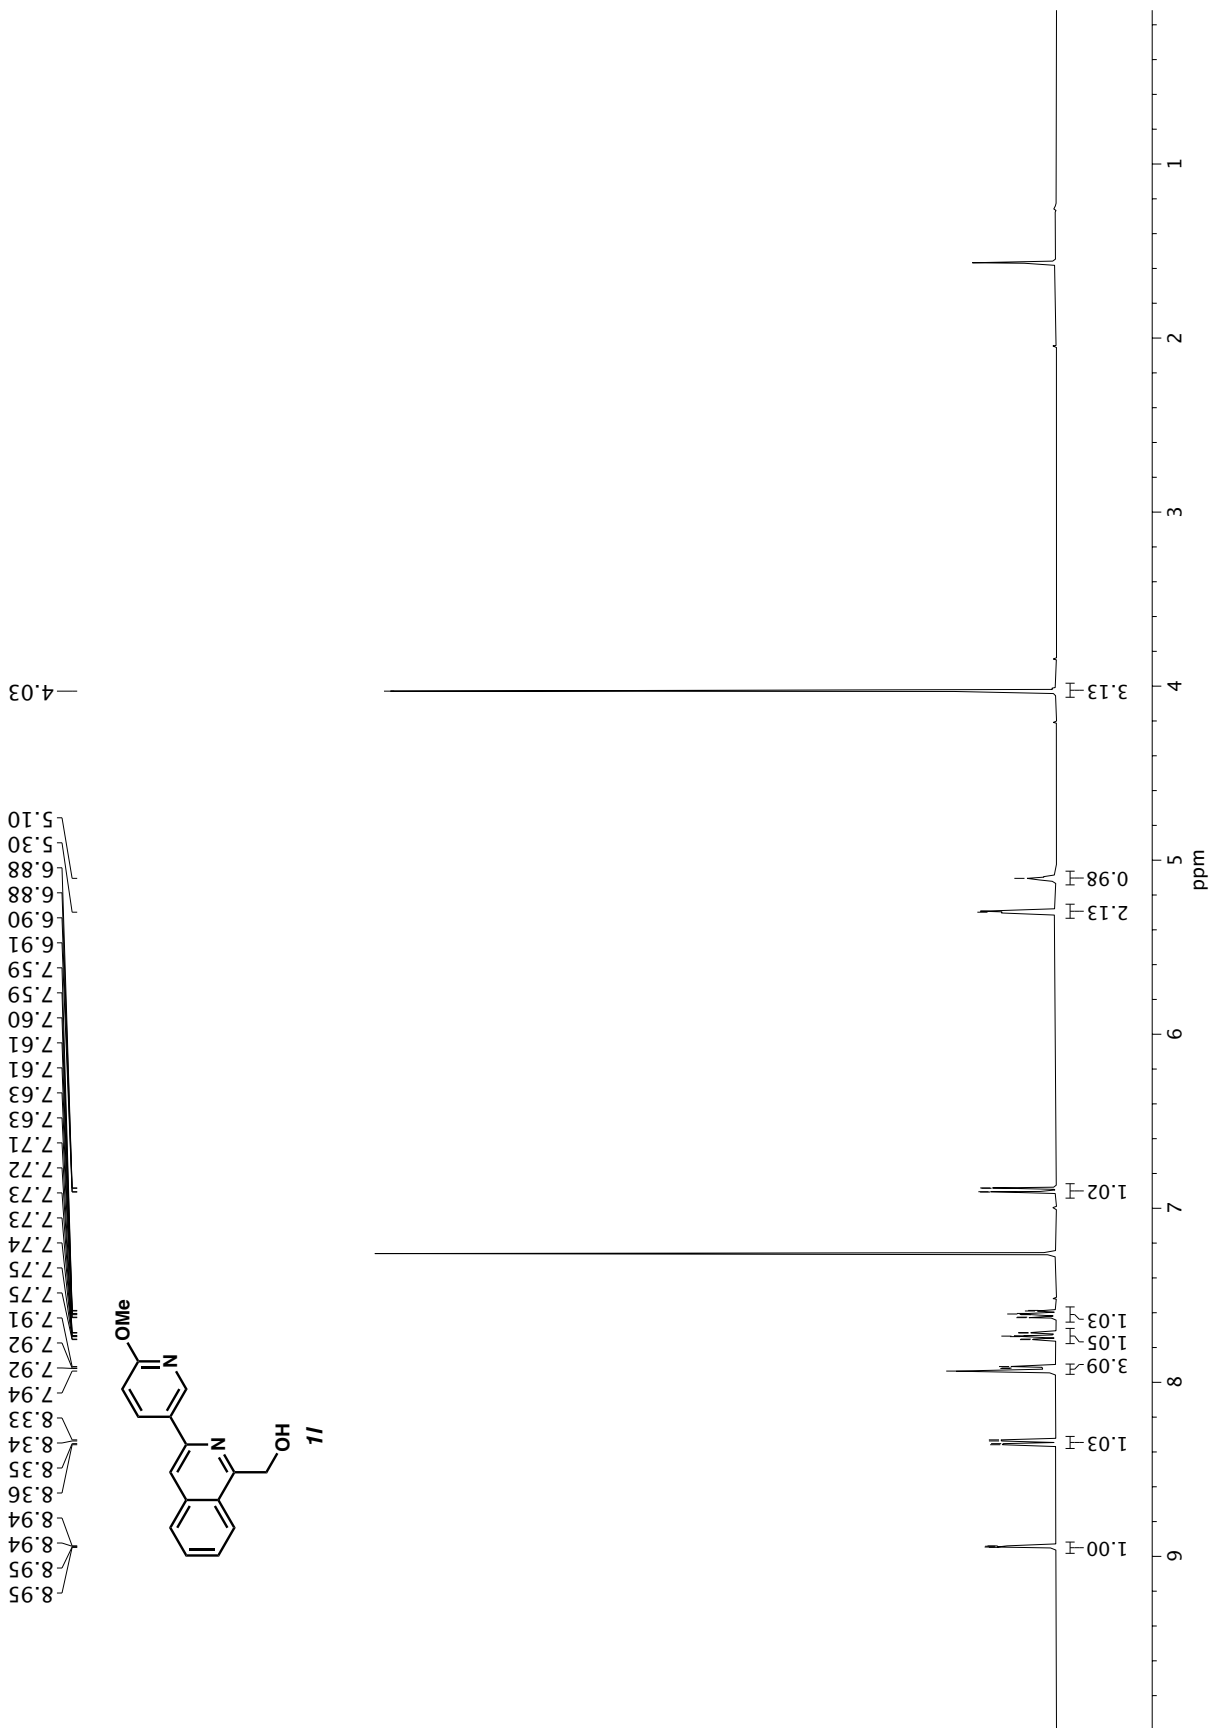

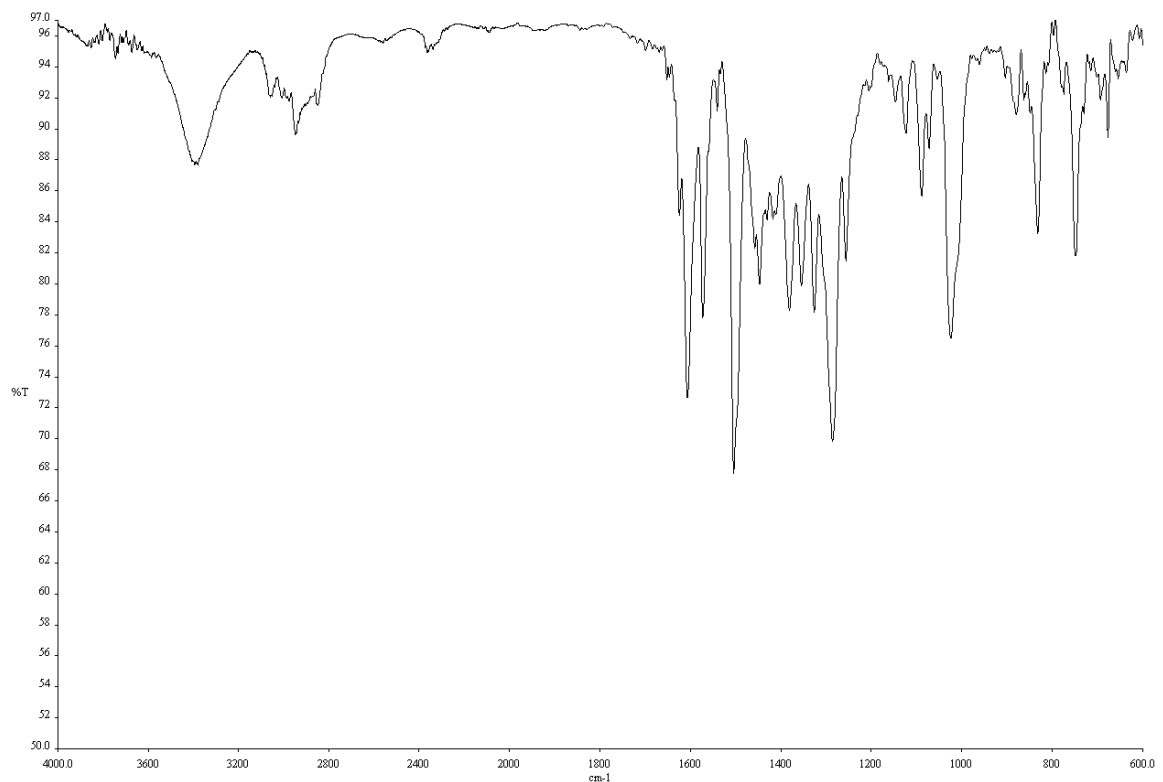

Infrared spectrum (Thin Film, NaCl) of compound **11**.

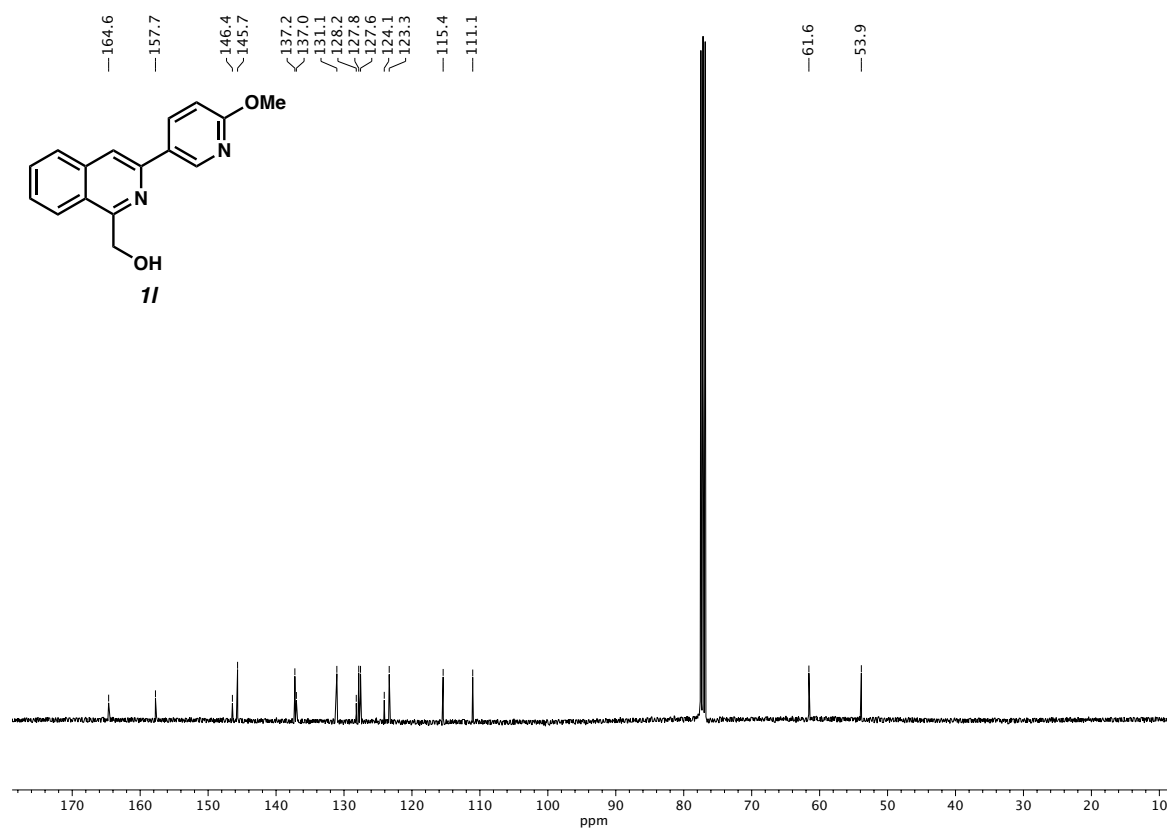

$^{13}\text{C}$  NMR (100 MHz,  $\text{CDCl}_3$ ) of compound **11**.

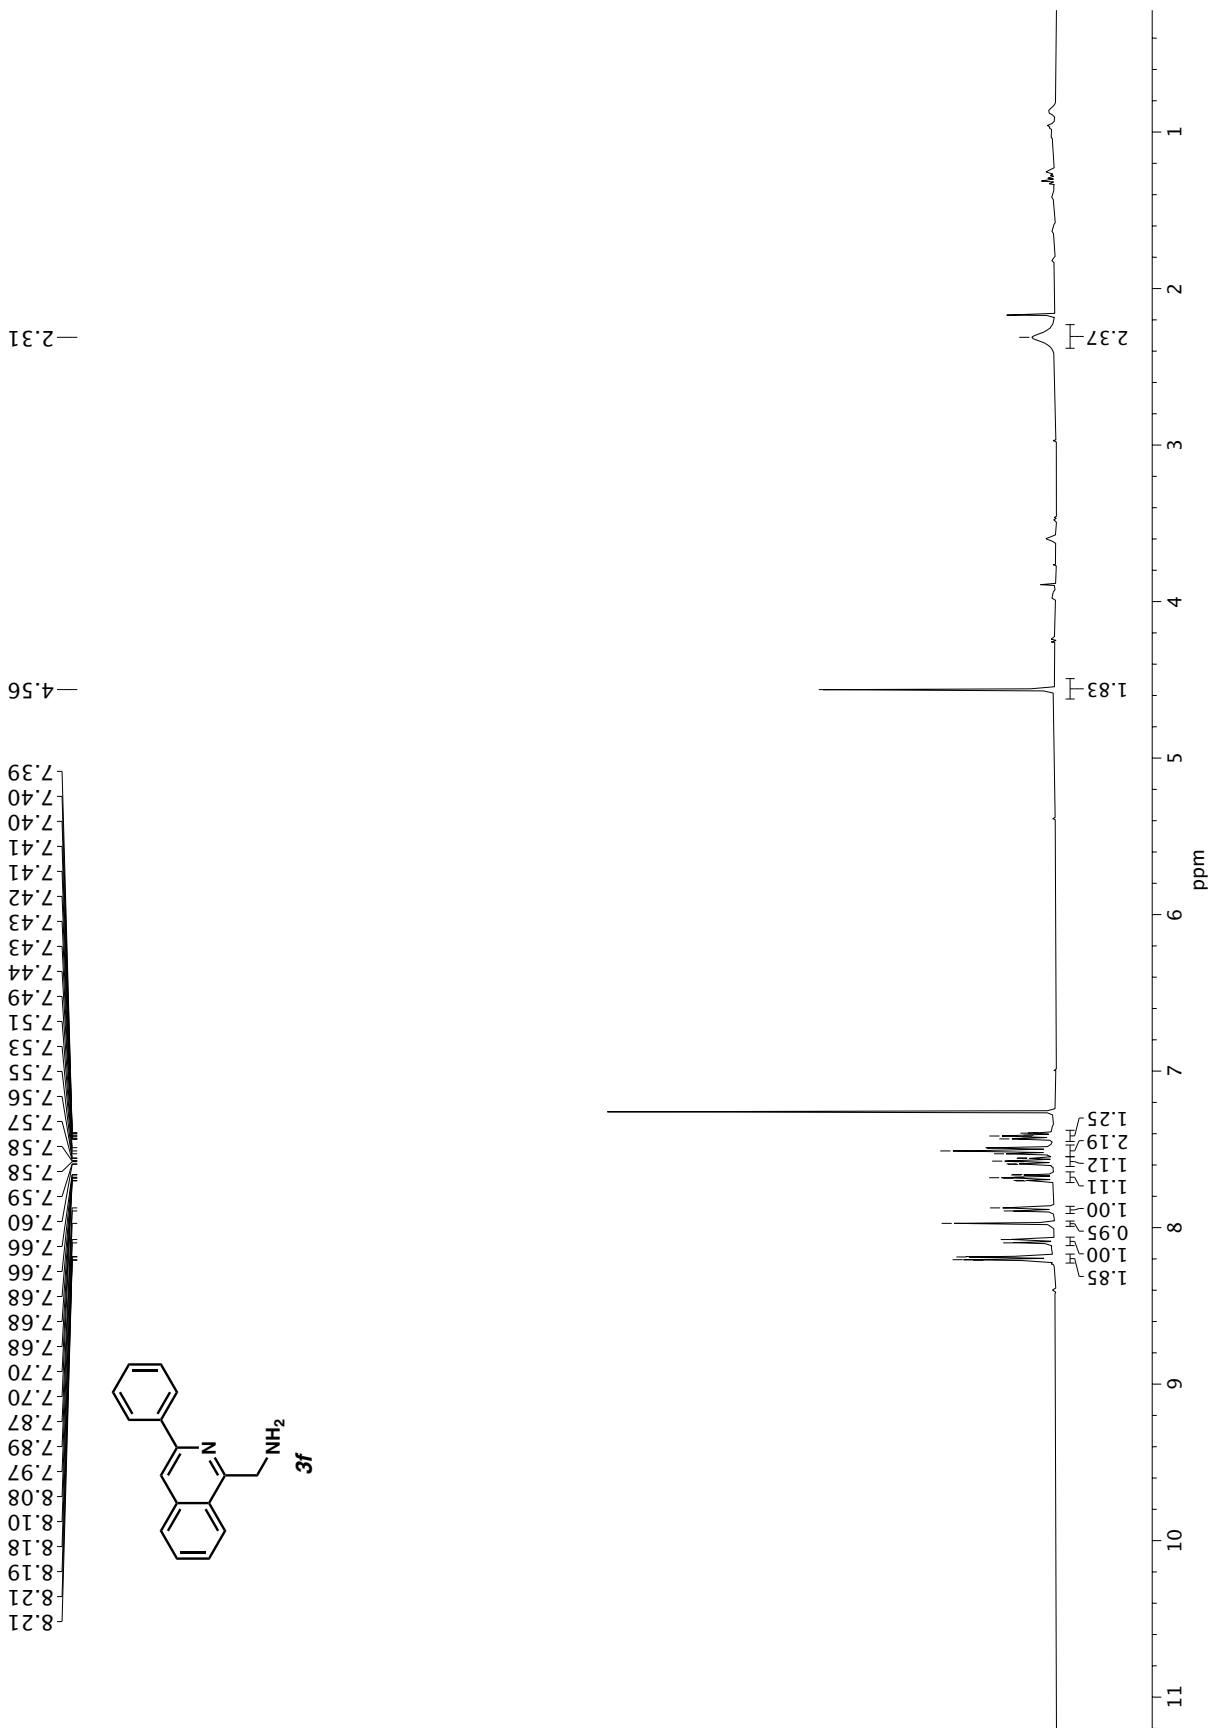

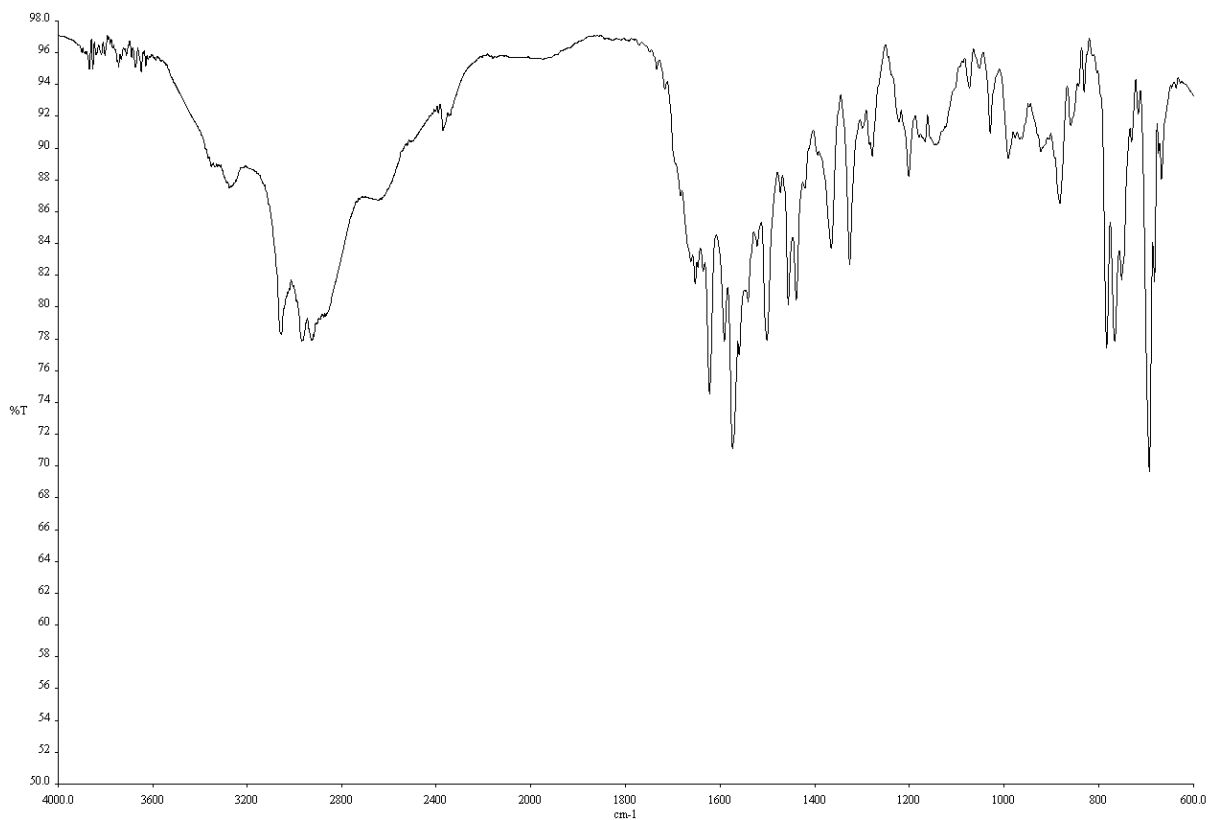

Infrared spectrum (Thin Film, NaCl) of compound **3f**.

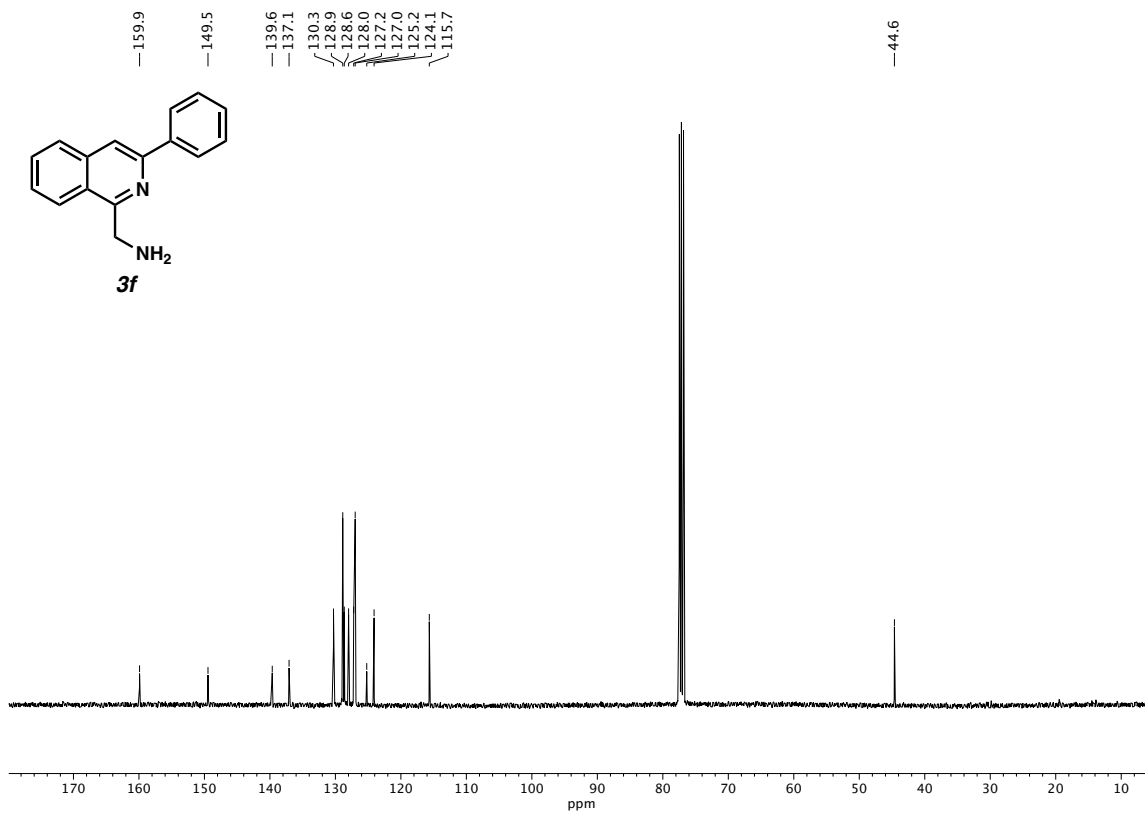



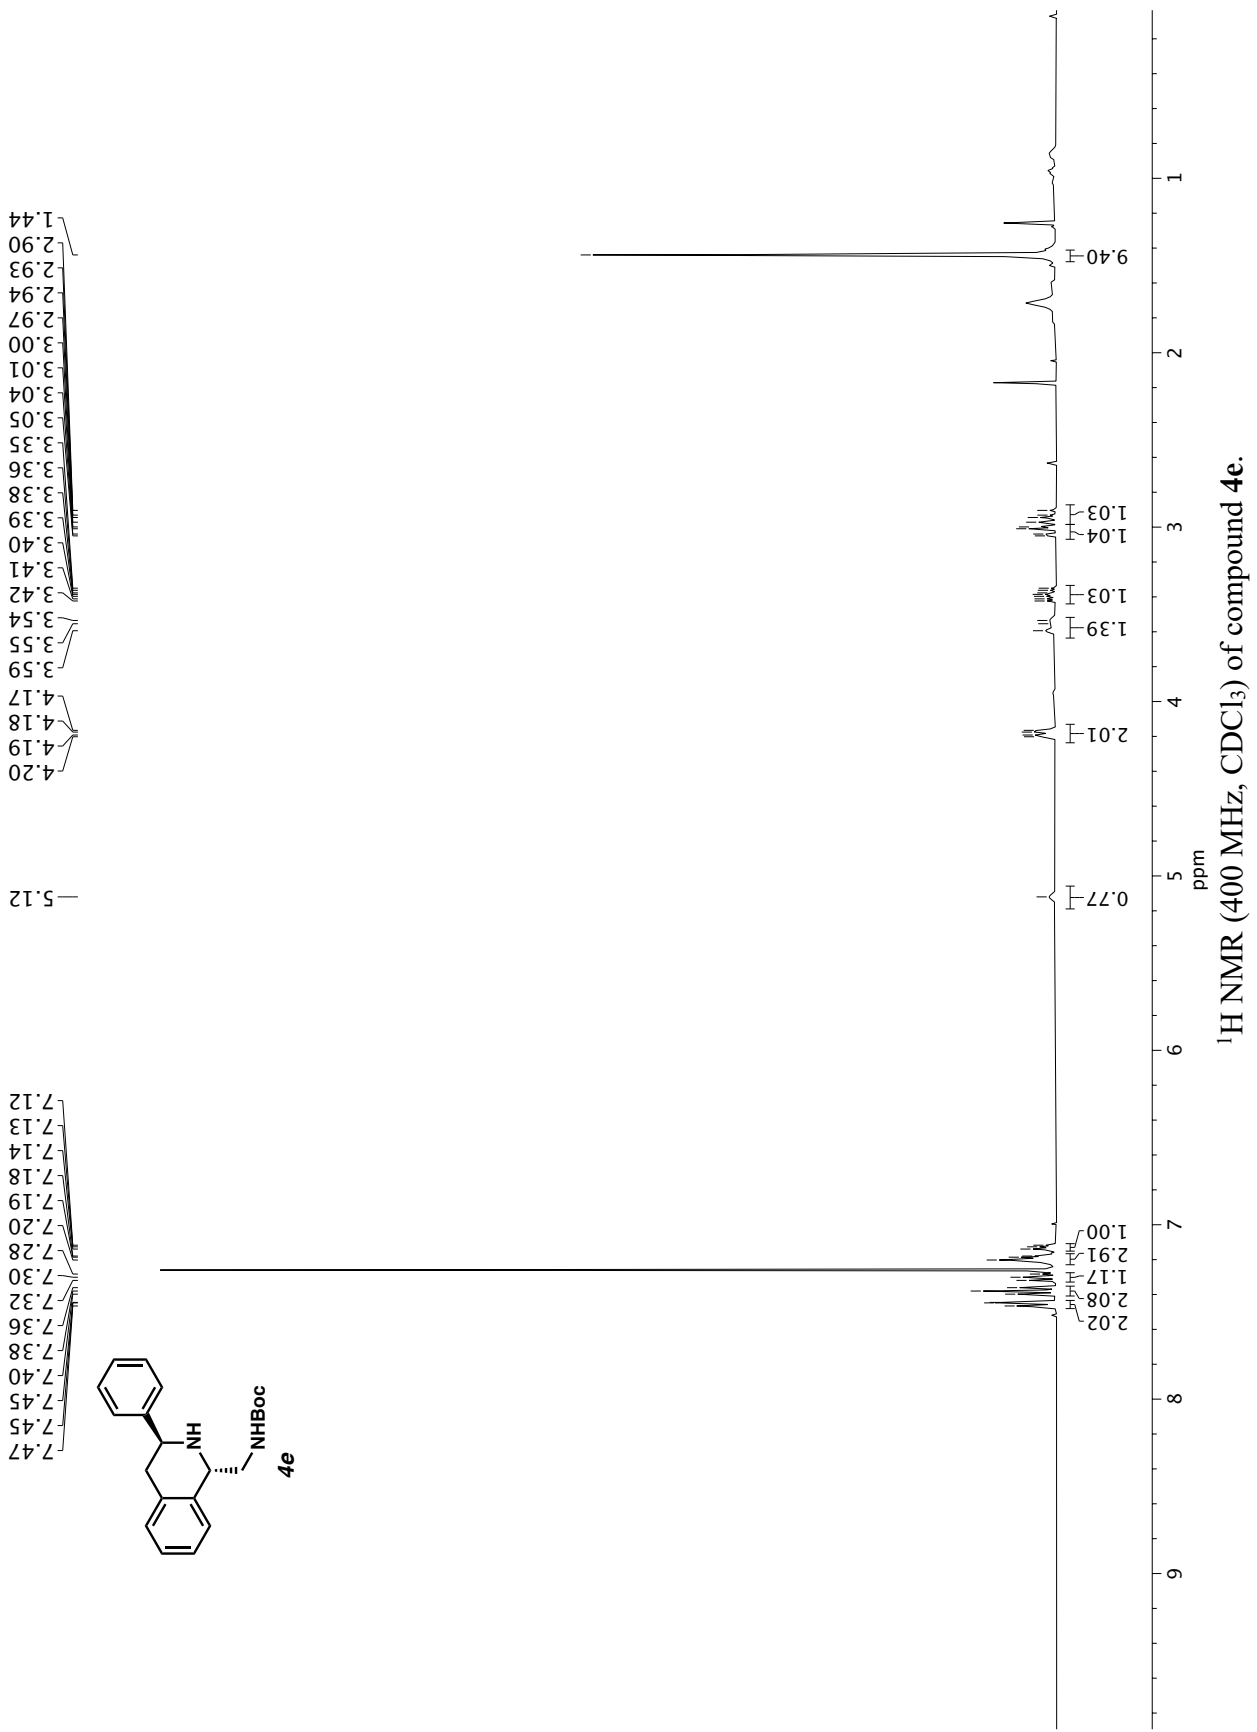

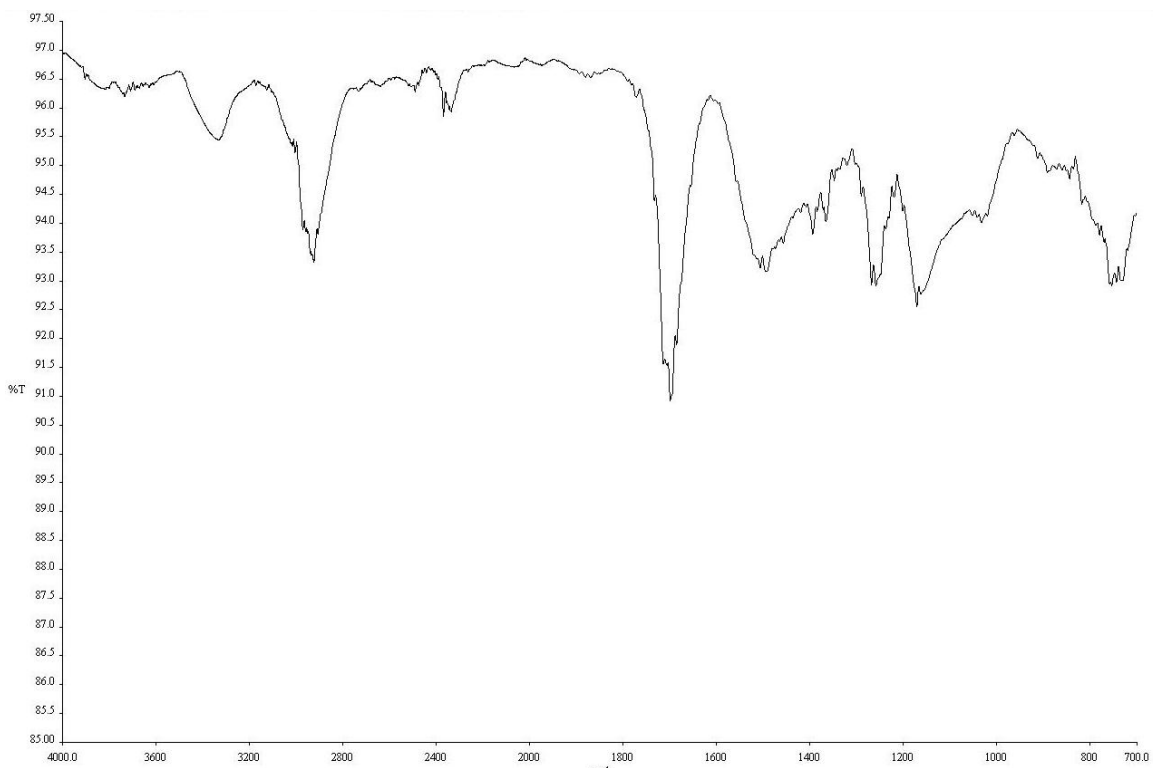

Infrared spectrum (Thin Film, NaCl) of compound **4e**.

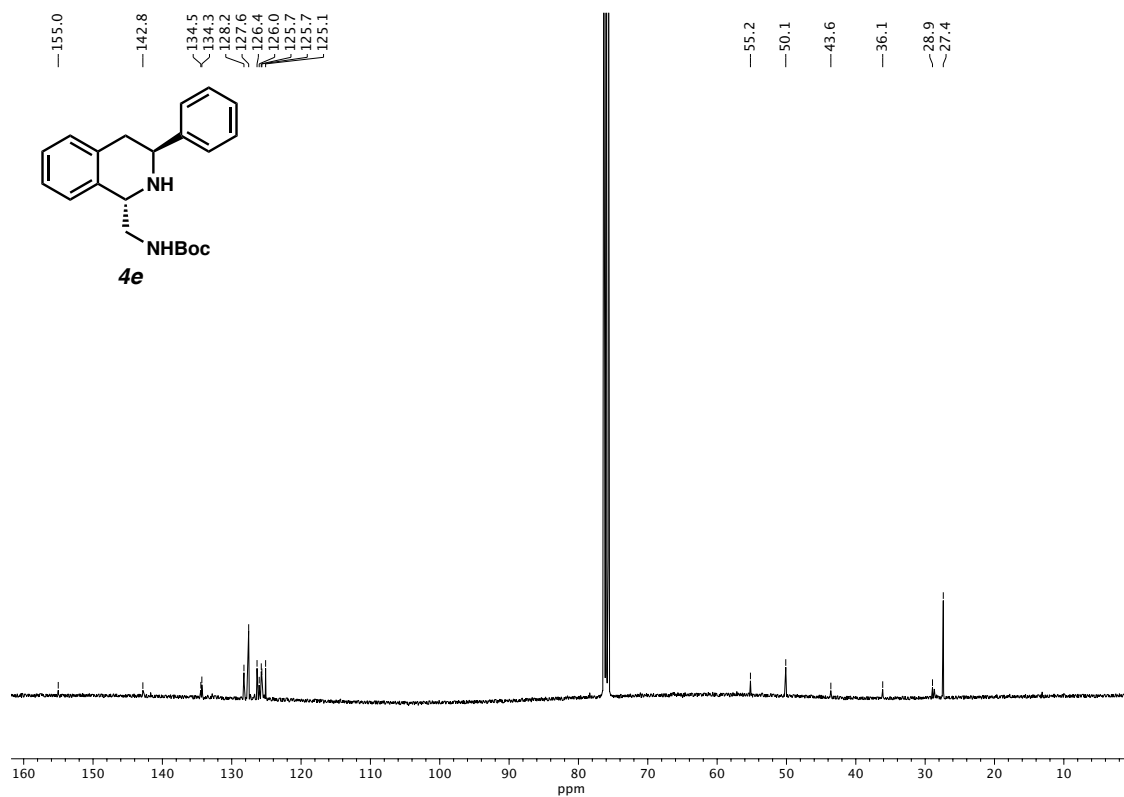

<sup>13</sup>C NMR (100 MHz, CDCl<sub>3</sub>) of compound **4e**.

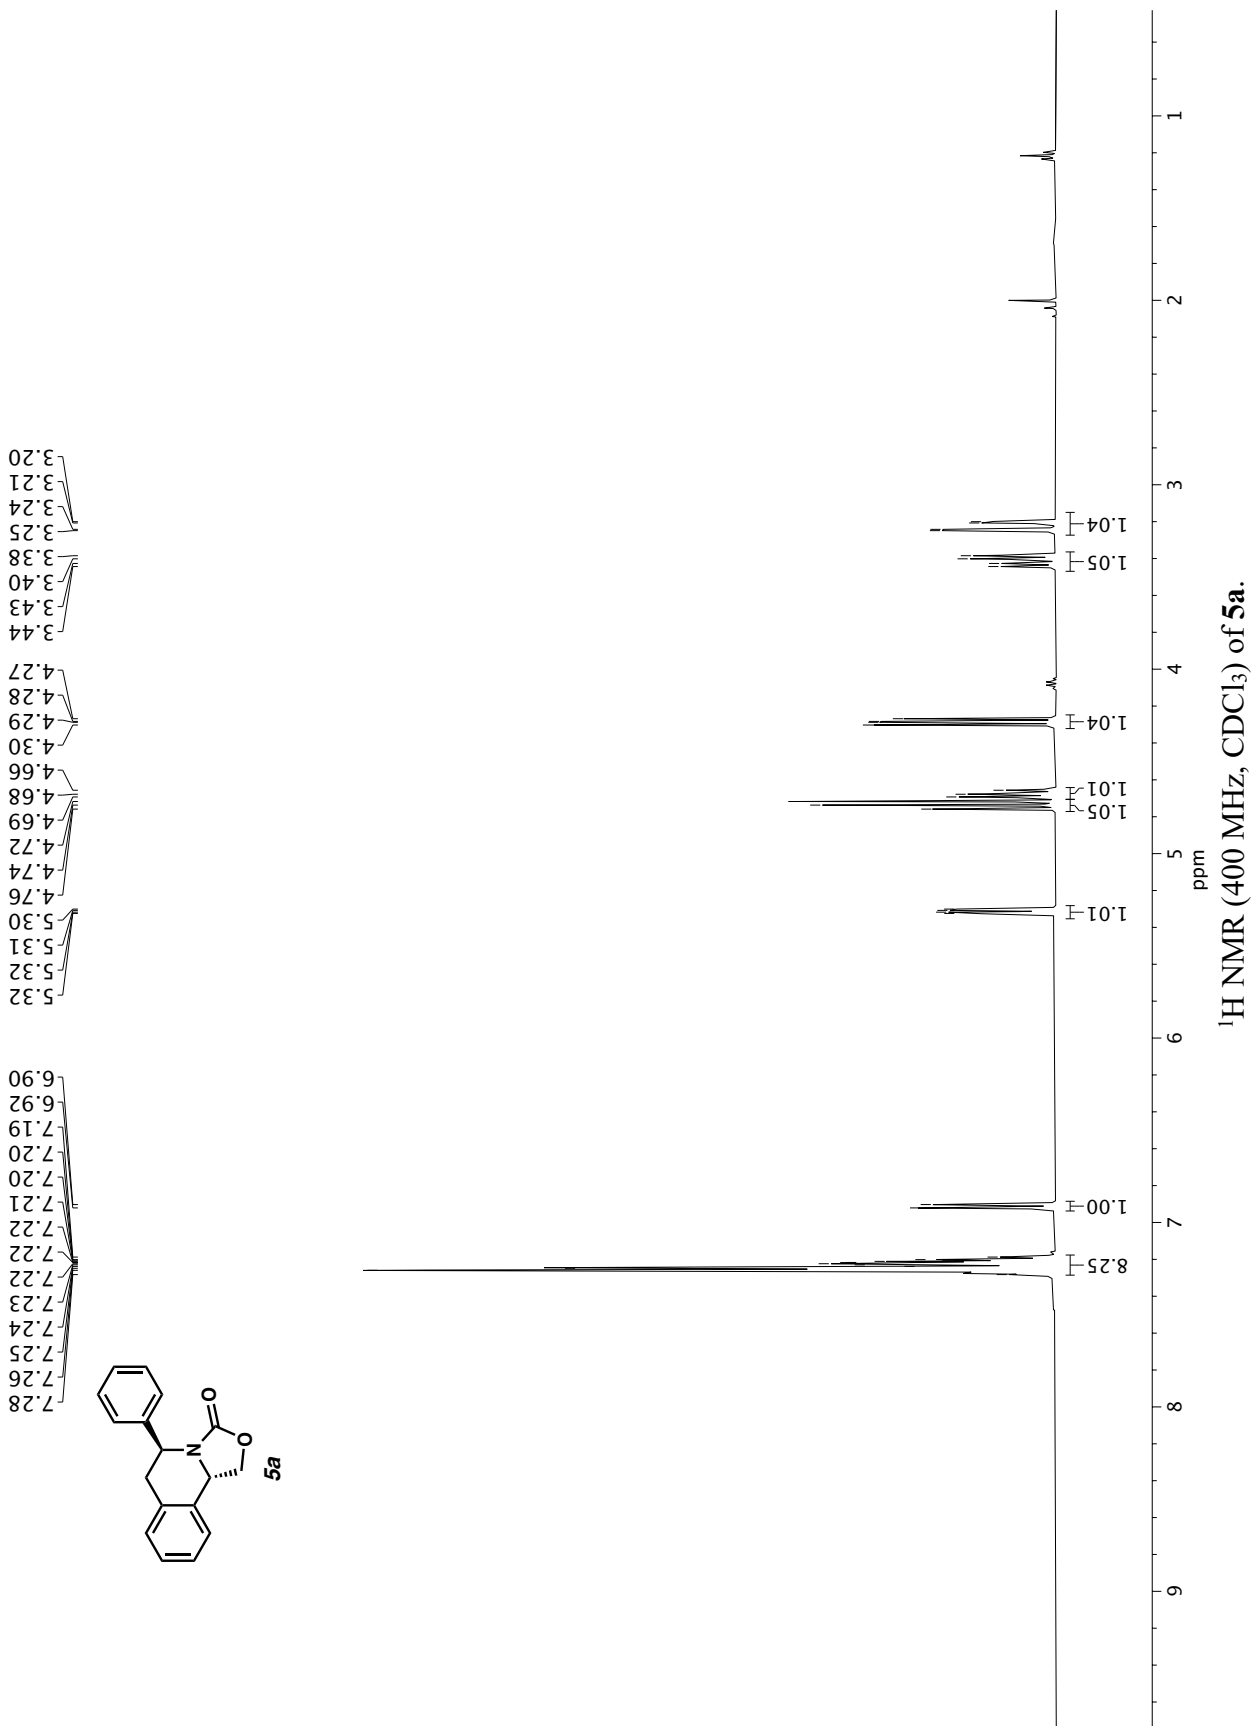

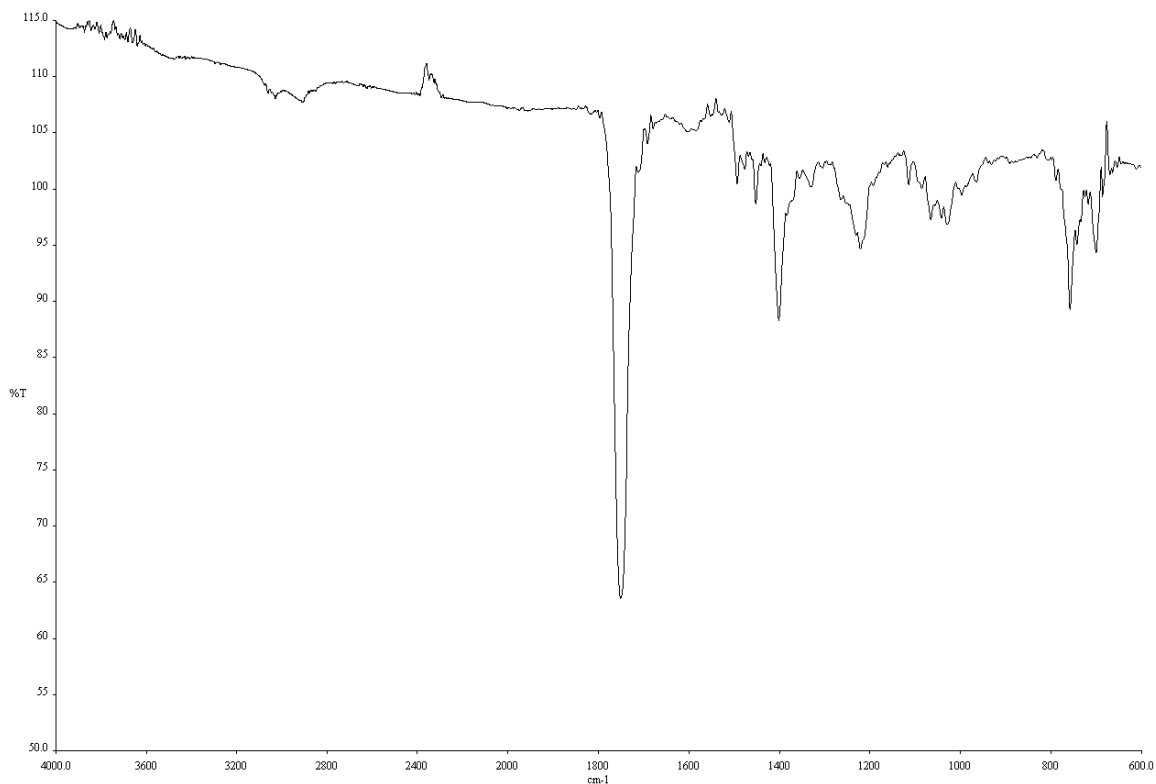

Infrared spectrum (Thin Film, NaCl) of **5a**.

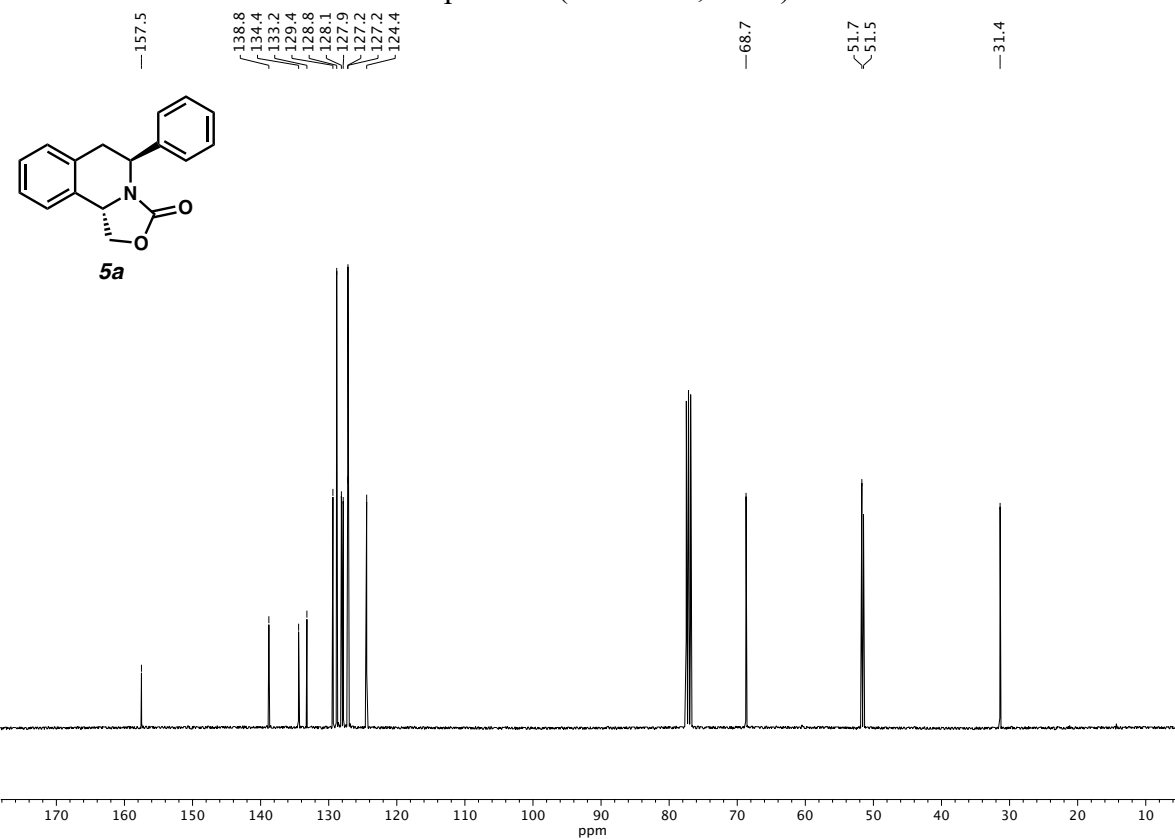

$^{13}\text{C}$  NMR (100 MHz,  $\text{CDCl}_3$ ) of **5a**.

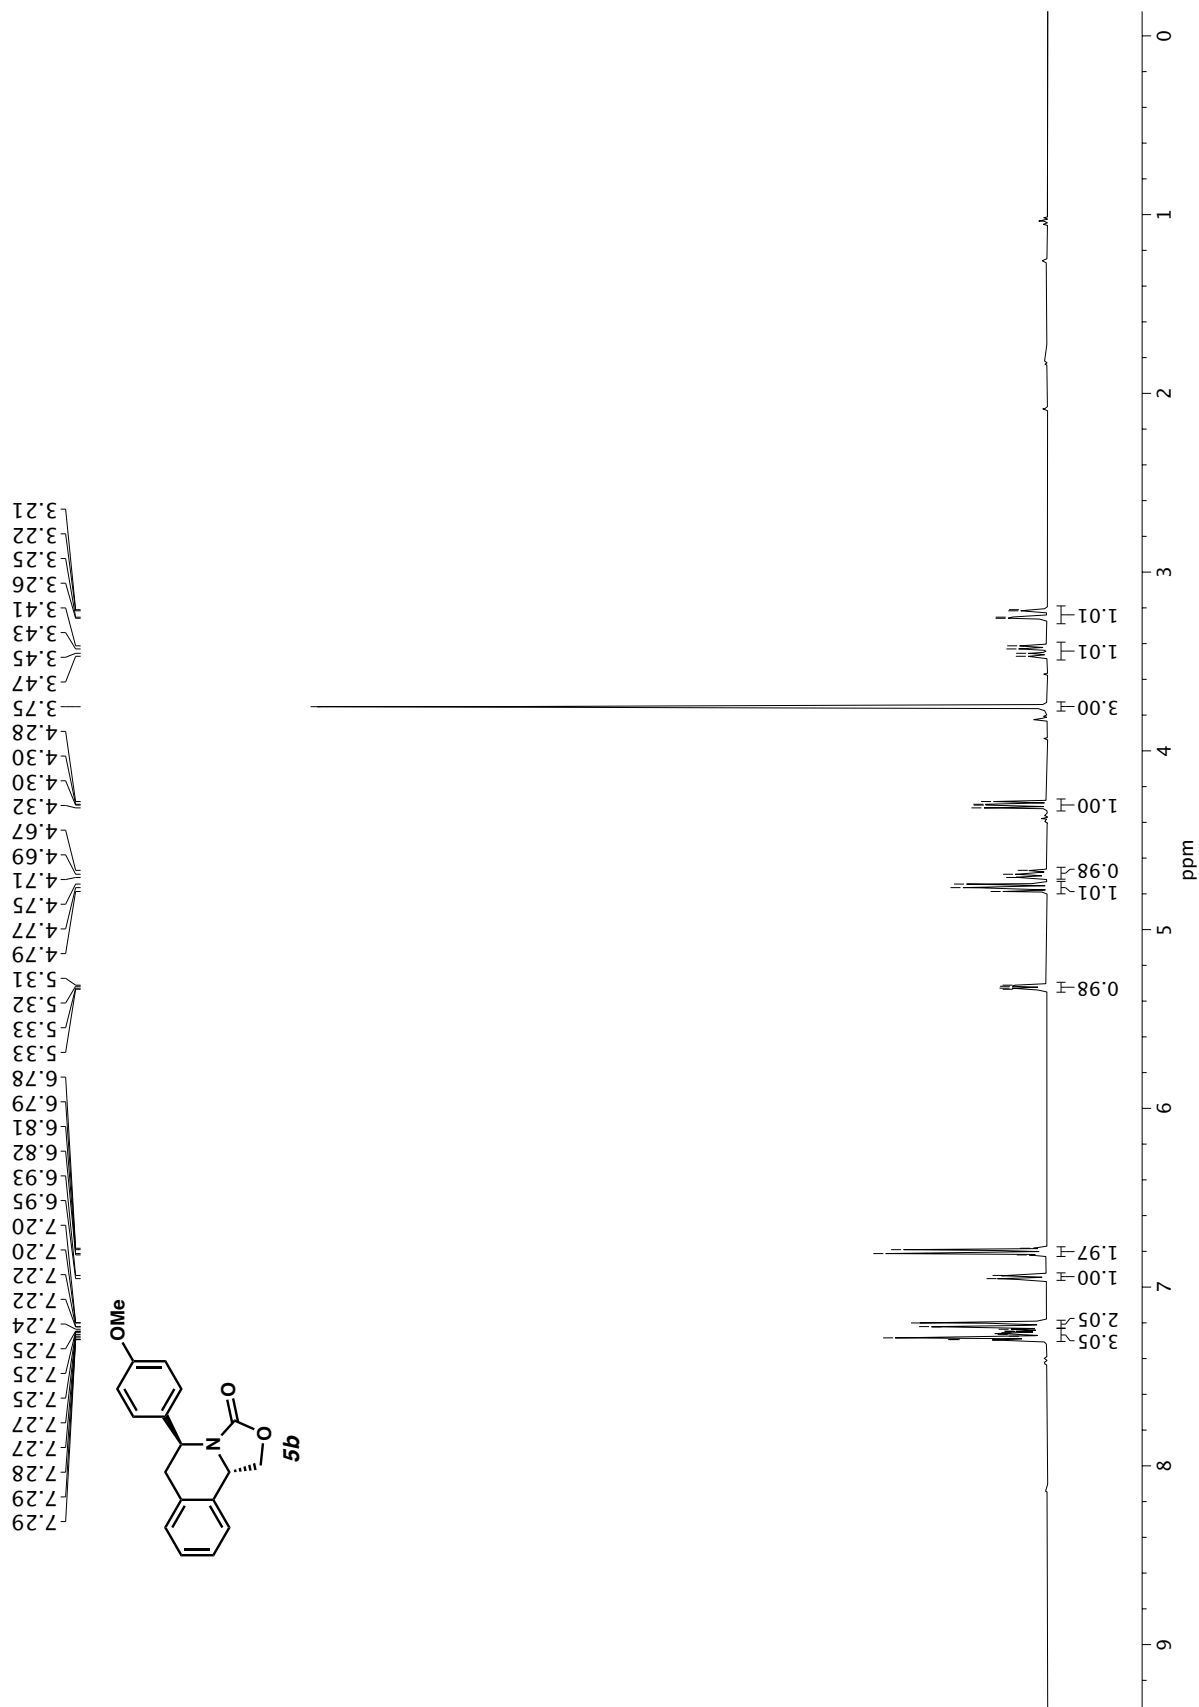

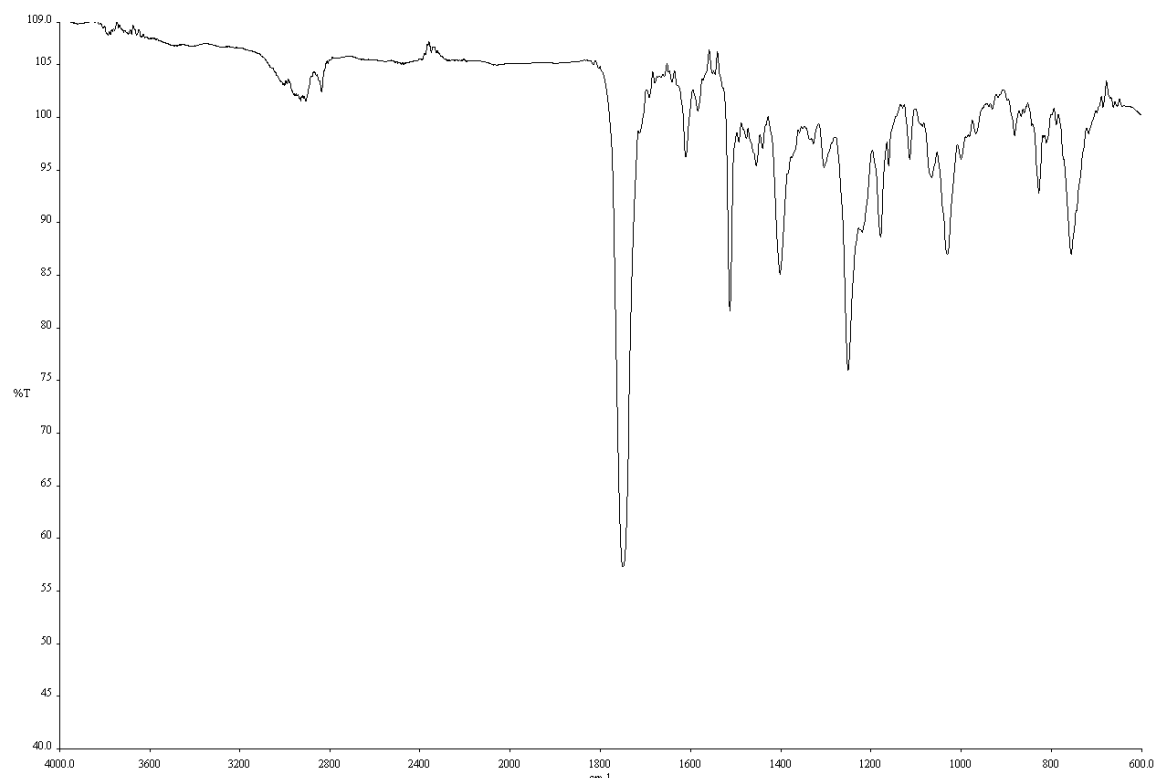

Infrared spectrum (Thin Film, NaCl) of **5b**.

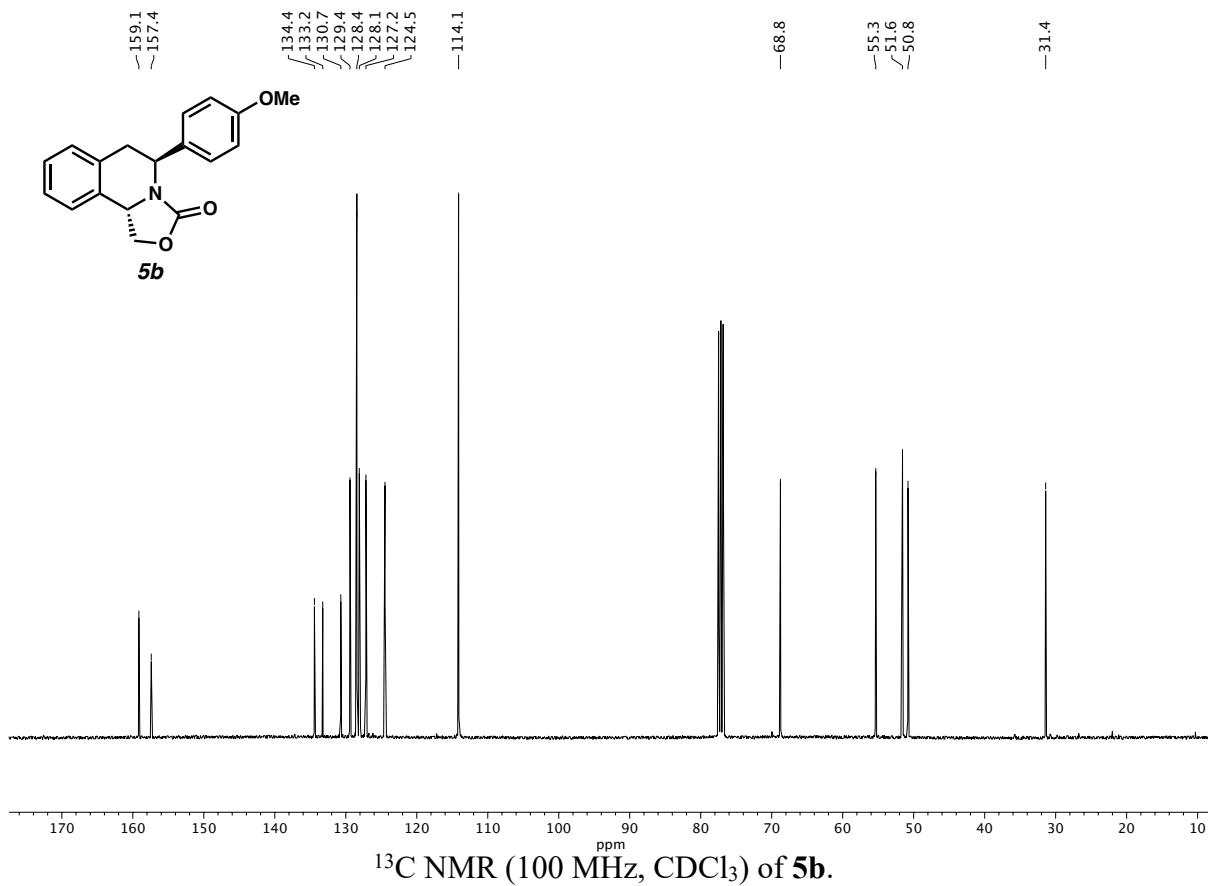

$^{13}\text{C}$  NMR (100 MHz,  $\text{CDCl}_3$ ) of **5b**.

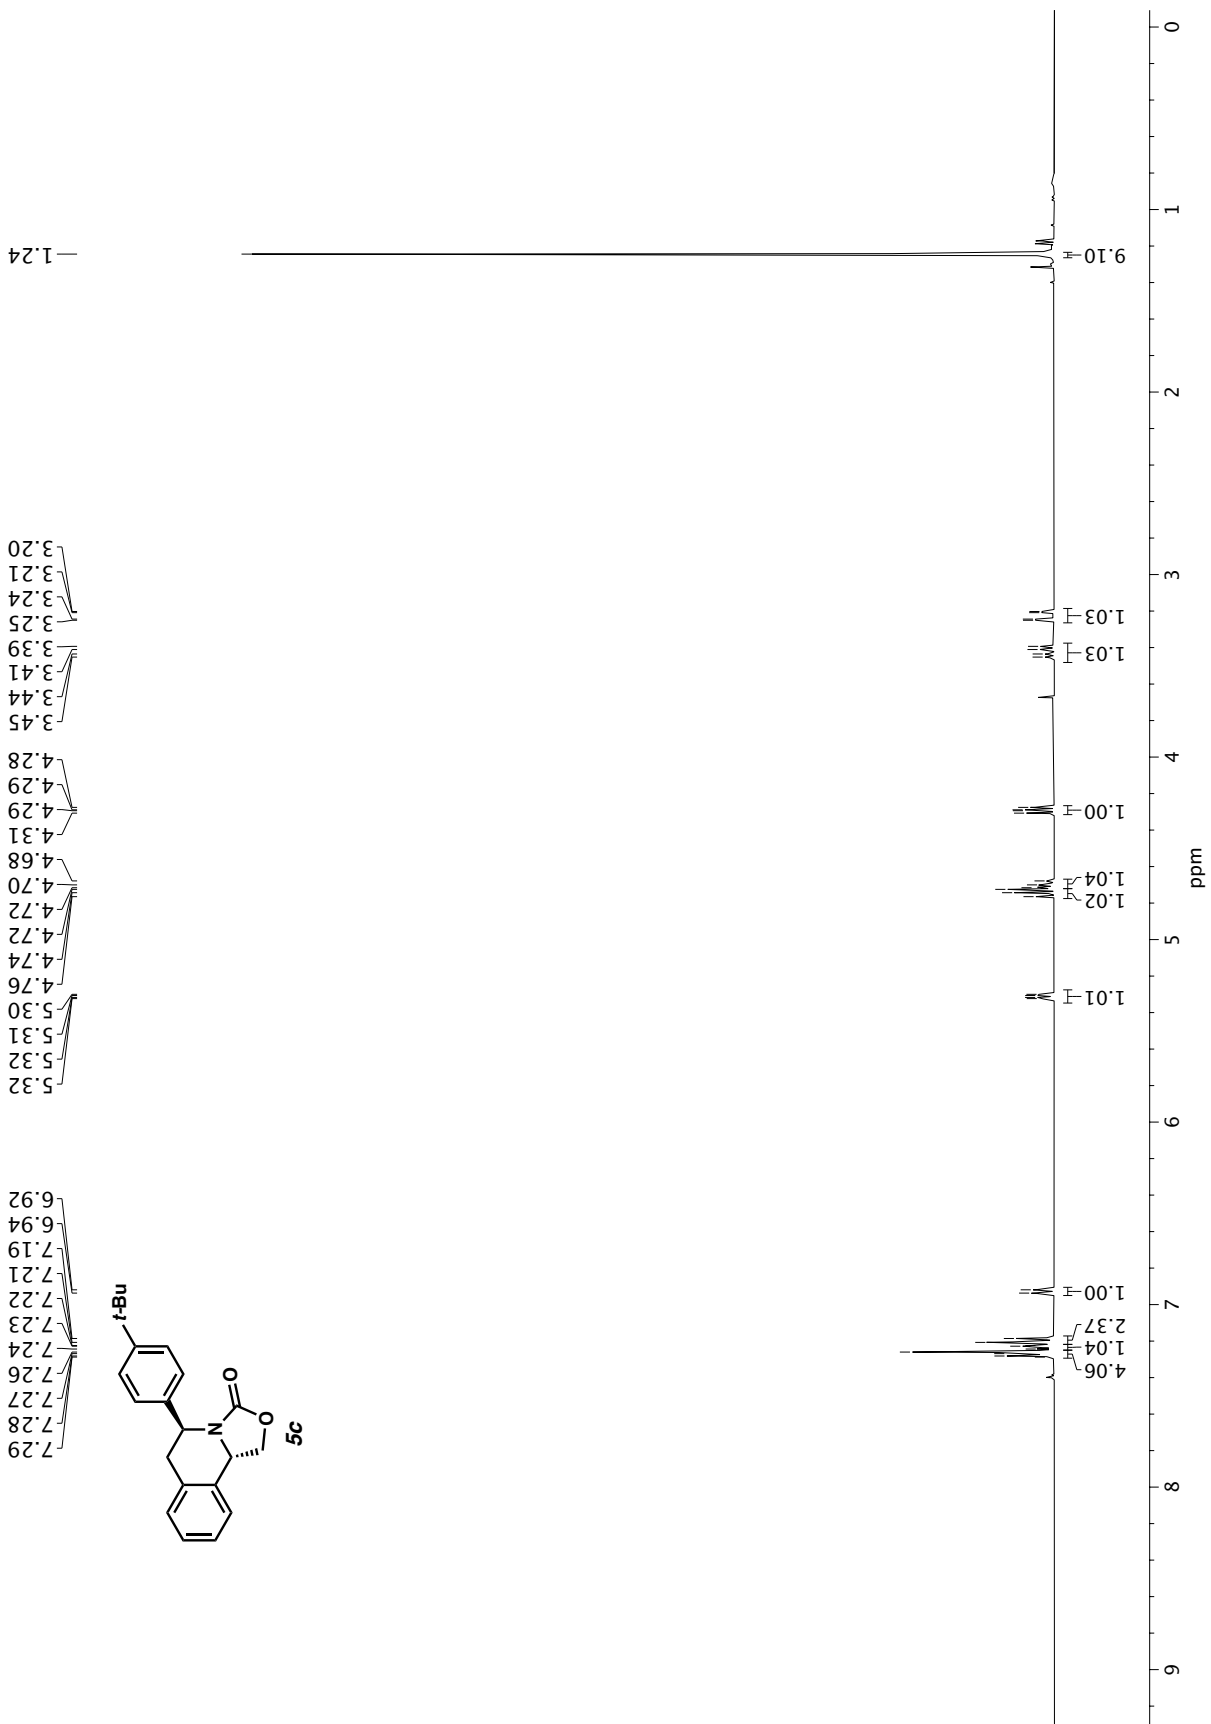

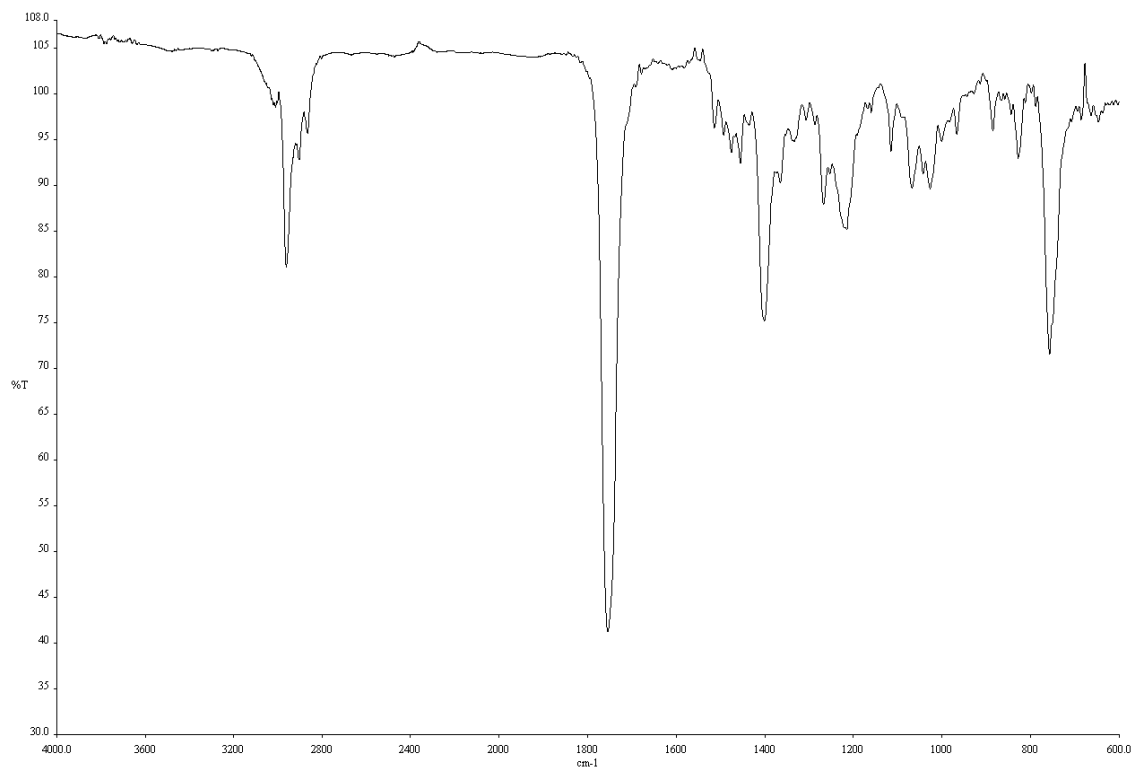

Infrared spectrum (Thin Film, NaCl) of **5c**.

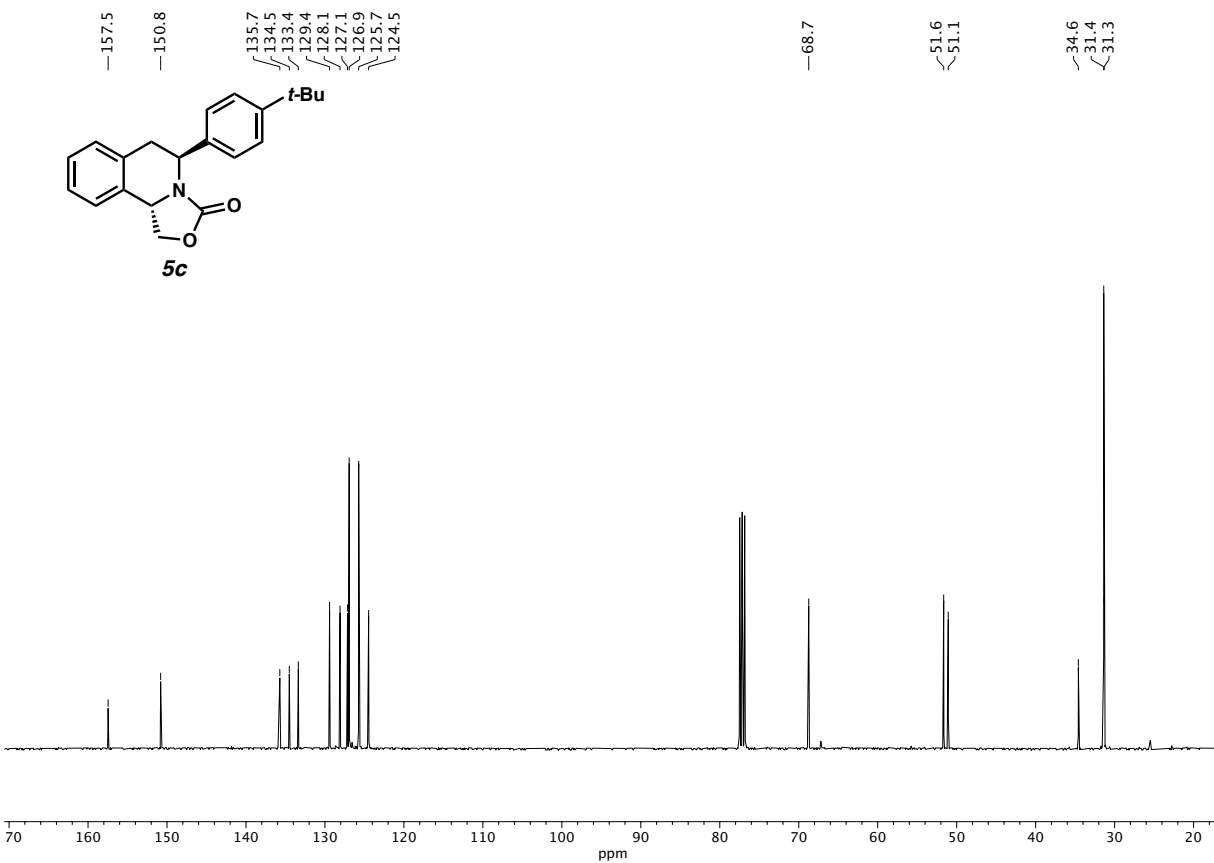

$^{13}\text{C}$  NMR (100 MHz,  $\text{CDCl}_3$ ) of **5c**.



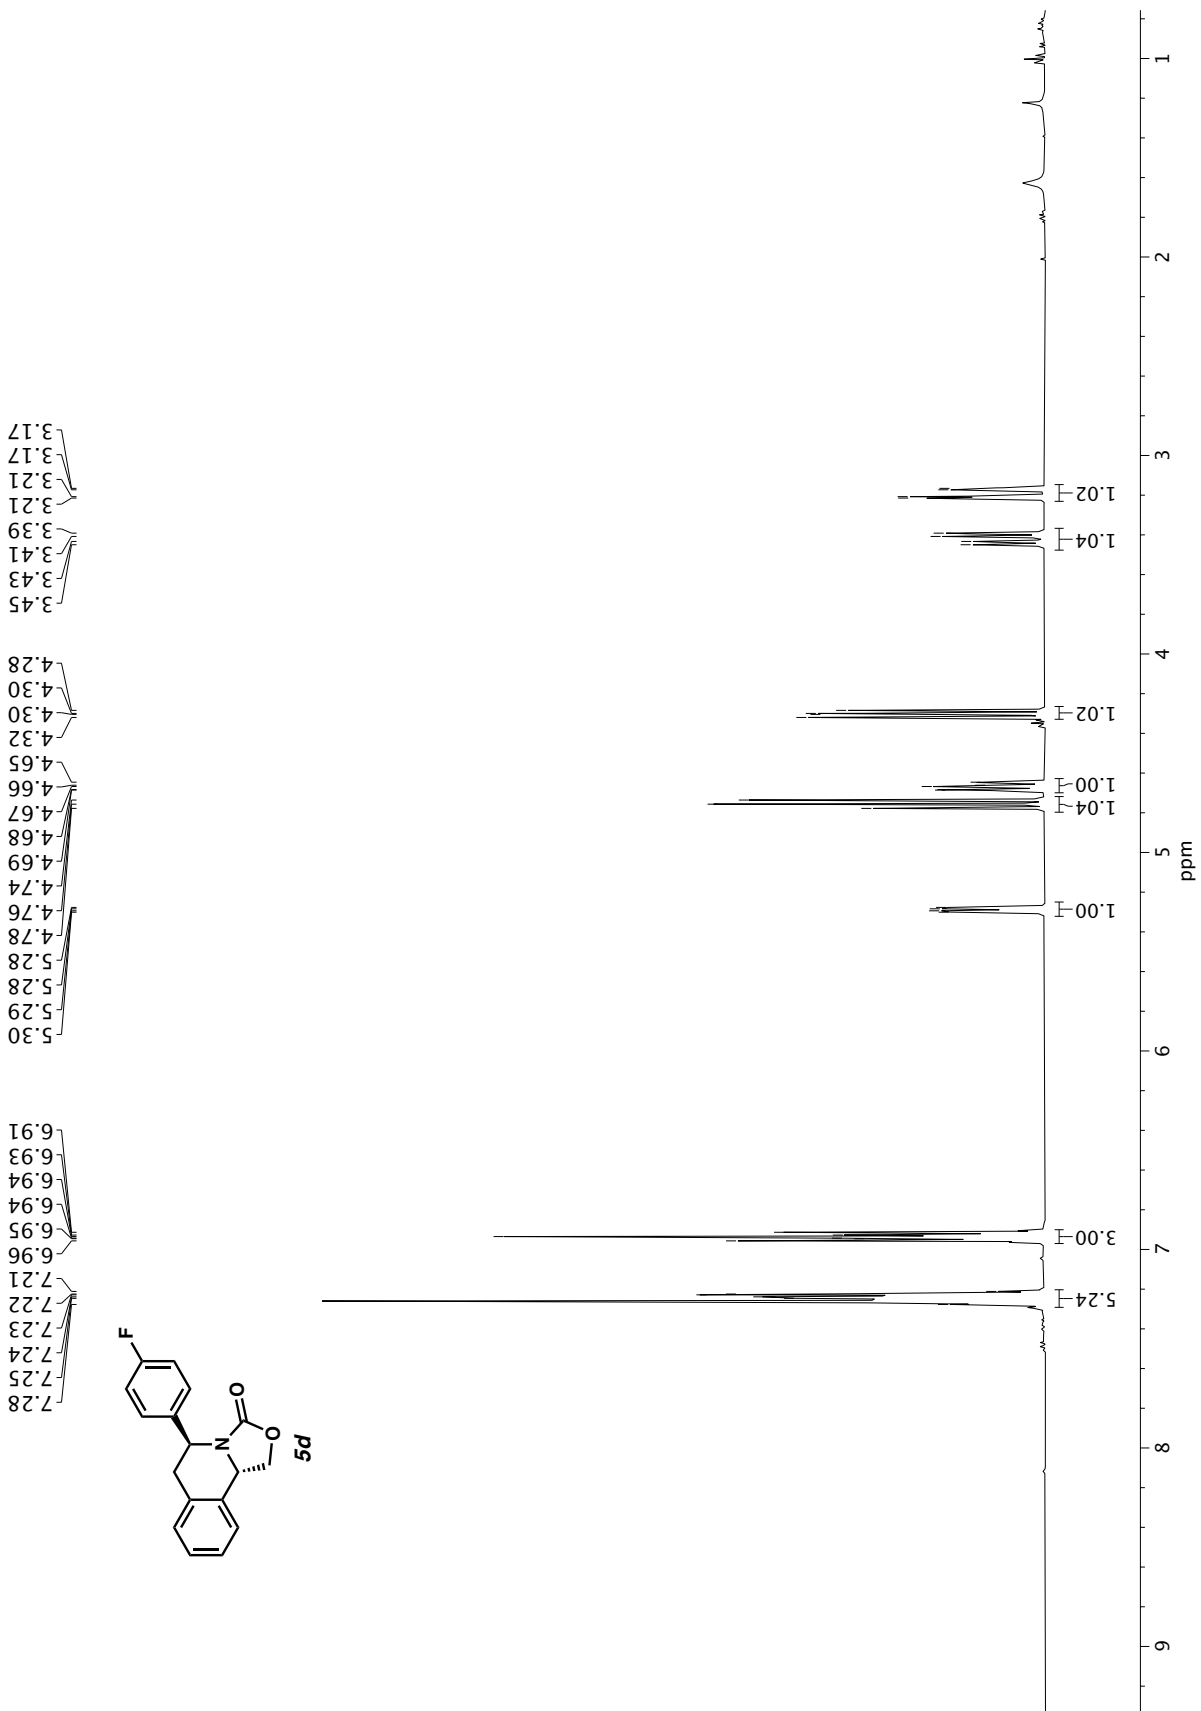

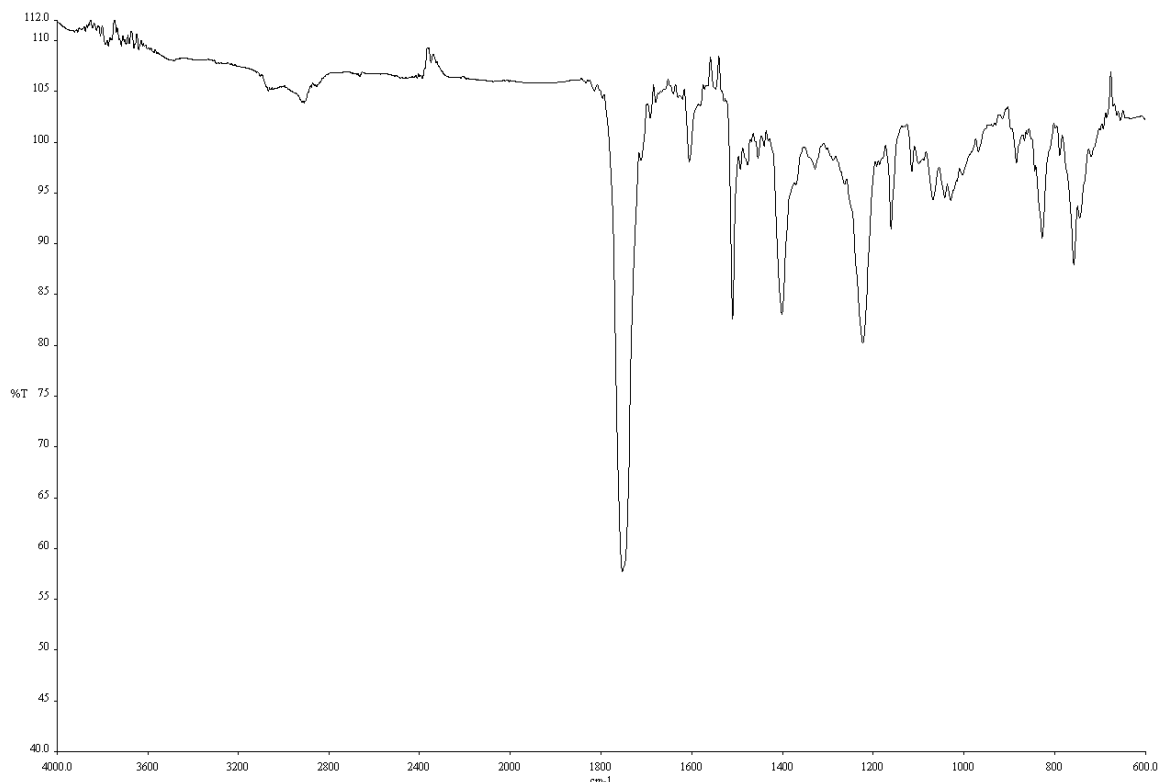

Infrared spectrum (Thin Film, NaCl) of **5d**.

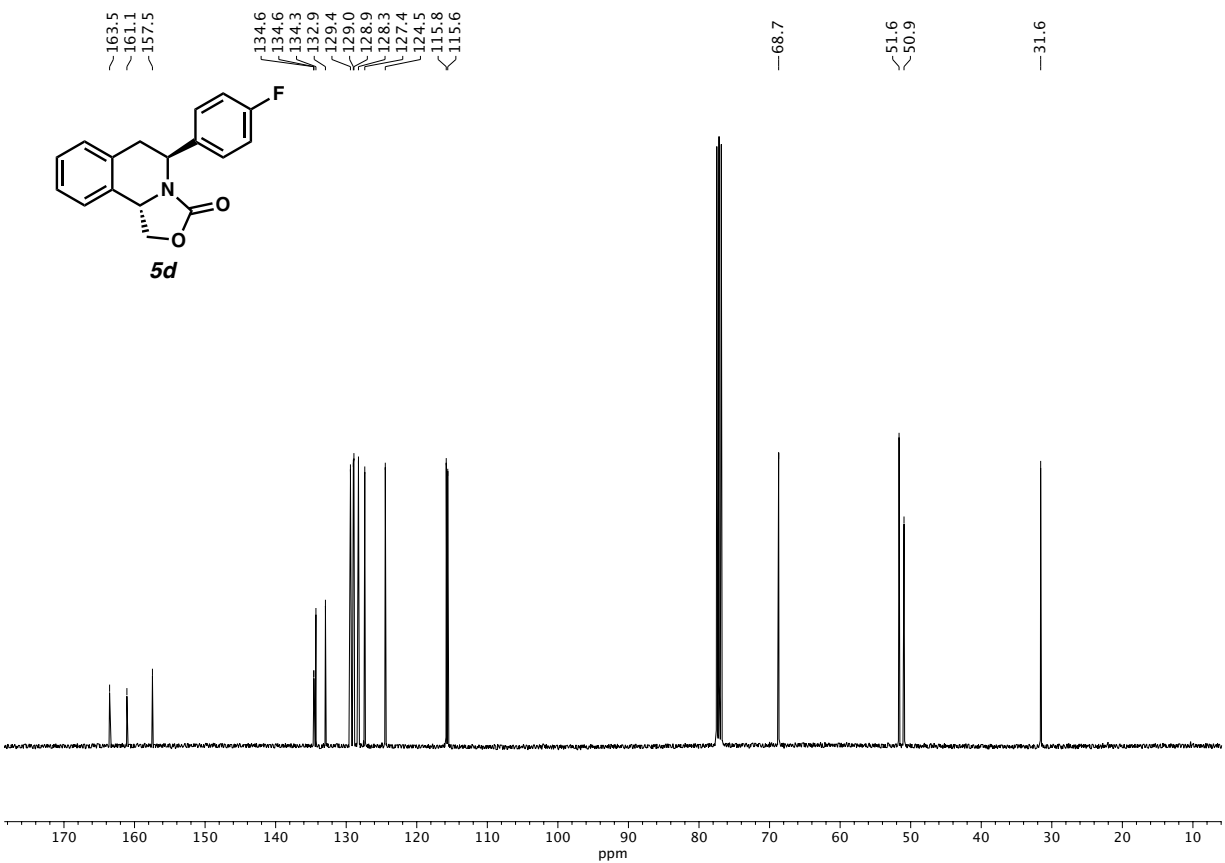

$^{13}\text{C}$  NMR (100 MHz,  $\text{CDCl}_3$ ) of **5d**.

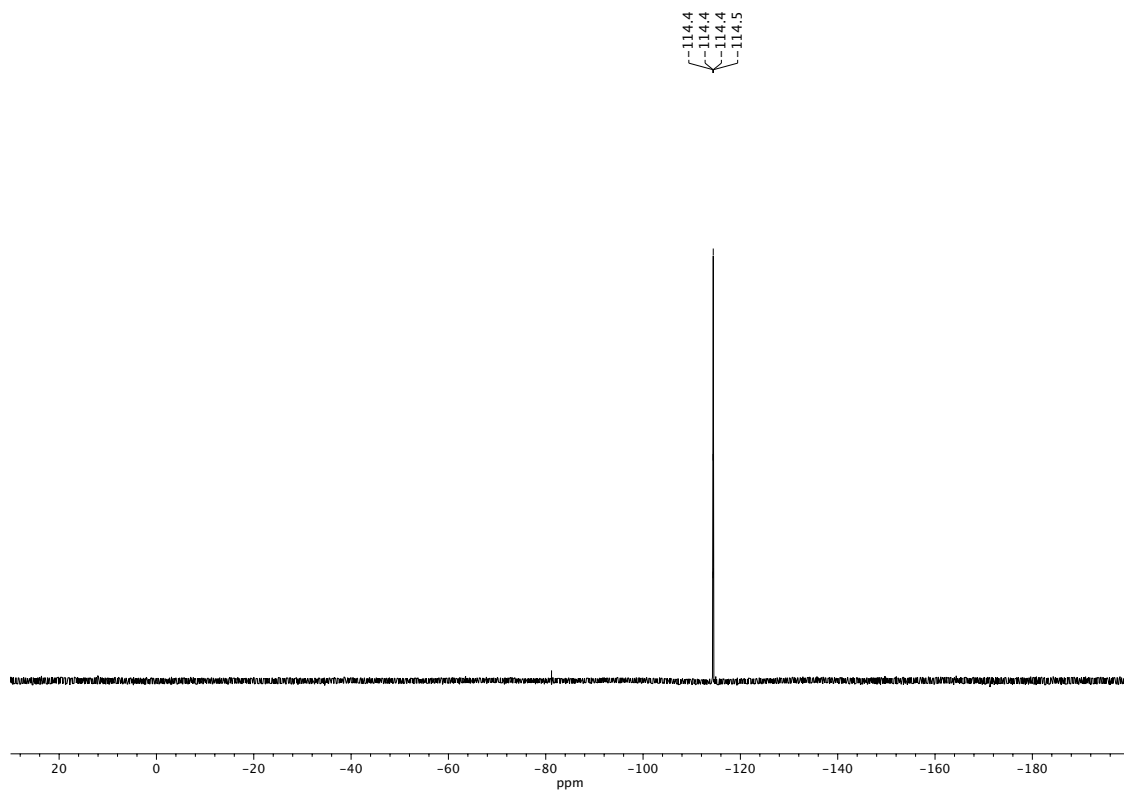

$^{19}\text{F}$  NMR (282 MHz,  $\text{CDCl}_3$ ) of **5d**.

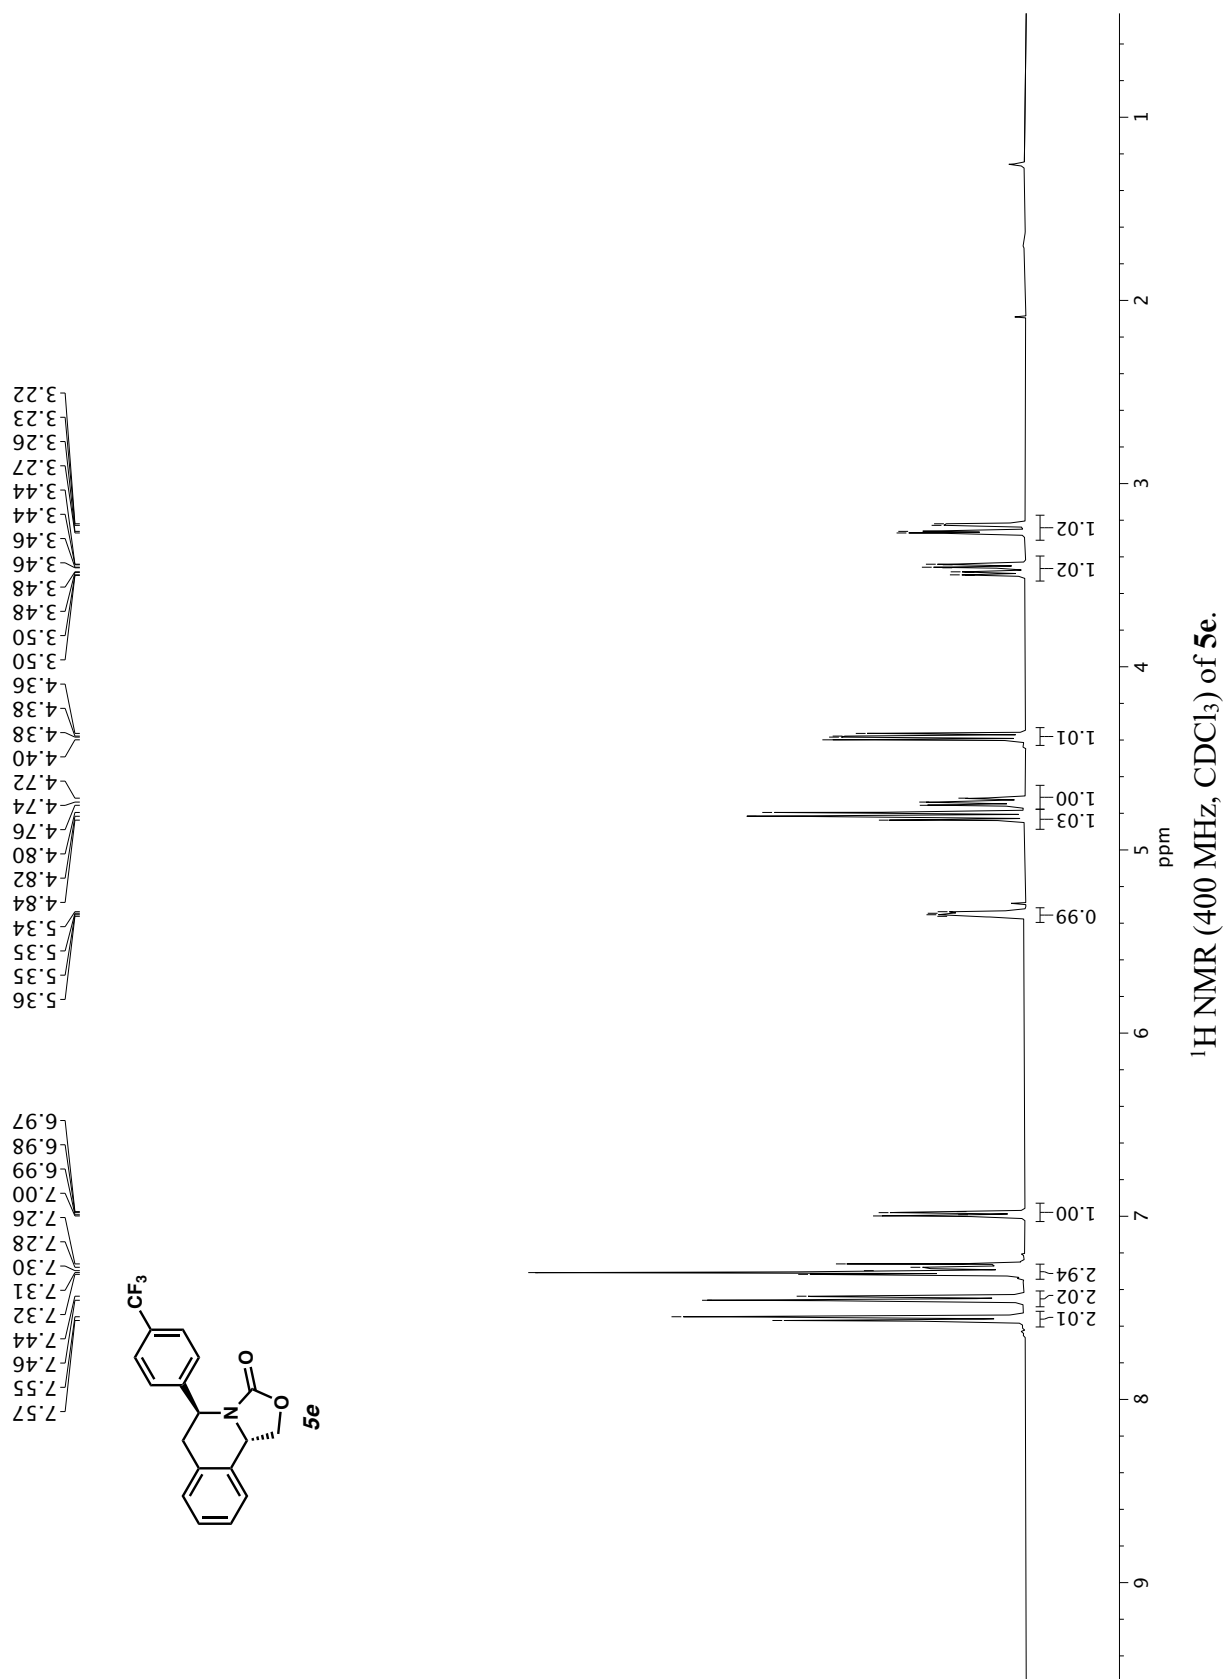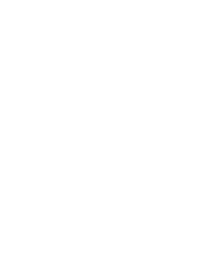

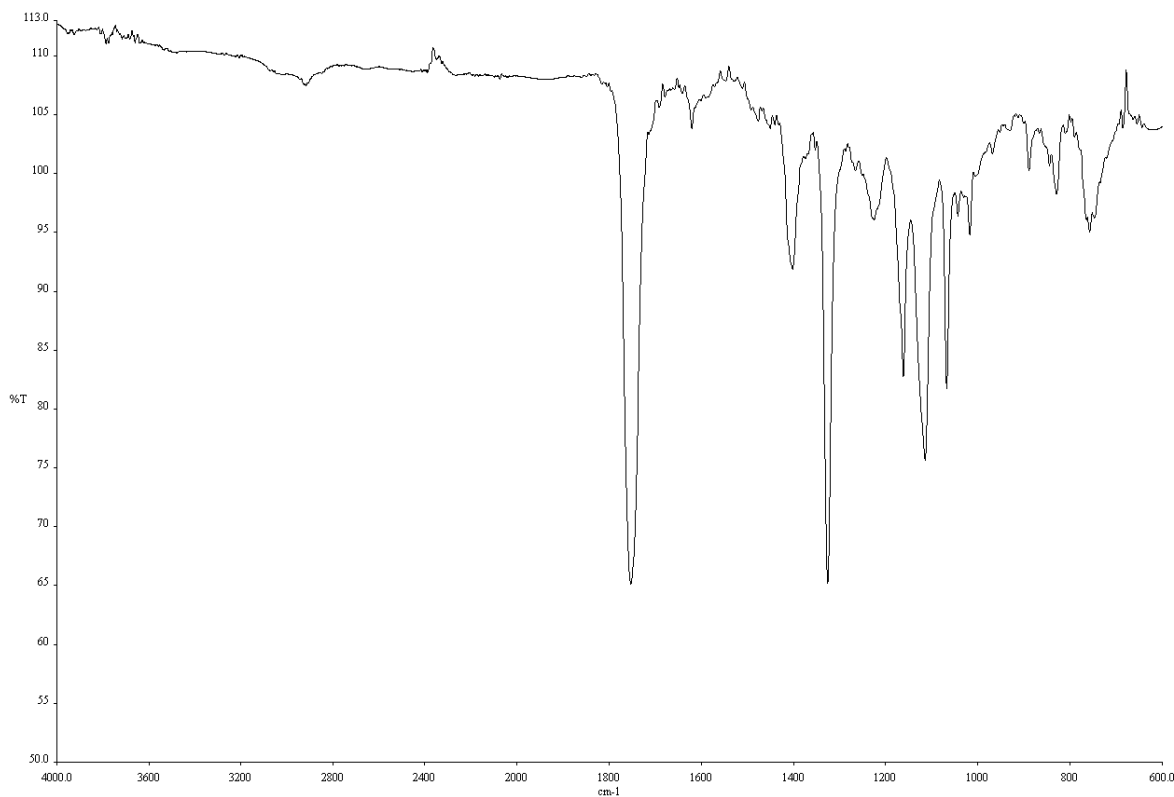

Infrared spectrum (Thin Film, NaCl) of **5e**.

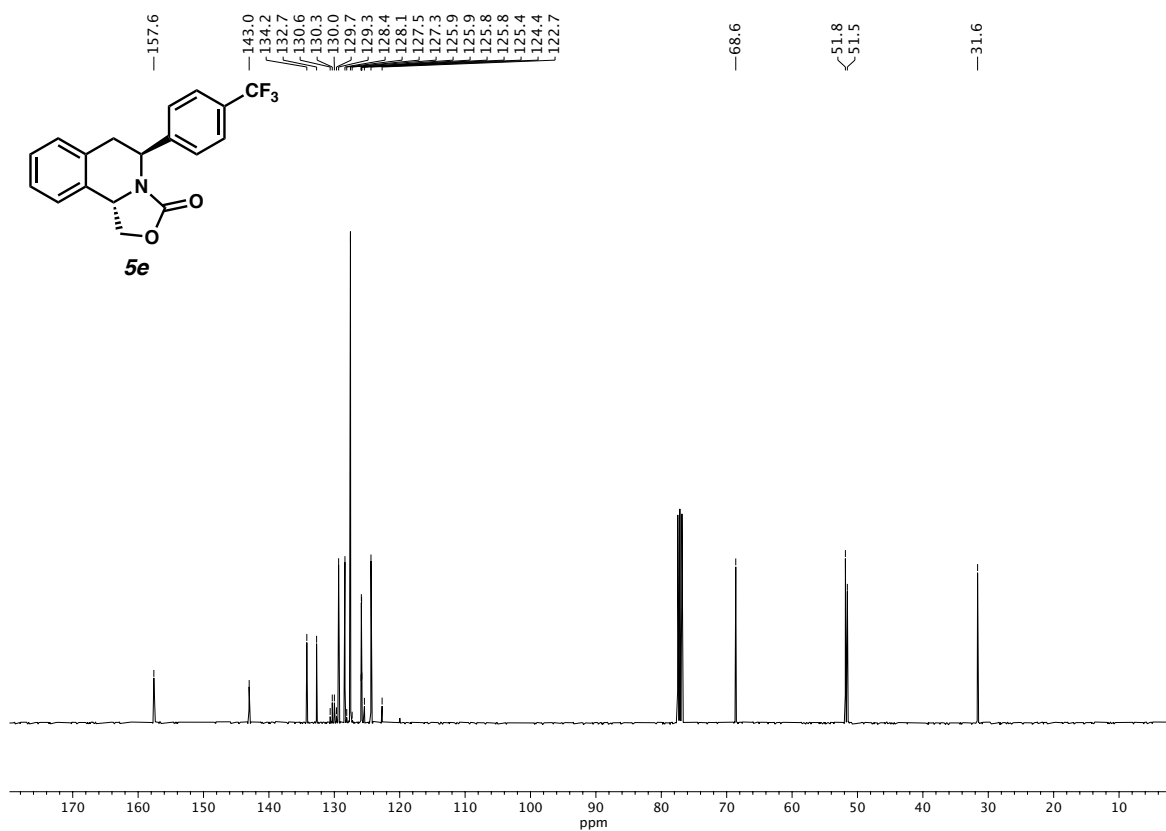

<sup>13</sup>C NMR (100 MHz, CDCl<sub>3</sub>) of **5e**.

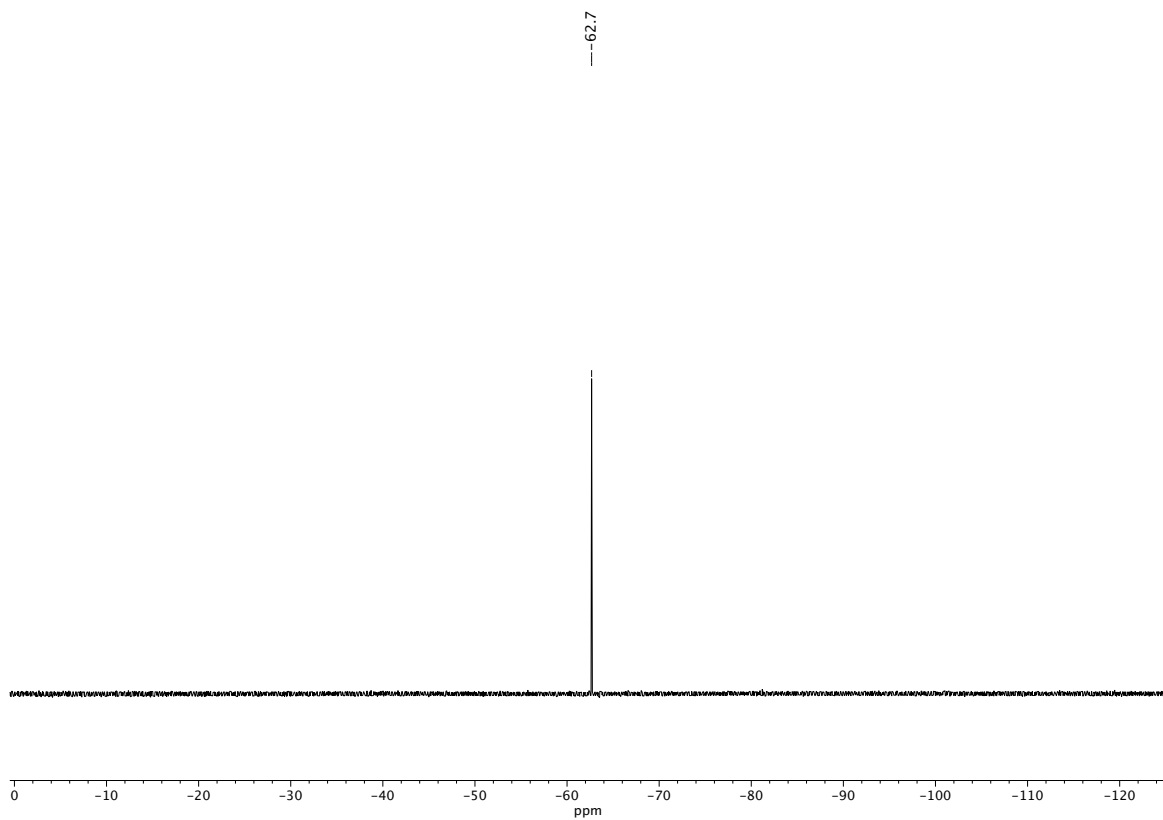

$^{19}\text{F}$  NMR (282 MHz,  $\text{CDCl}_3$ ) of **5e**.

7.61  
7.60  
7.59  
7.58  
7.46  
7.45  
7.44  
7.43  
7.32  
7.31  
7.30  
7.29  
7.27  
7.01  
7.00  
6.99  
5.32  
5.31  
5.30  
5.29  
4.85  
4.83  
4.80  
4.76  
4.75  
4.74  
4.72  
4.42  
4.40  
4.40  
4.38  
3.48  
3.47  
3.44  
3.42  
3.23  
3.22  
3.19  
3.18

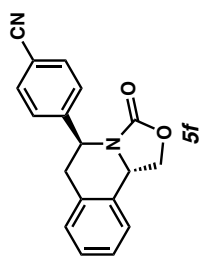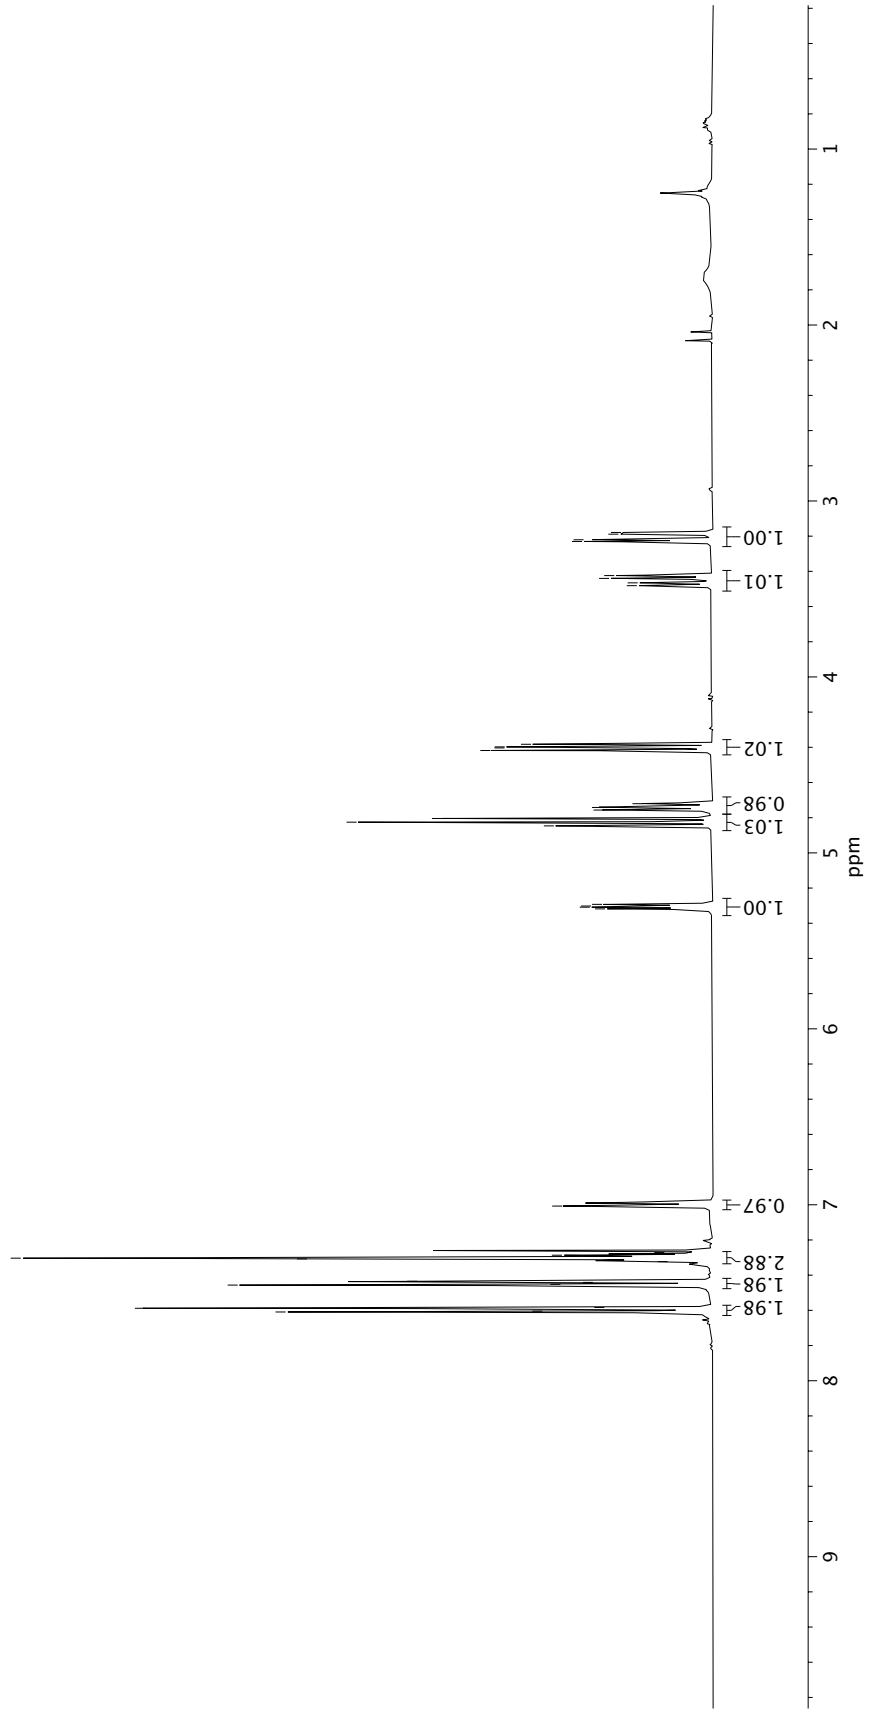

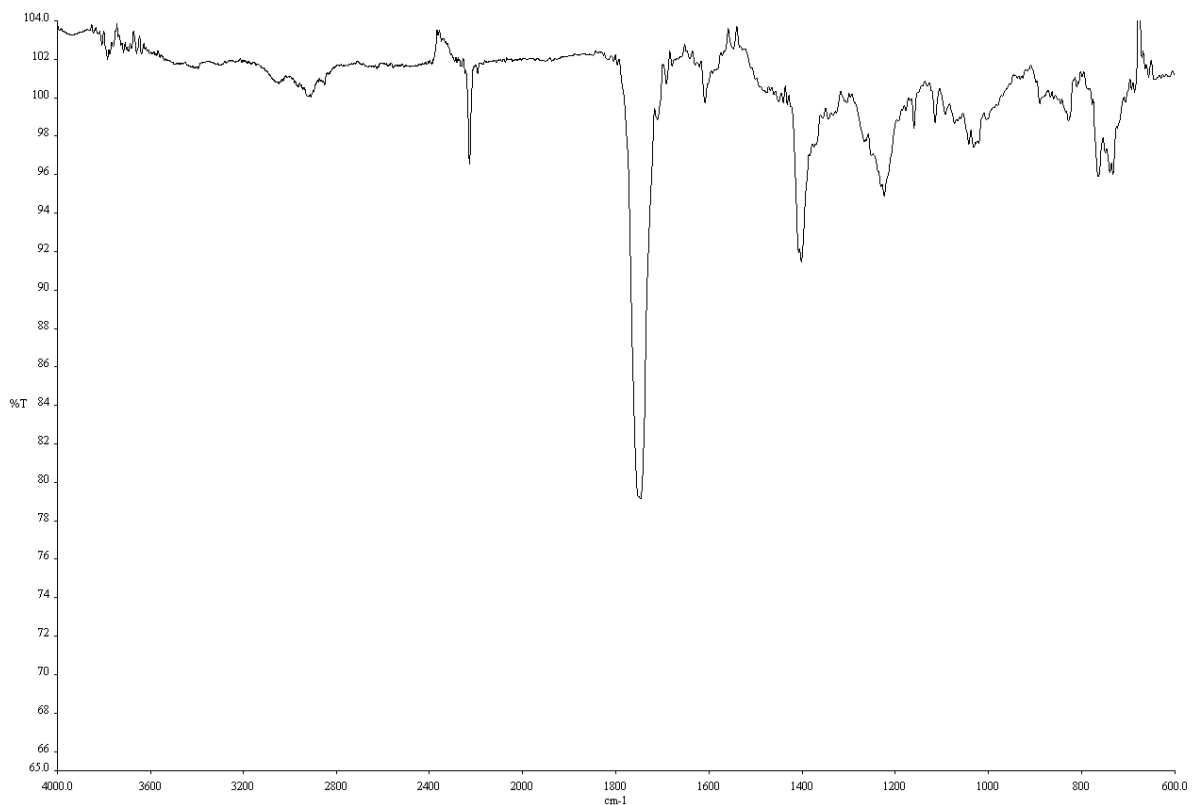

Infrared spectrum (Thin Film, NaCl) of **5f**.

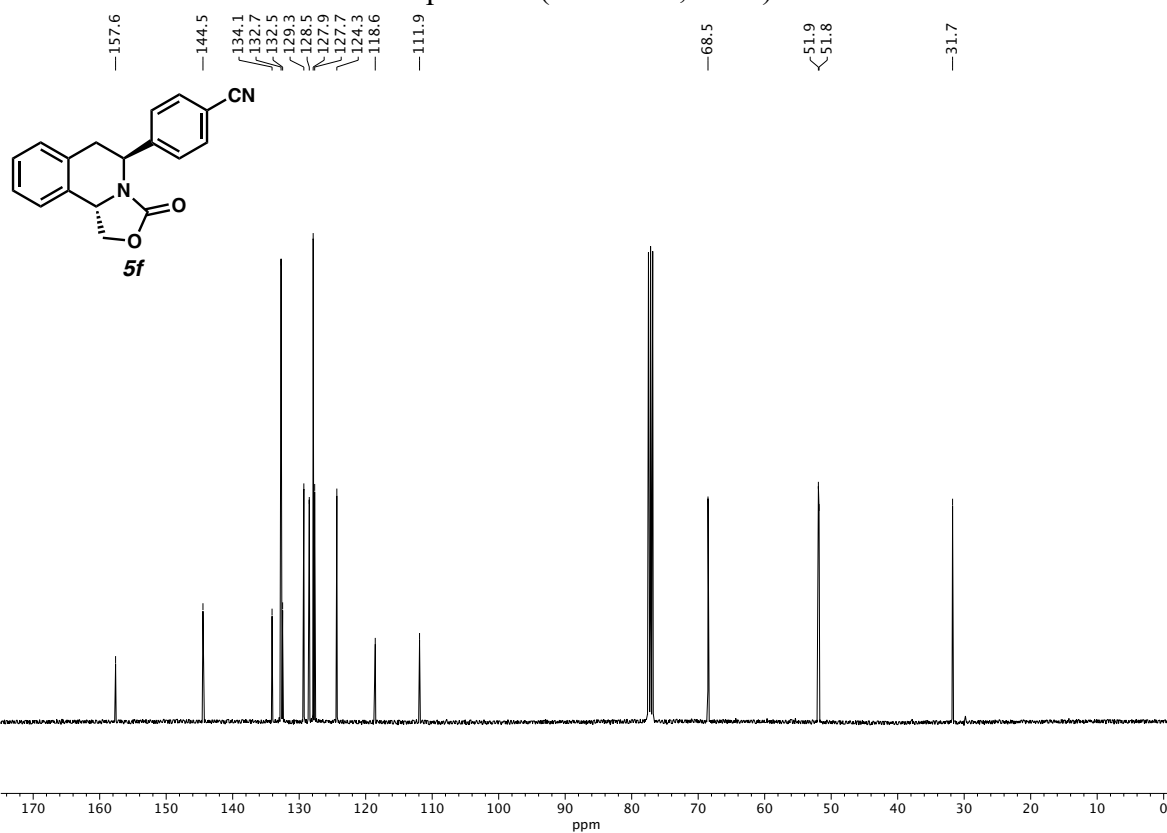

$^{13}\text{C}$  NMR (100 MHz,  $\text{CDCl}_3$ ) of **5f**.



7.55  
7.53  
7.51  
7.44  
7.42  
7.40  
7.39  
7.37  
7.36  
7.34  
7.33  
7.31  
7.30  
7.27  
7.26  
7.25  
6.99  
6.97  
5.42  
5.41  
5.40  
5.39  
4.83  
4.81  
4.79  
4.78  
4.76  
4.39  
4.37  
4.36  
4.35  
4.34  
4.32  
3.52  
3.51  
3.48  
3.46  
3.33  
3.32  
3.29  
3.28

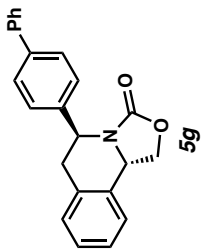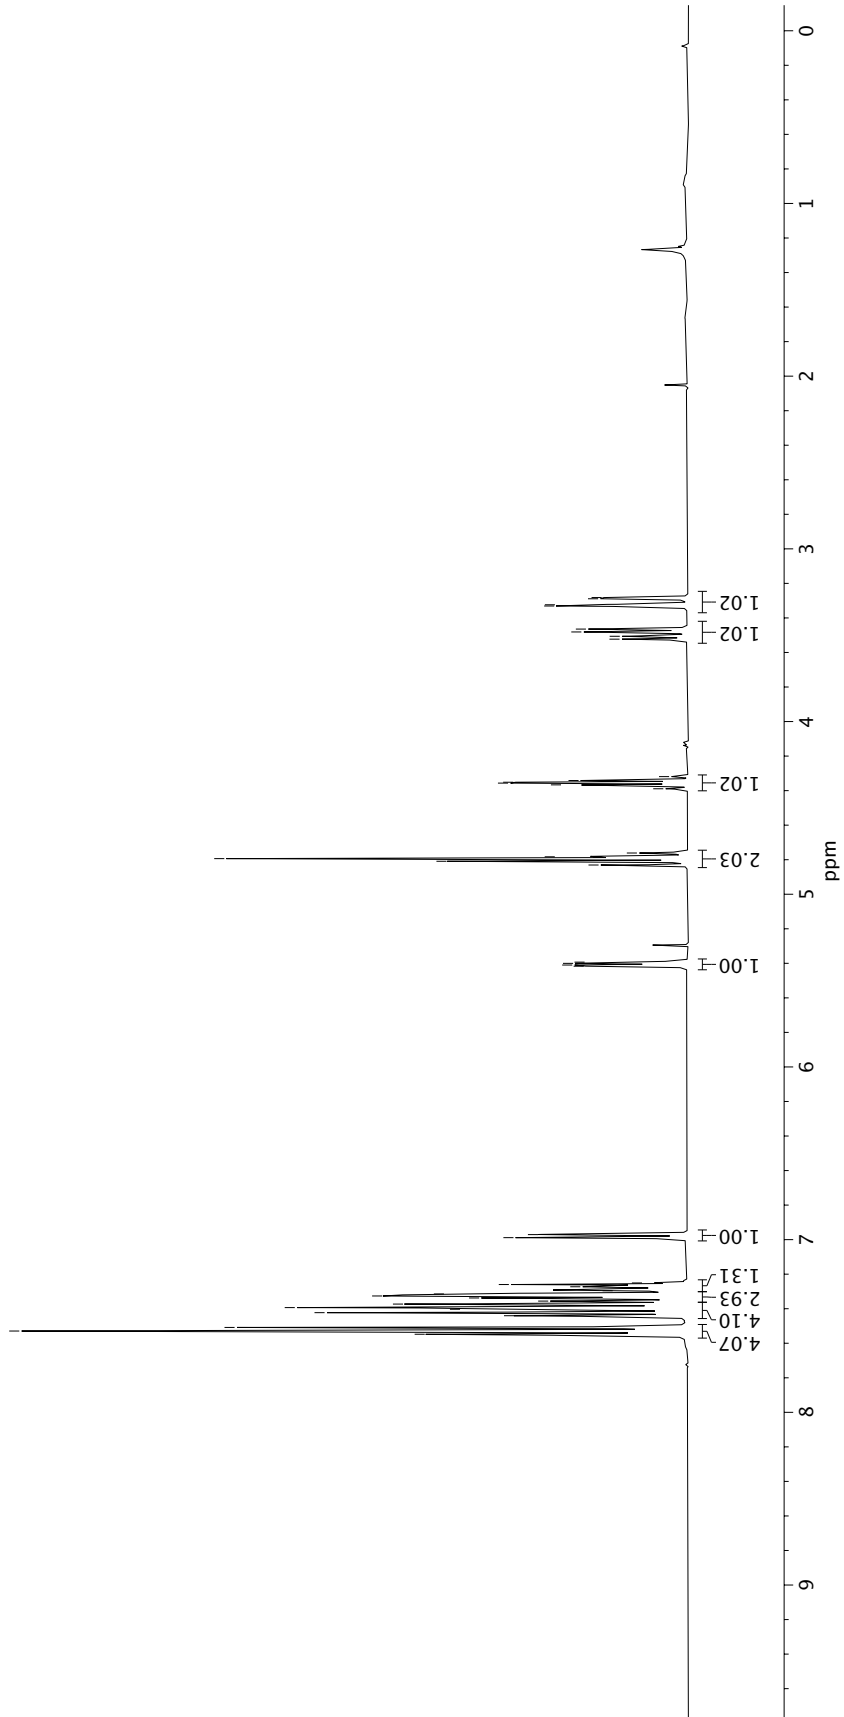

<sup>1</sup>H NMR (400 MHz, CDCl<sub>3</sub>) of **5g**.

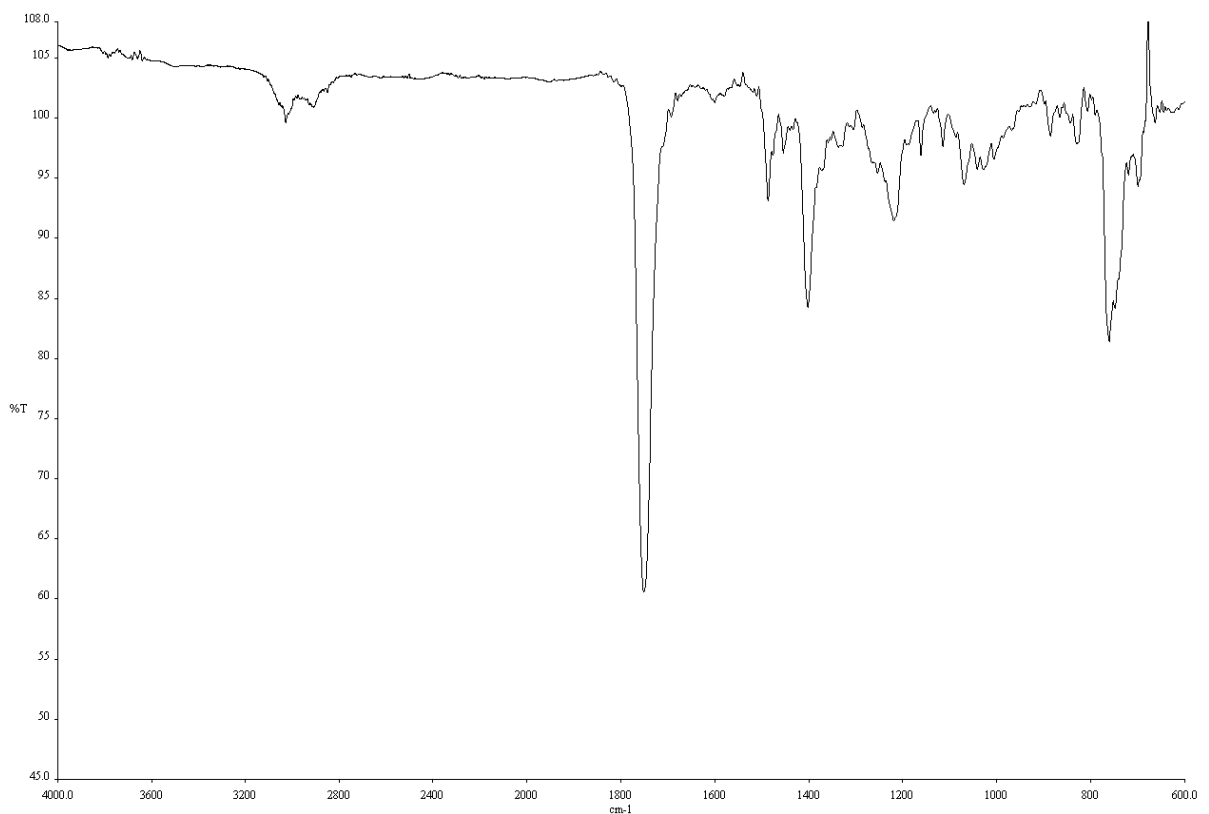

Infrared spectrum (Thin Film, NaCl) of **5g**.

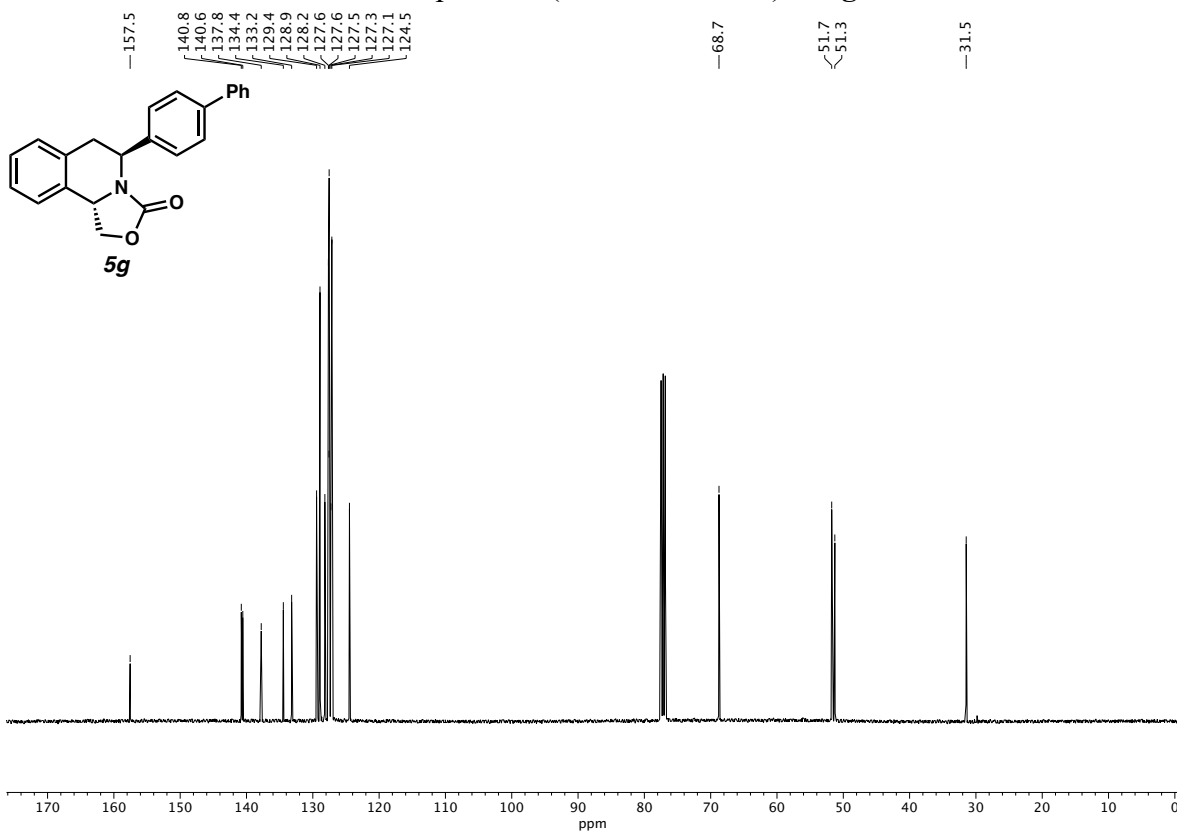

<sup>13</sup>C NMR (100 MHz, CDCl<sub>3</sub>) of **5g**.



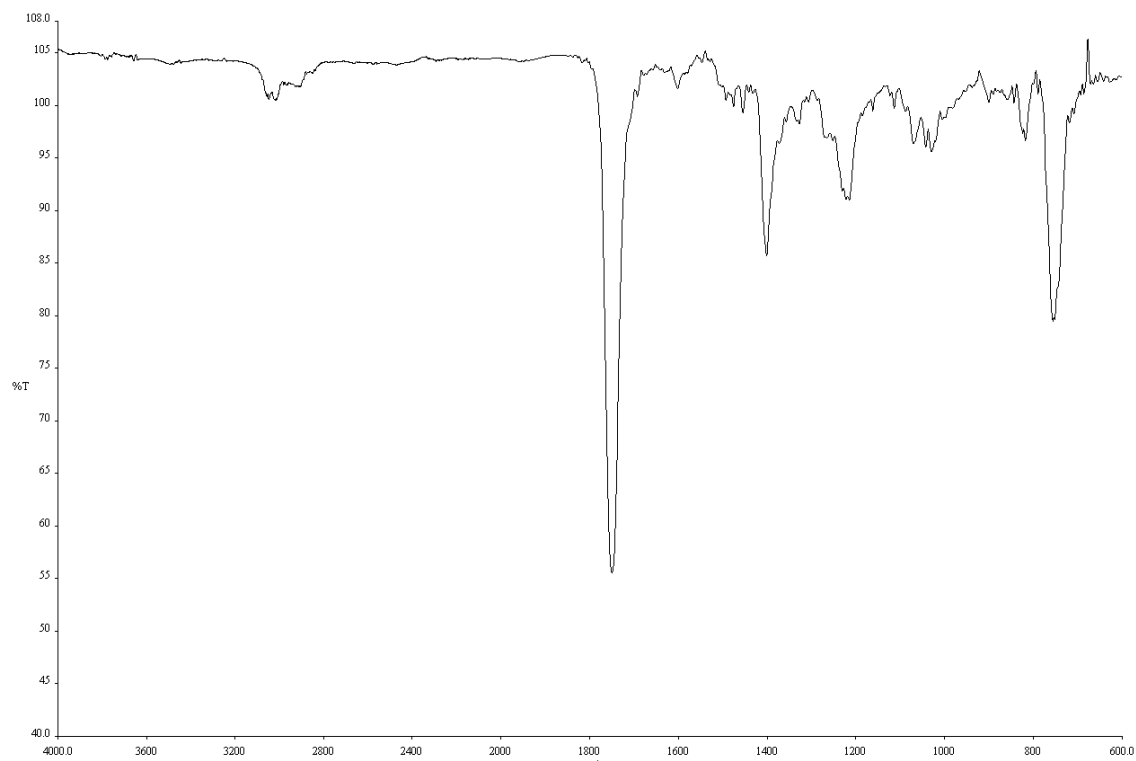

Infrared spectrum (Thin Film, NaCl) of **5h**.

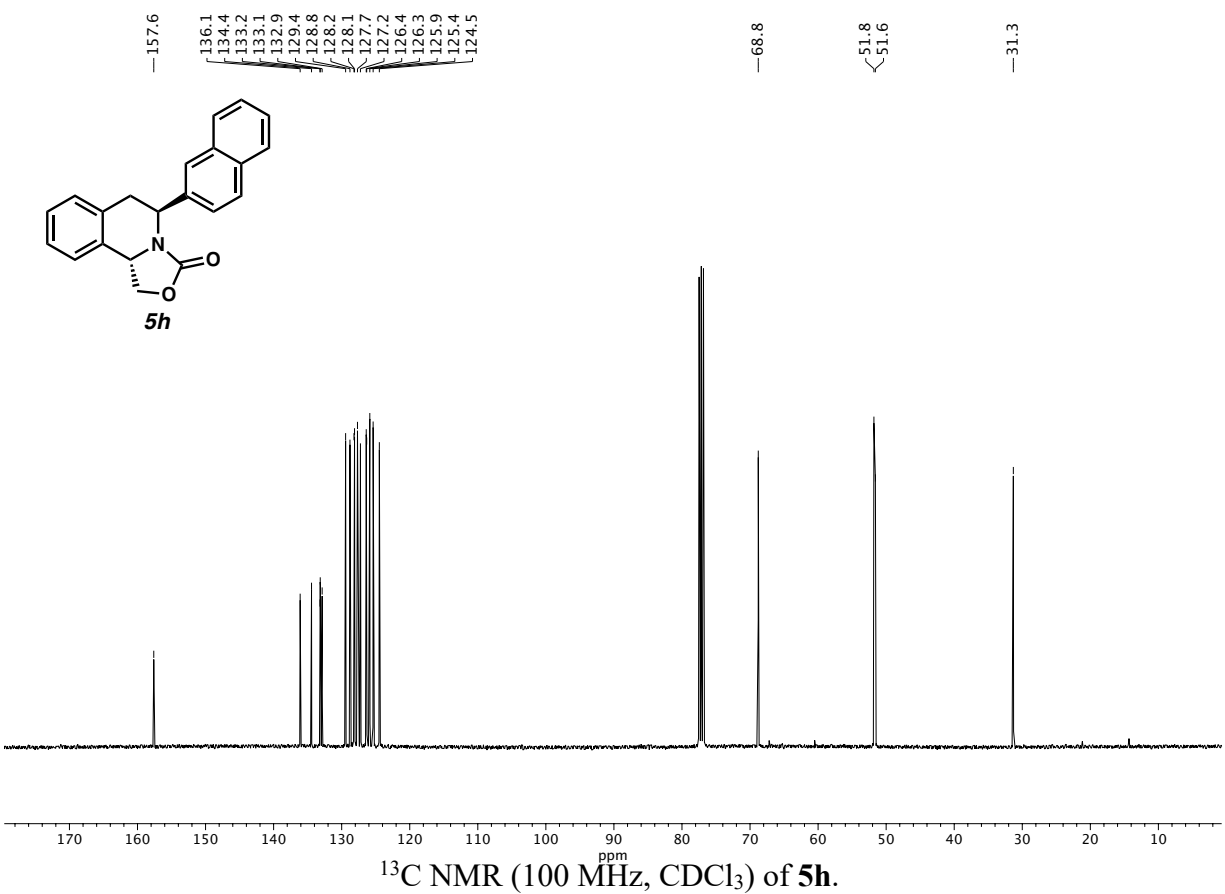

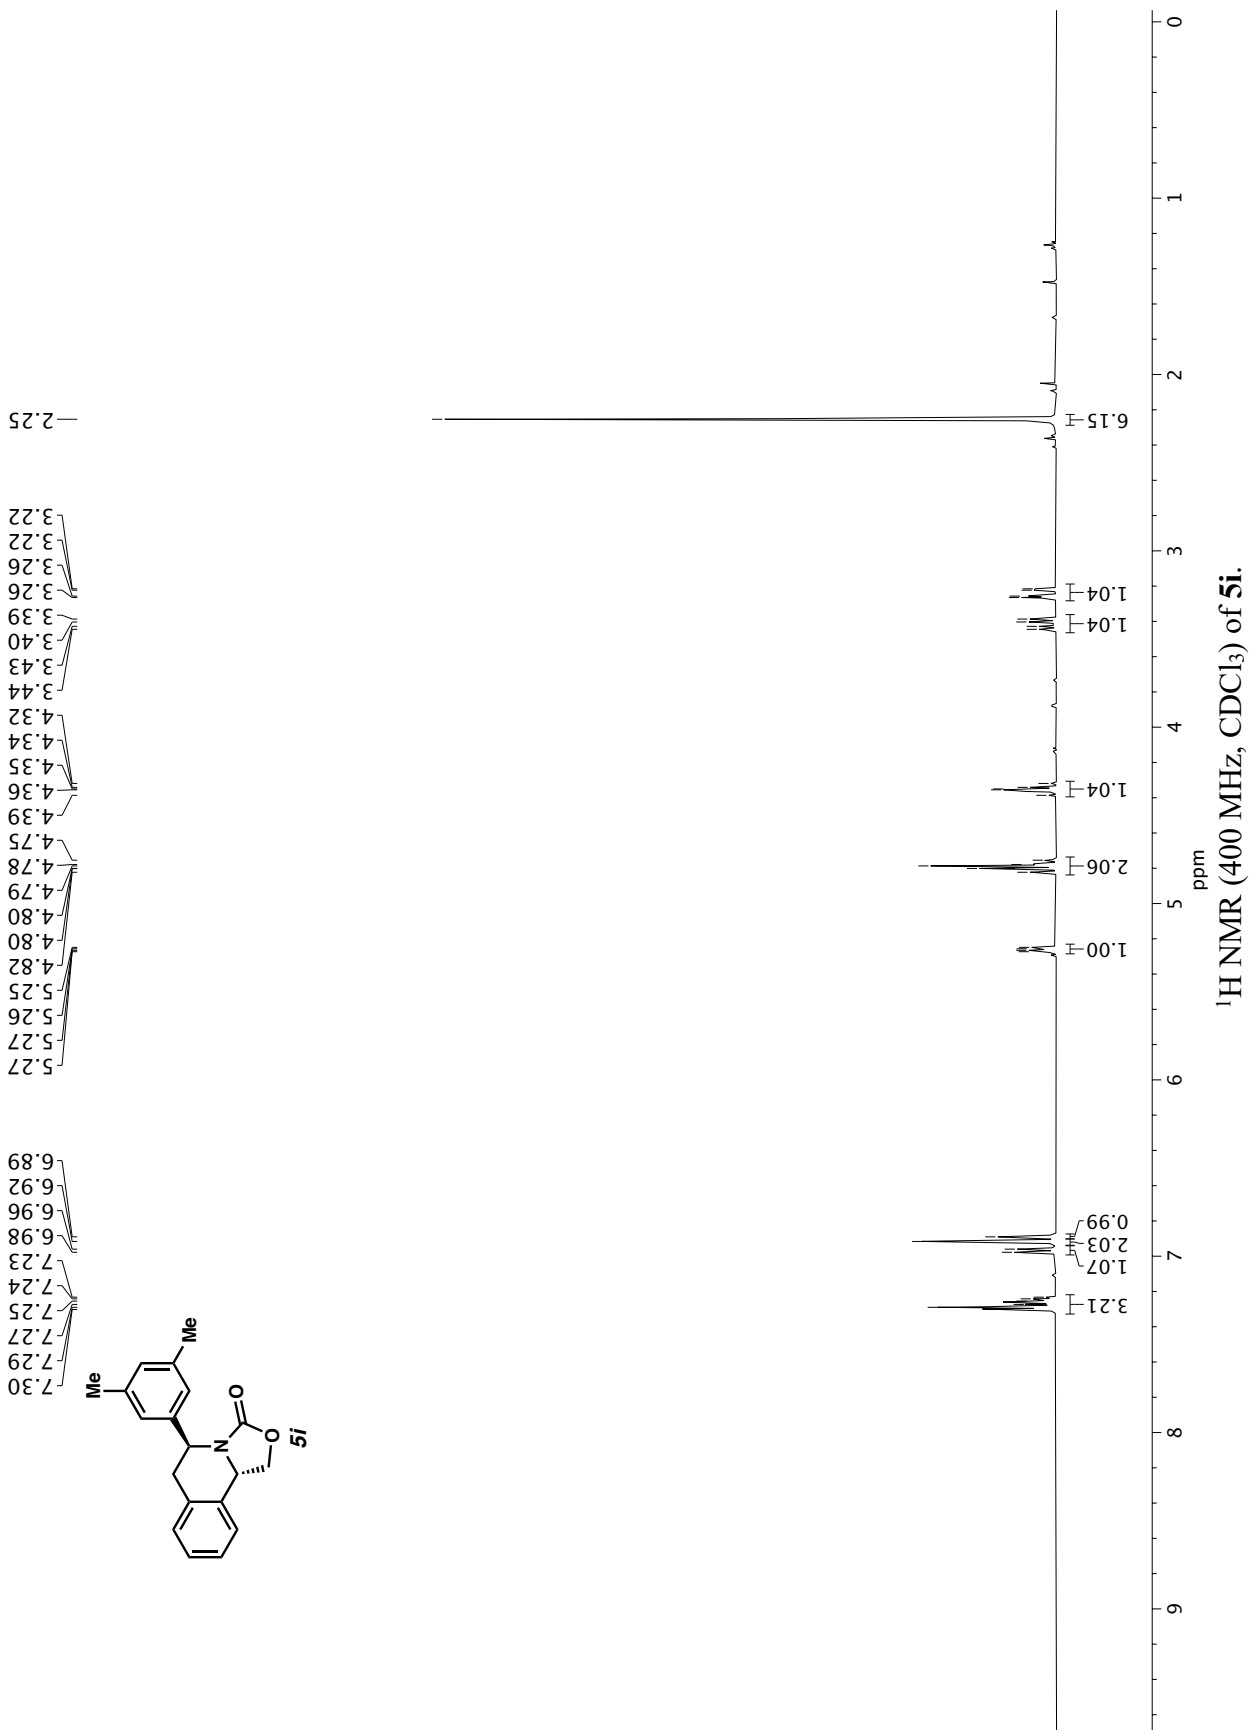

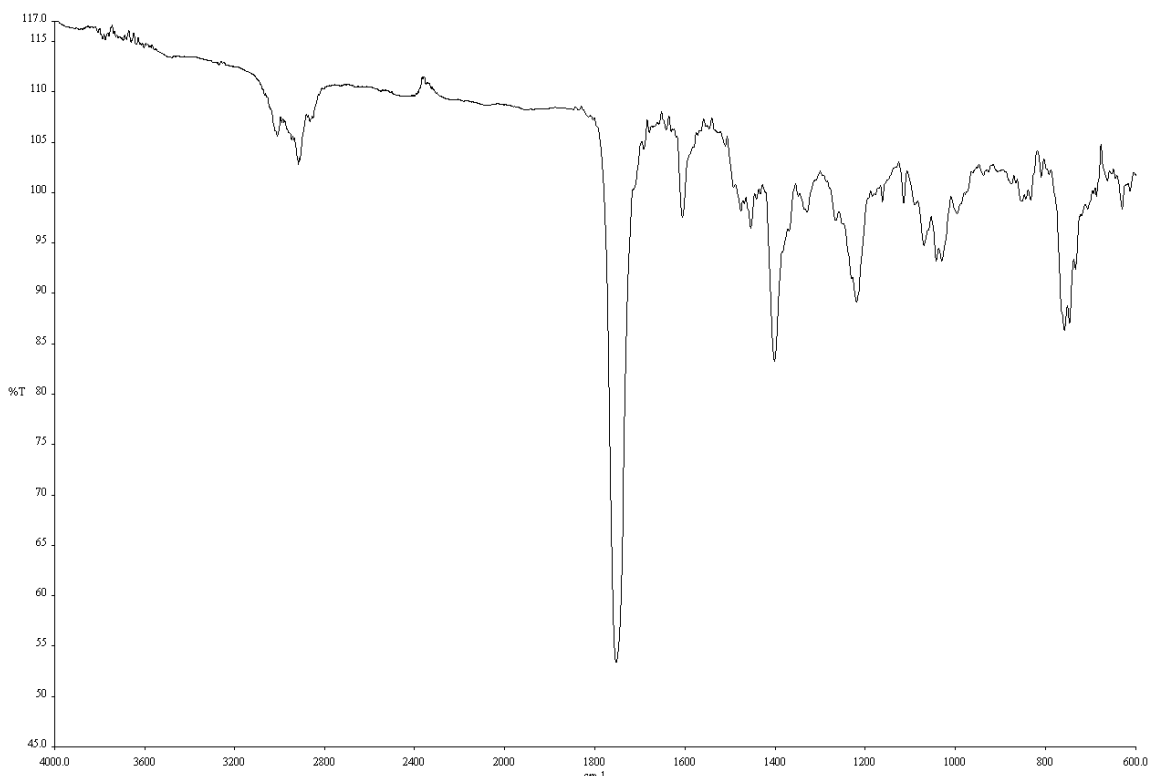

Infrared spectrum (Thin Film, NaCl) of **5i**.

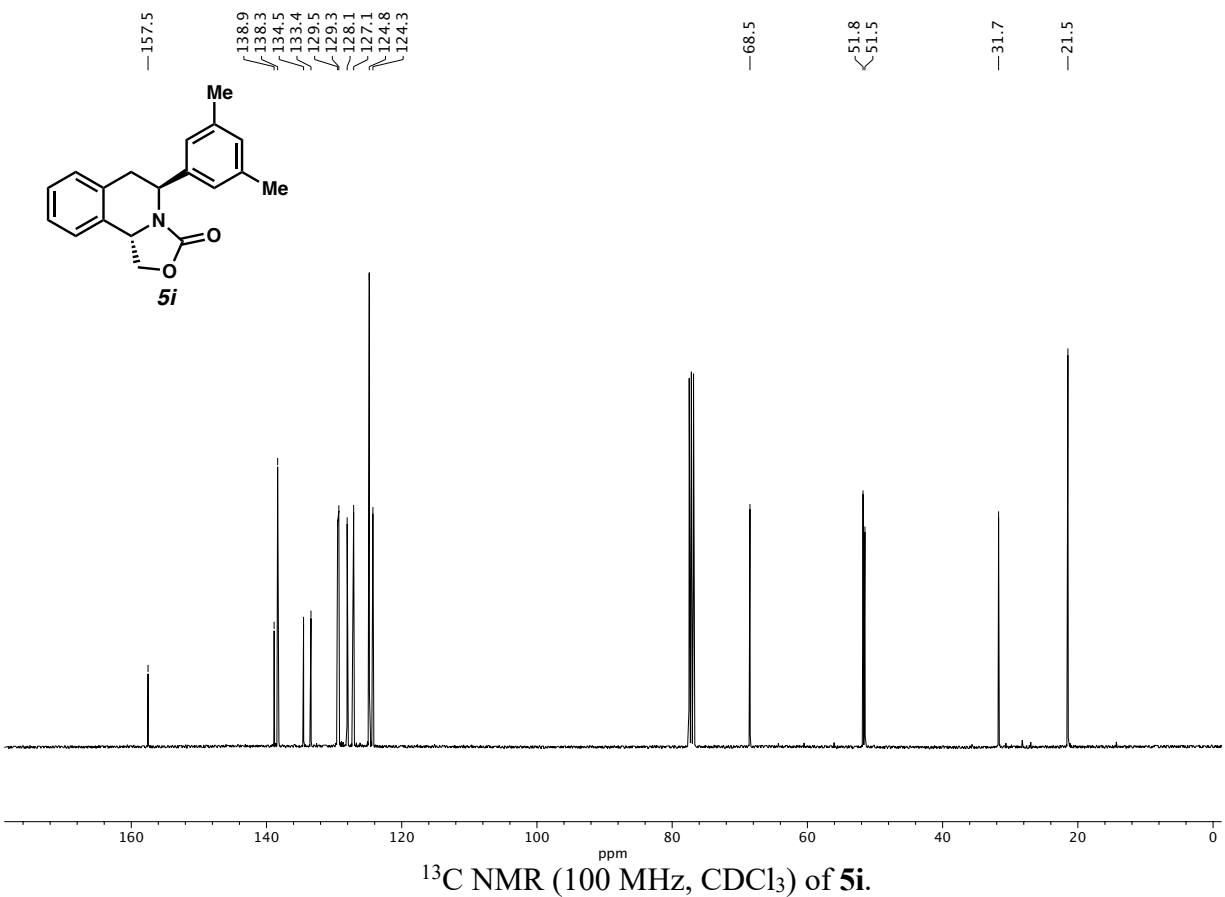

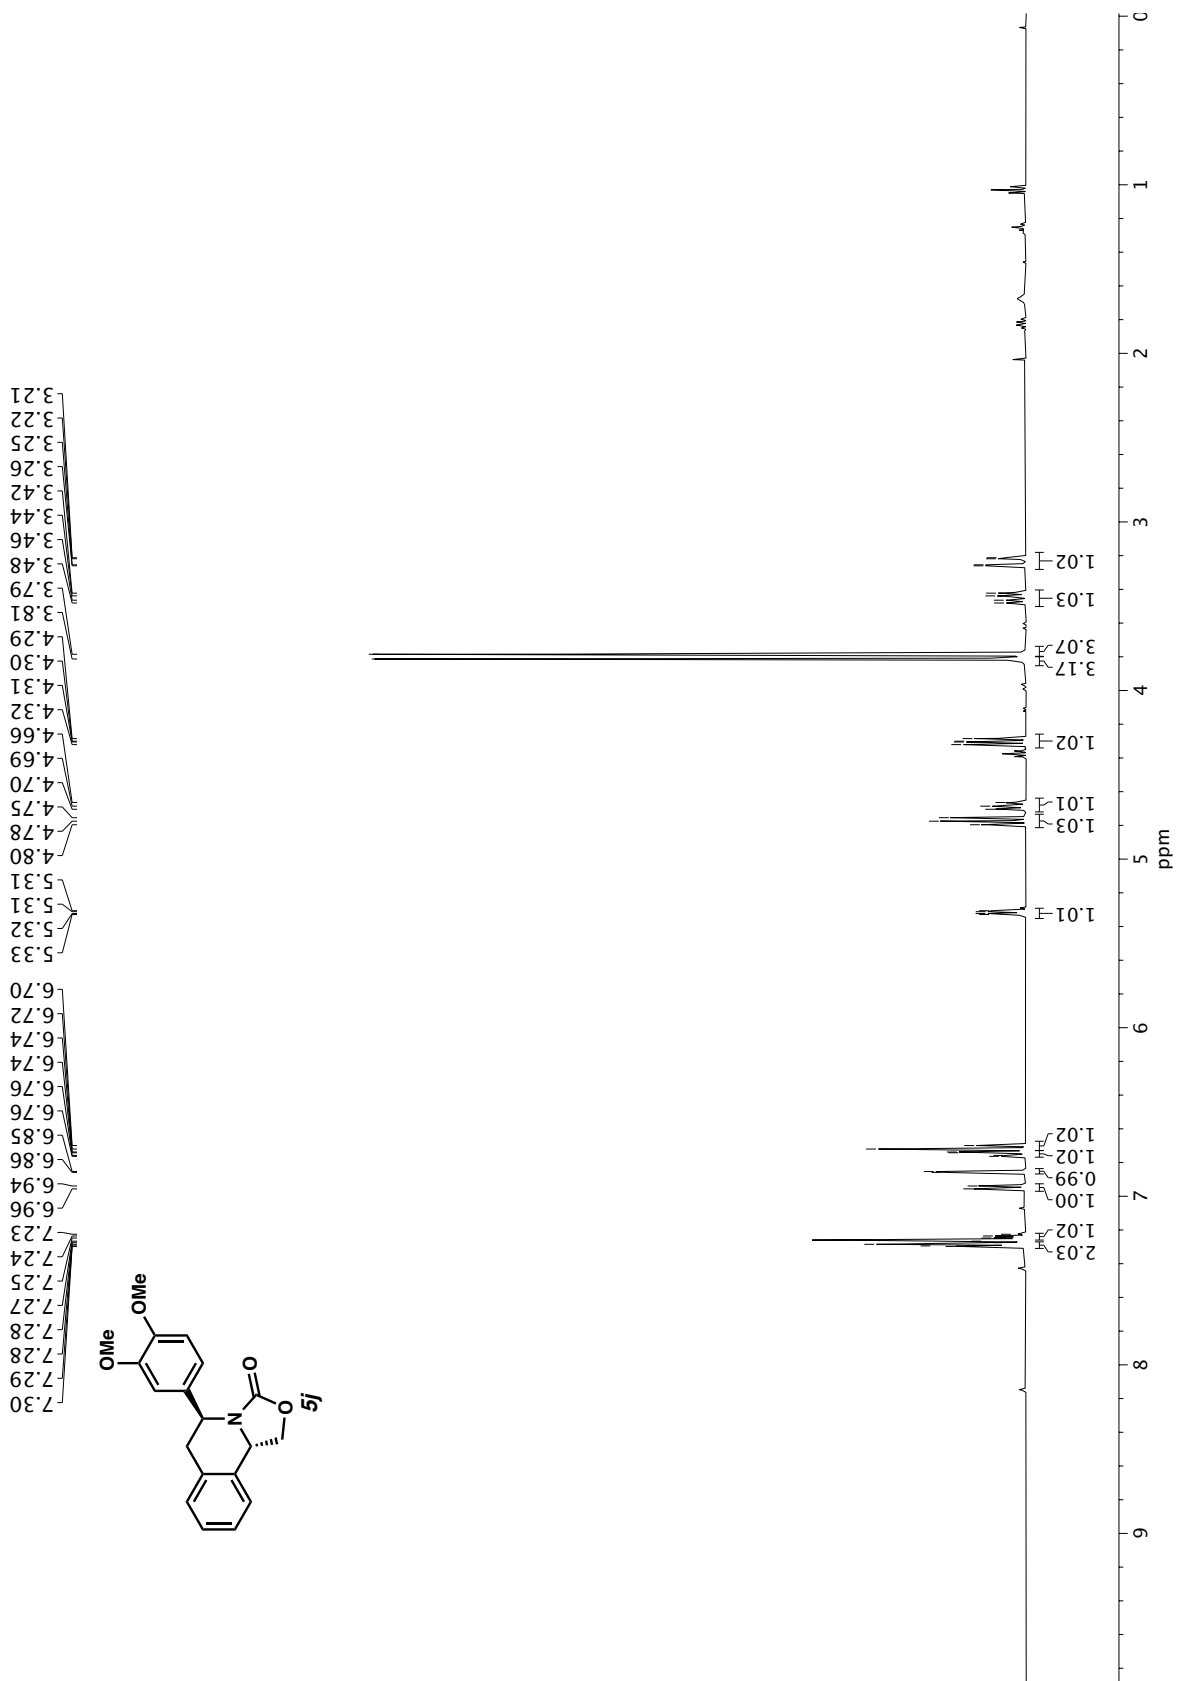

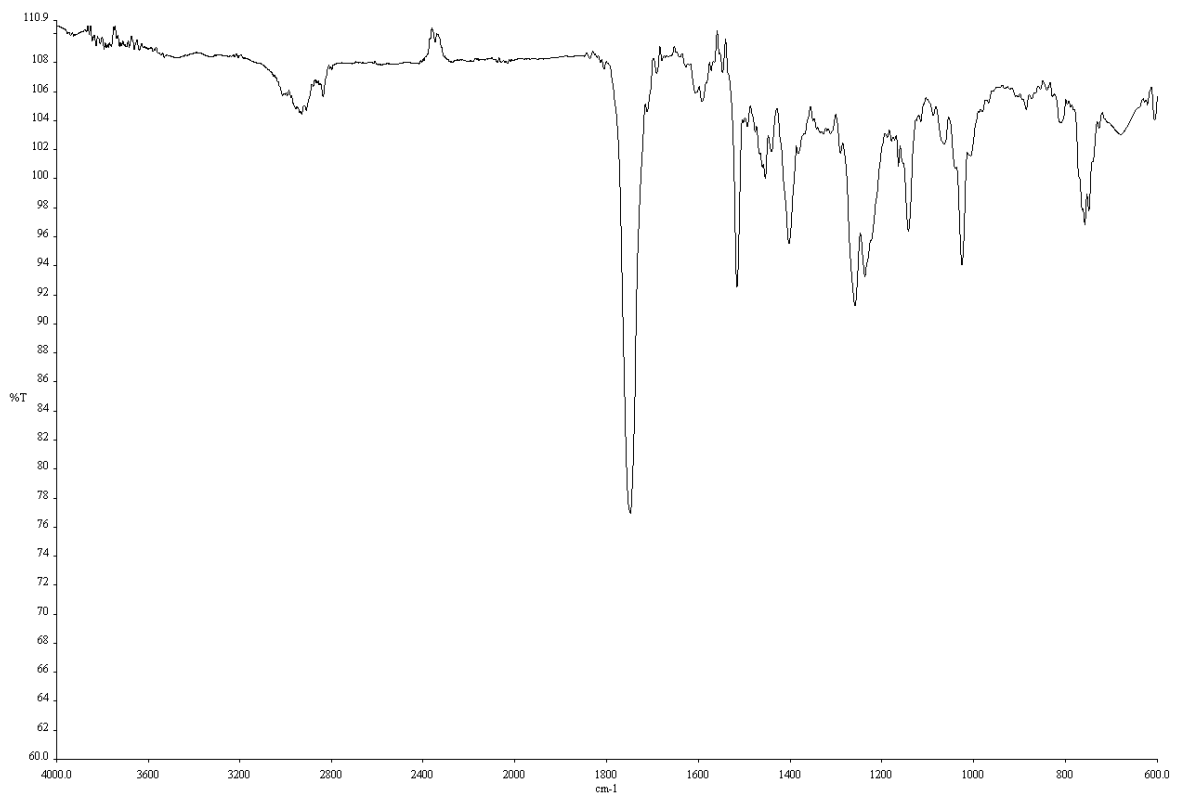

Infrared spectrum (Thin Film, NaCl) of **5j**.

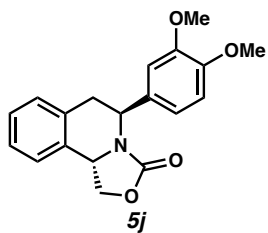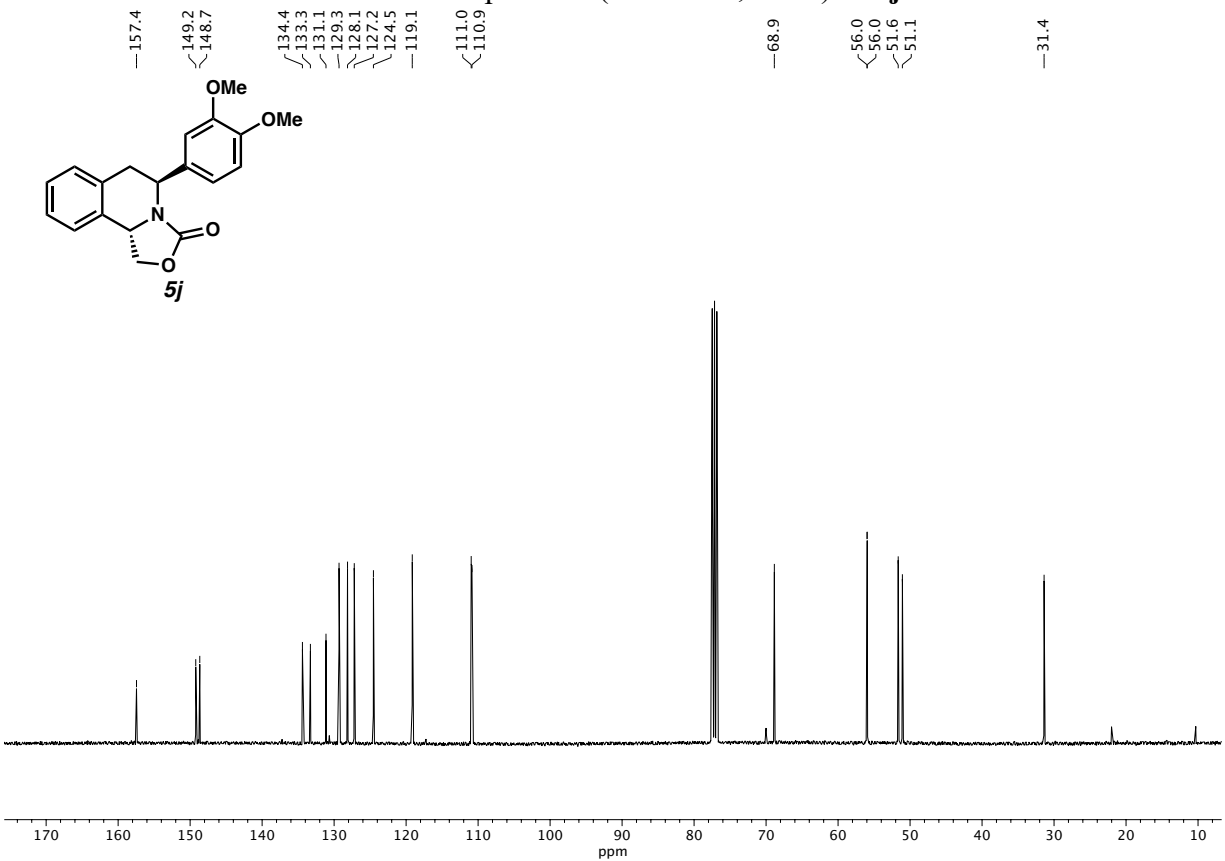

$^{13}\text{C}$  NMR (100 MHz,  $\text{CDCl}_3$ ) of **5j**.



3.00  
 3.01  
 3.05  
 3.05  
 3.39  
 3.40  
 3.43  
 3.45  
 3.78  
 4.23  
 4.26  
 4.29  
 4.74  
 4.76  
 4.77  
 5.33  
 5.33  
 5.34  
 5.35

6.94  
 6.94  
 6.96  
 7.01  
 7.02  
 7.03  
 7.14  
 7.17  
 7.21  
 7.21  
 7.24  
 7.25  
 7.27  
 7.28  
 7.30  
 7.31  
 7.32

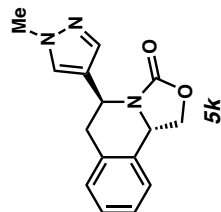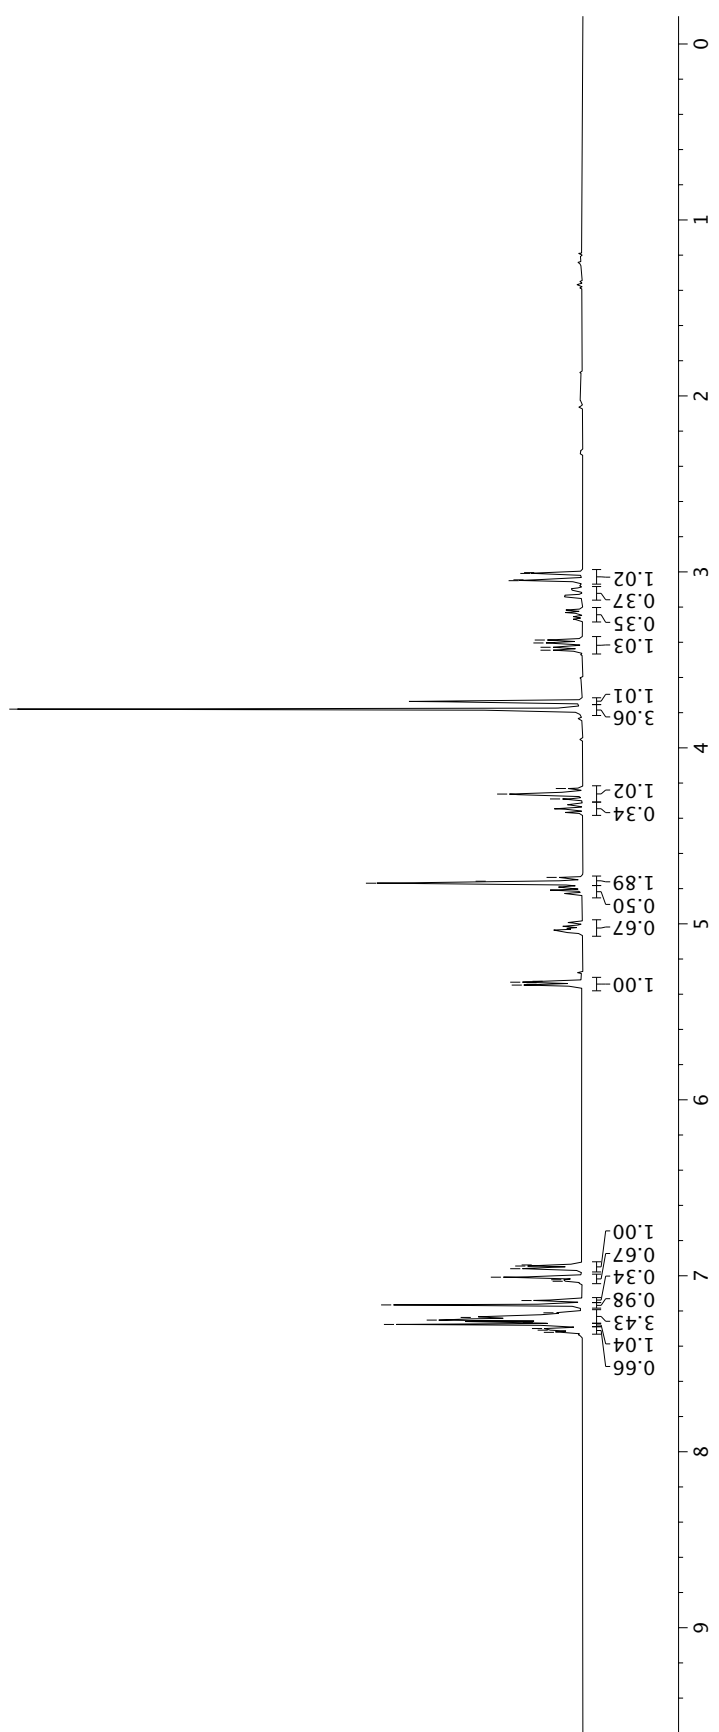

<sup>1</sup>H NMR (400 MHz, CDCl<sub>3</sub>) of **5k**.

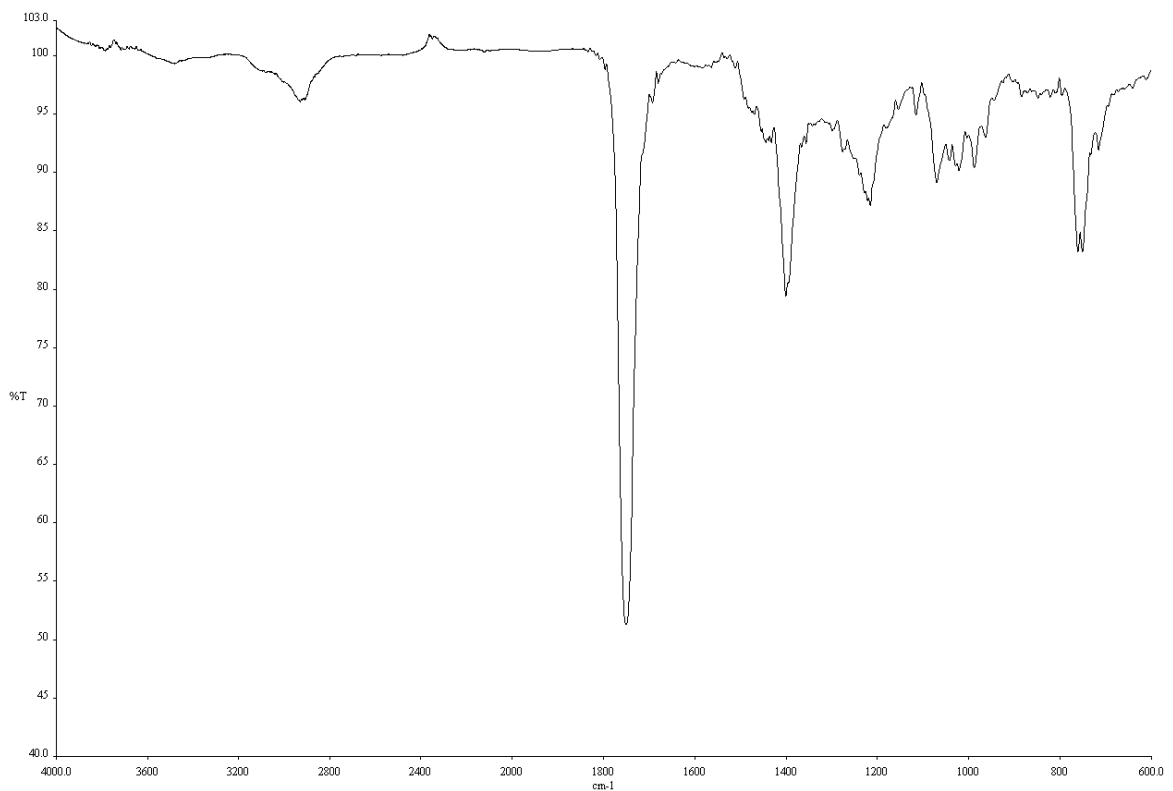

Infrared spectrum (Thin Film, NaCl) of **5k**.

-157.1  
 -138.1  
 -134.1  
 -132.8  
 -129.7  
 -128.8  
 -128.0  
 -127.3  
 -124.7  
 -119.7  
 -69.1  
 -51.5  
 -44.2  
 -39.1  
 -32.3

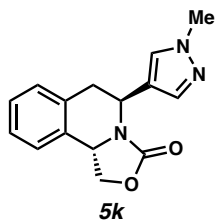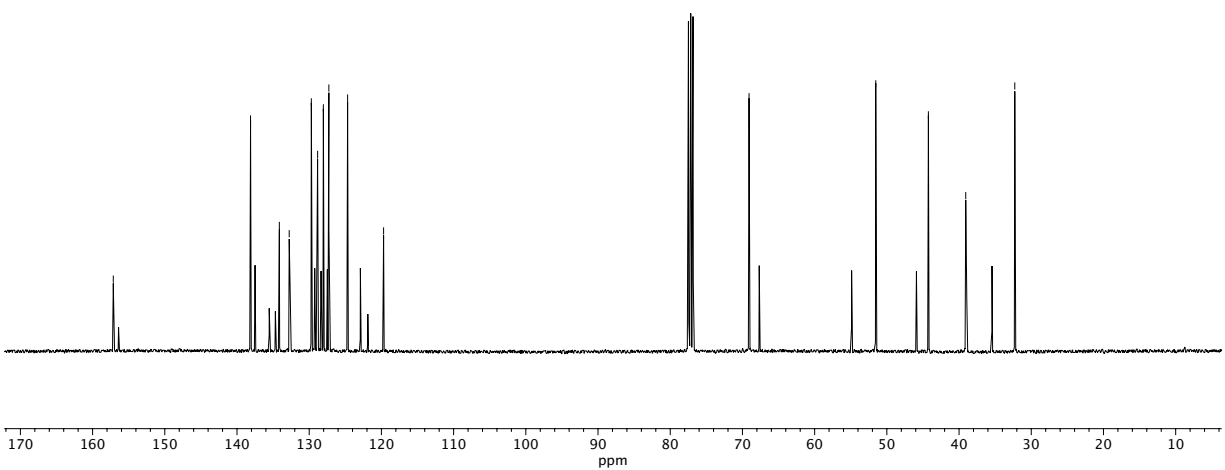

$^{13}\text{C}$  NMR (100 MHz,  $\text{CDCl}_3$ ) of **5k**.

8.04  
8.03  
7.56  
7.55  
7.53  
7.53  
7.29  
7.28  
7.27  
7.27  
7.25  
7.24  
7.23  
6.96  
6.96  
6.95  
6.94  
6.69  
6.67  
5.32  
5.31  
5.30  
5.30  
4.80  
4.78  
4.76  
4.71  
4.69  
4.69  
4.67  
4.33  
4.32  
4.31  
4.30  
3.86  
3.48  
3.46  
3.44  
3.42  
3.23  
3.22  
3.19  
3.18

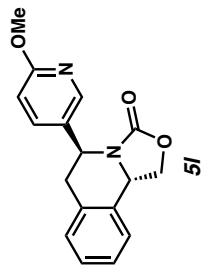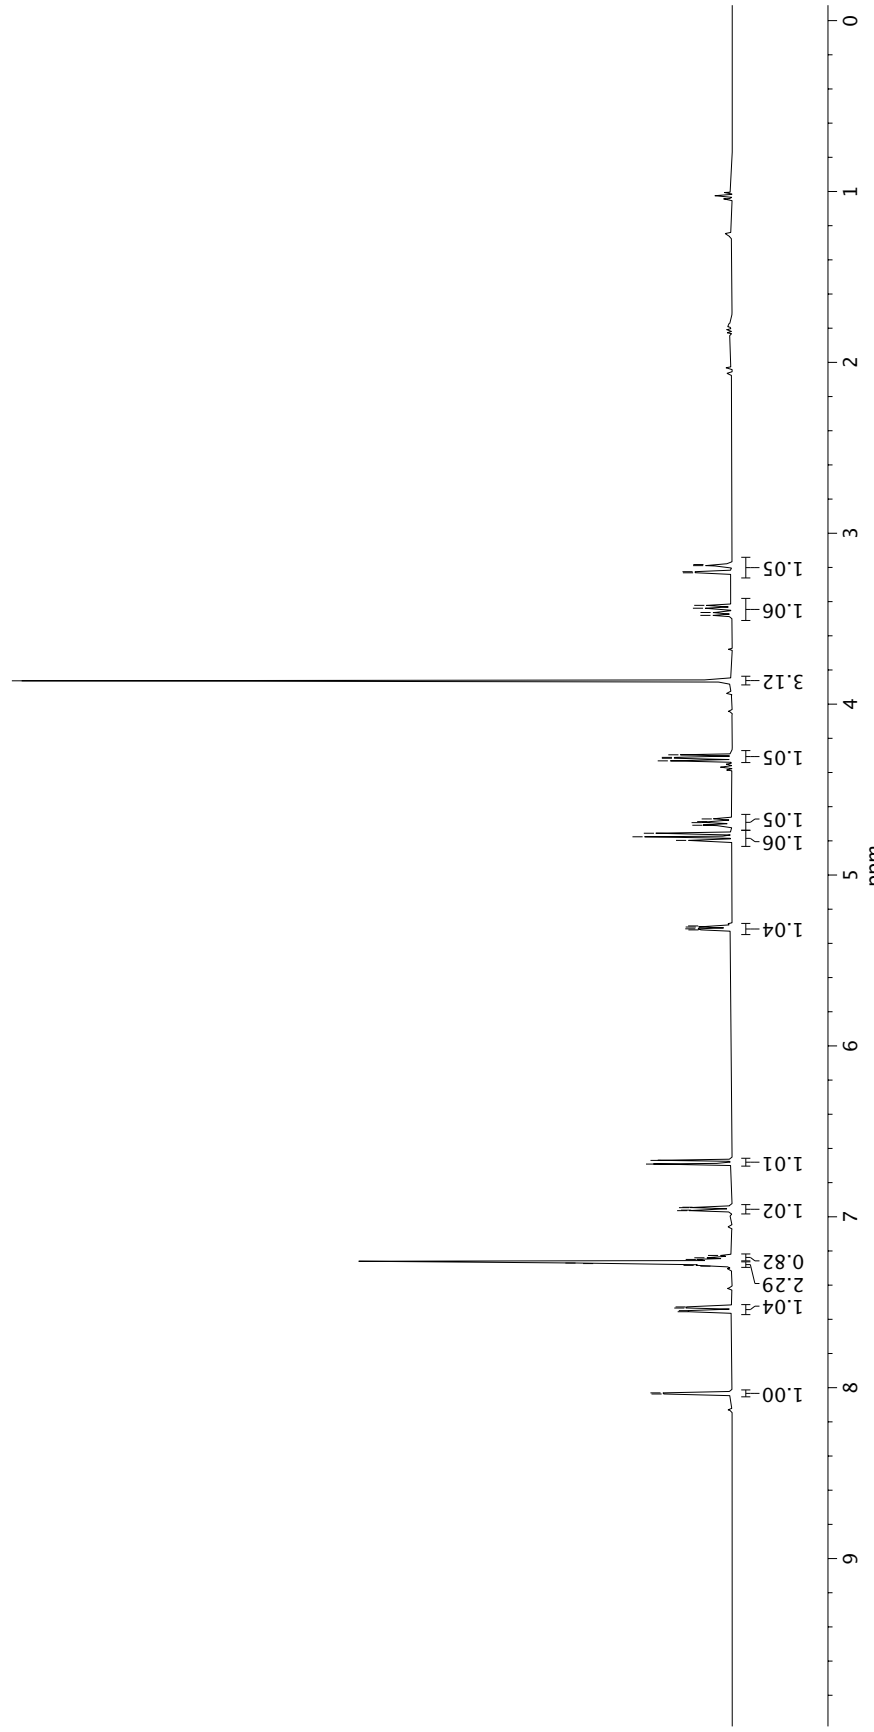

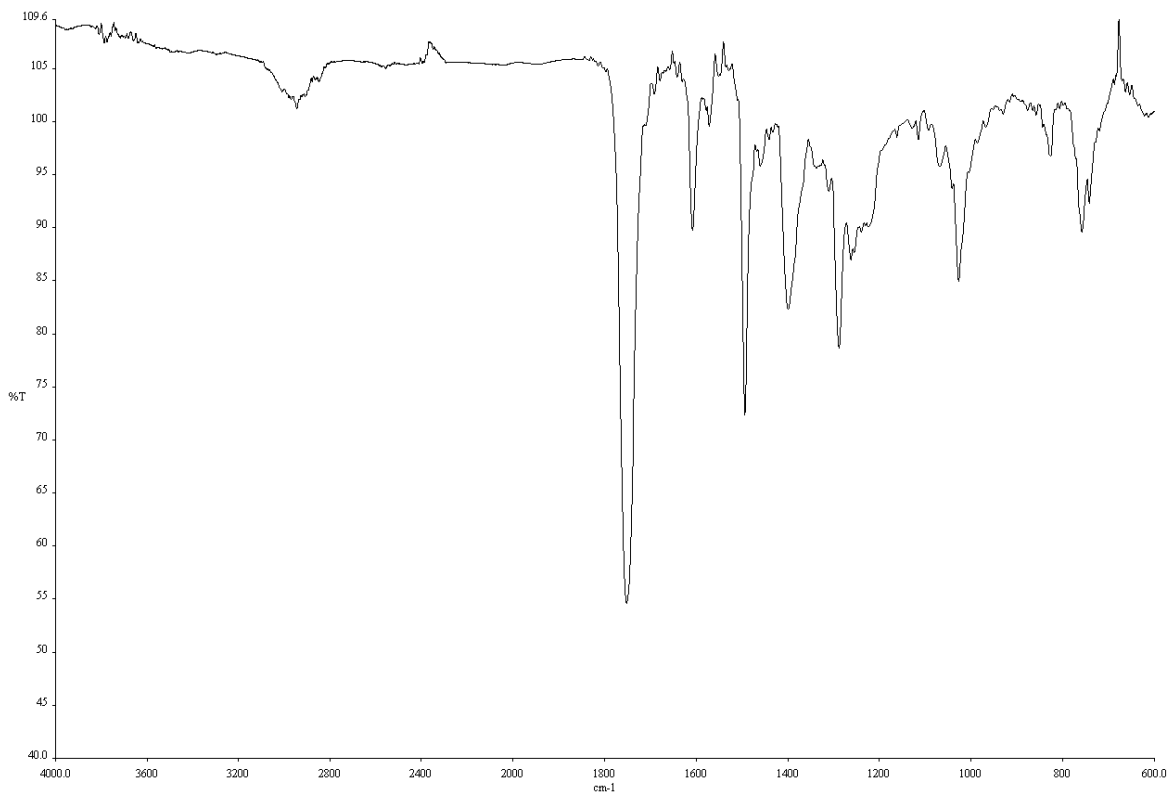

Infrared spectrum (Thin Film, NaCl) of **5I**.

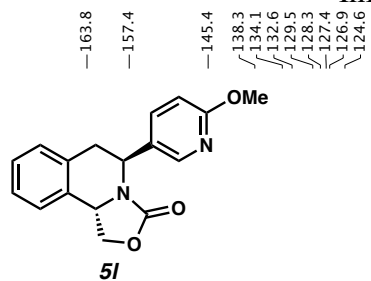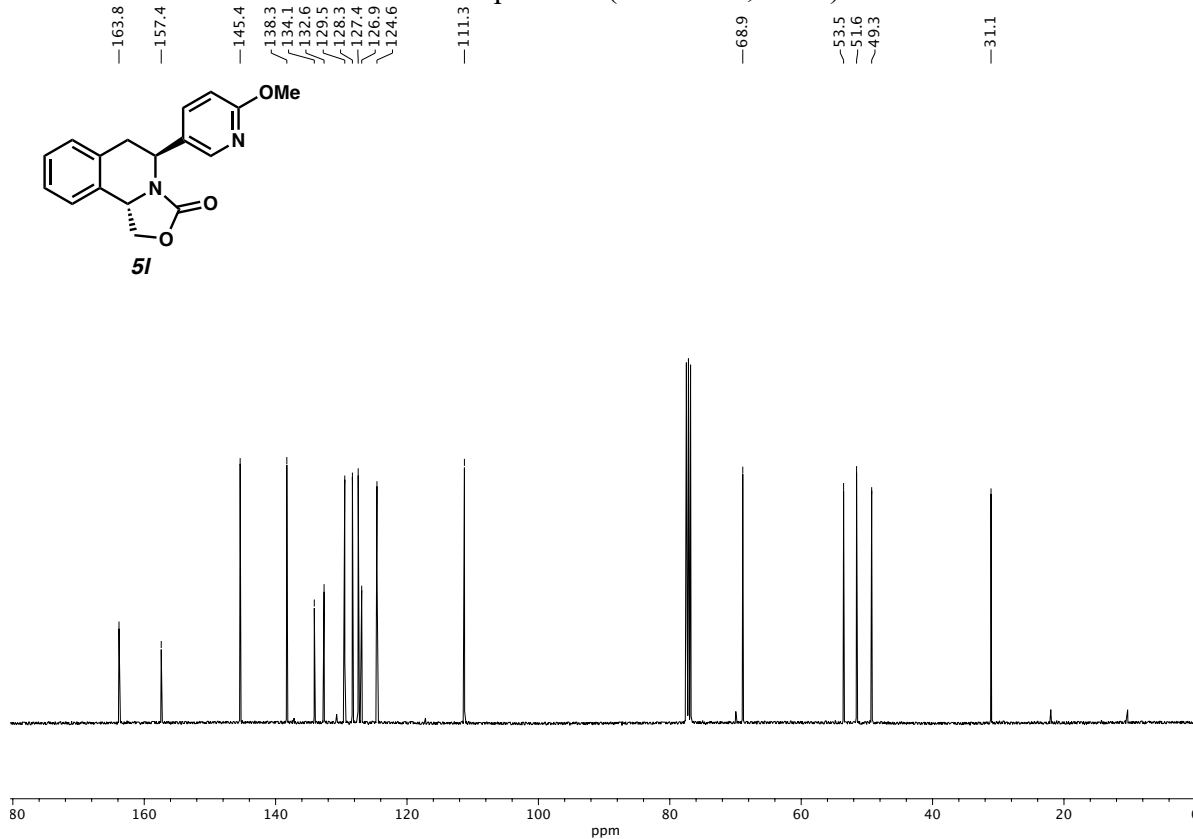

$^{13}\text{C}$  NMR (100 MHz,  $\text{CDCl}_3$ ) of **5I**.

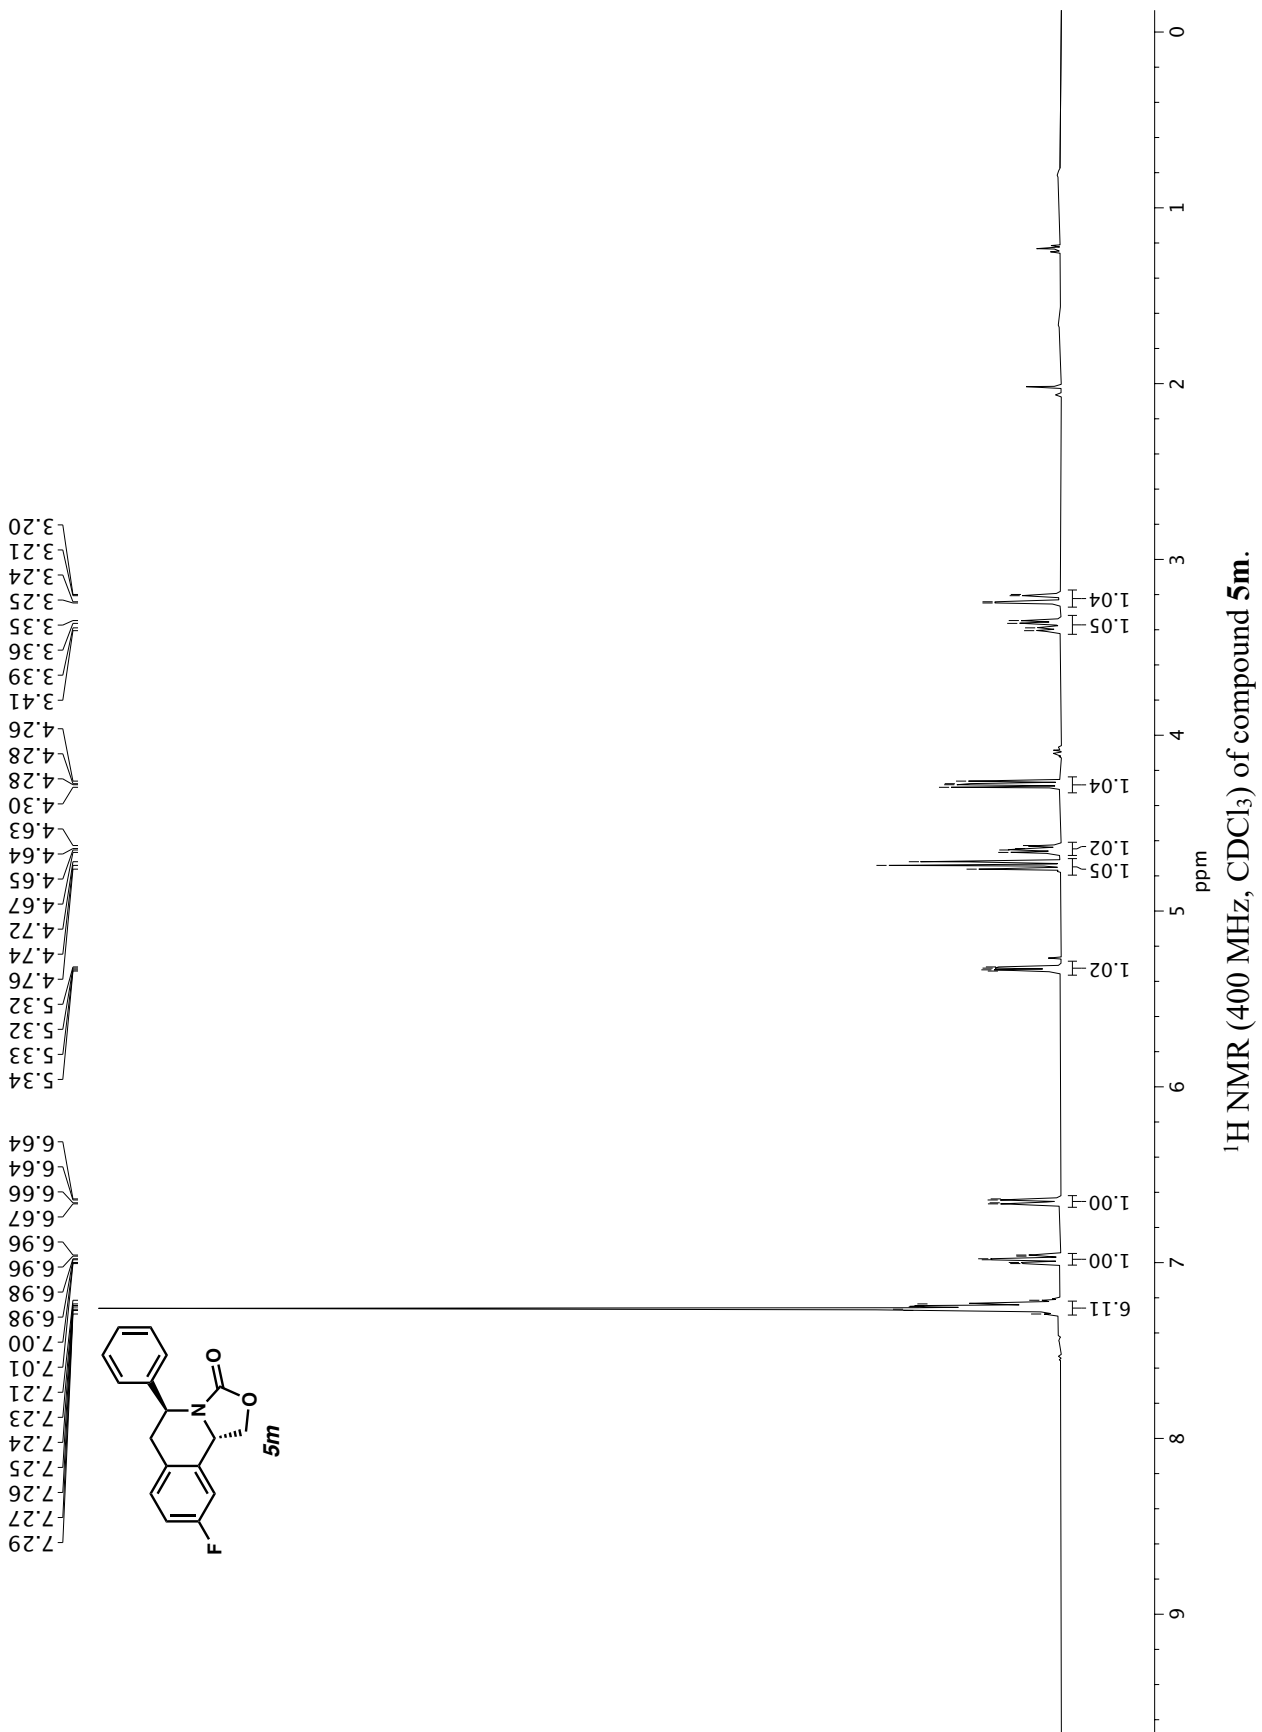

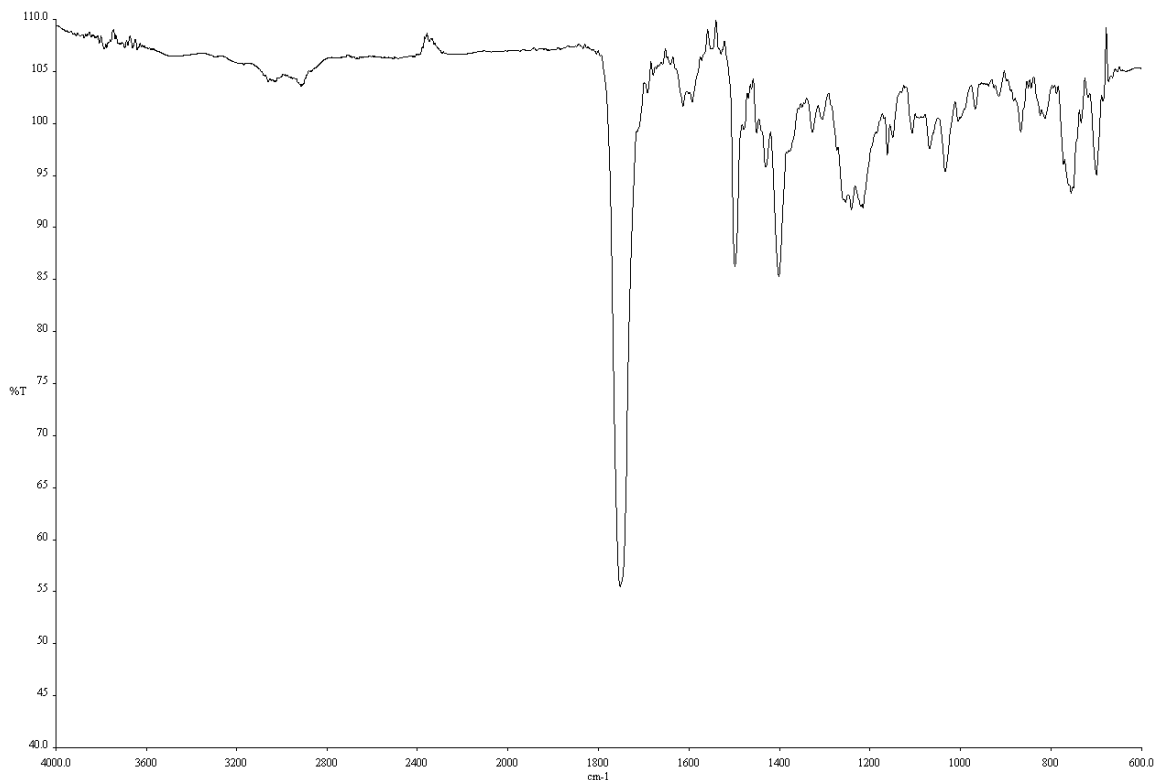

Infrared spectrum (Thin Film, NaCl) of **5m**.

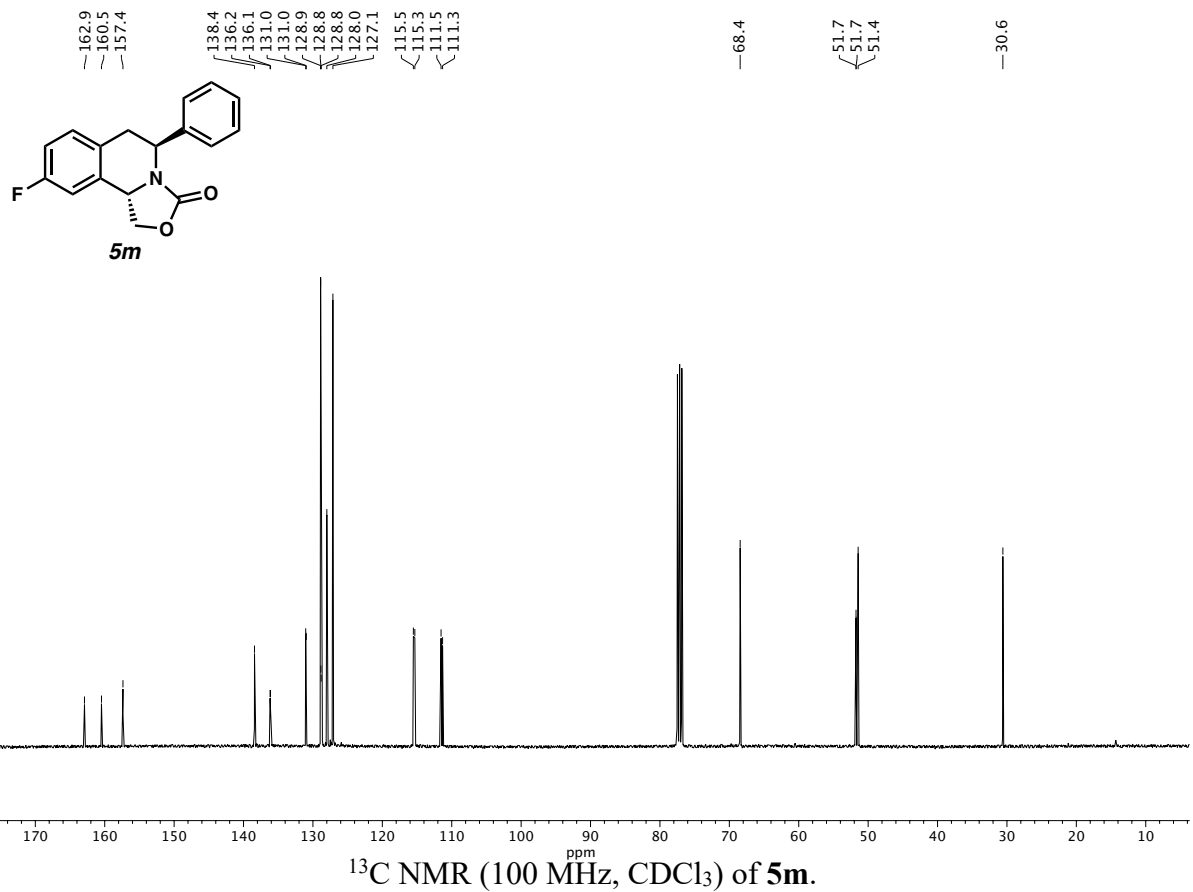

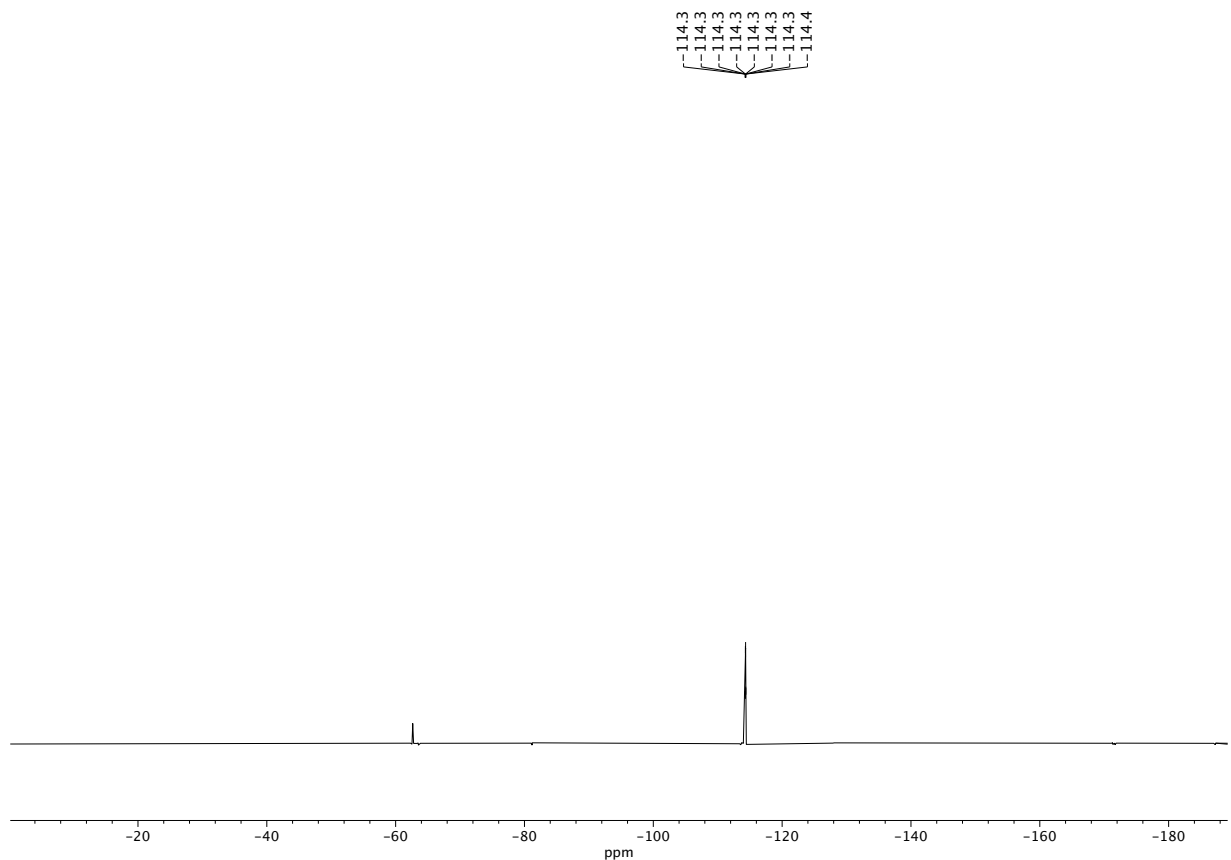

$^{19}\text{F}$  NMR (282 MHz,  $\text{CDCl}_3$ ) of **5m**.

7.57  
7.55  
7.44  
7.42  
7.30  
7.29  
7.28  
7.27  
7.27  
7.05  
7.04  
7.03  
7.02  
7.00  
7.00  
6.72  
6.72  
6.70  
6.70  
5.36  
5.35  
5.34  
5.33  
4.82  
4.80  
4.78  
4.71  
4.69  
4.69  
4.67  
4.37  
4.36  
4.35  
4.34  
3.45  
3.43  
3.41  
3.39  
3.25  
3.24  
3.21  
3.20

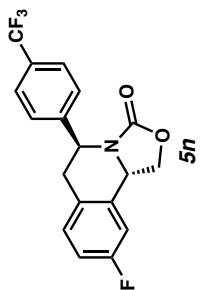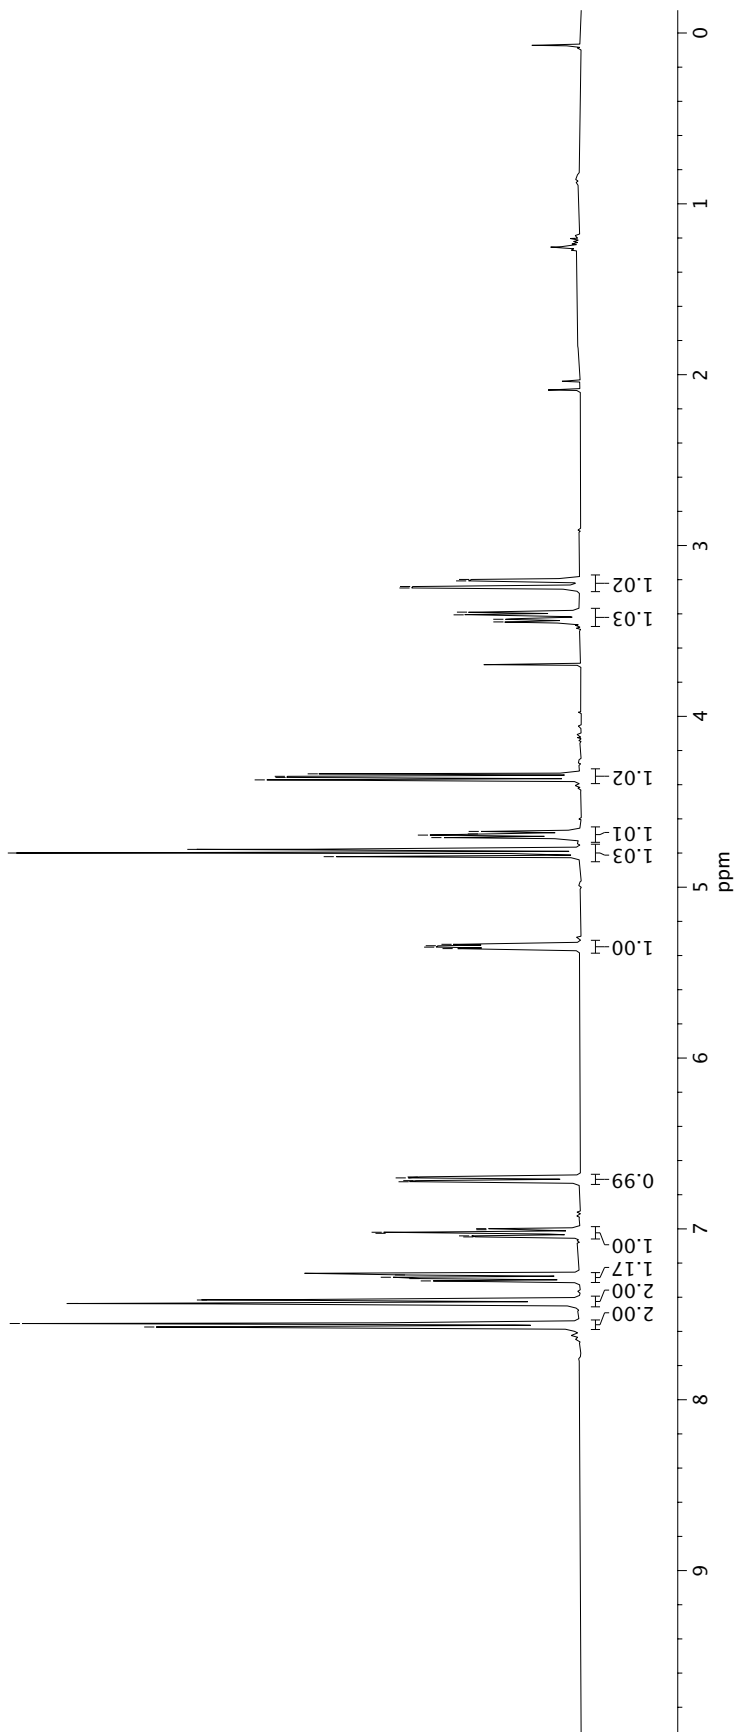

<sup>1</sup>H NMR (400 MHz, CDCl<sub>3</sub>) of compound **5n**.



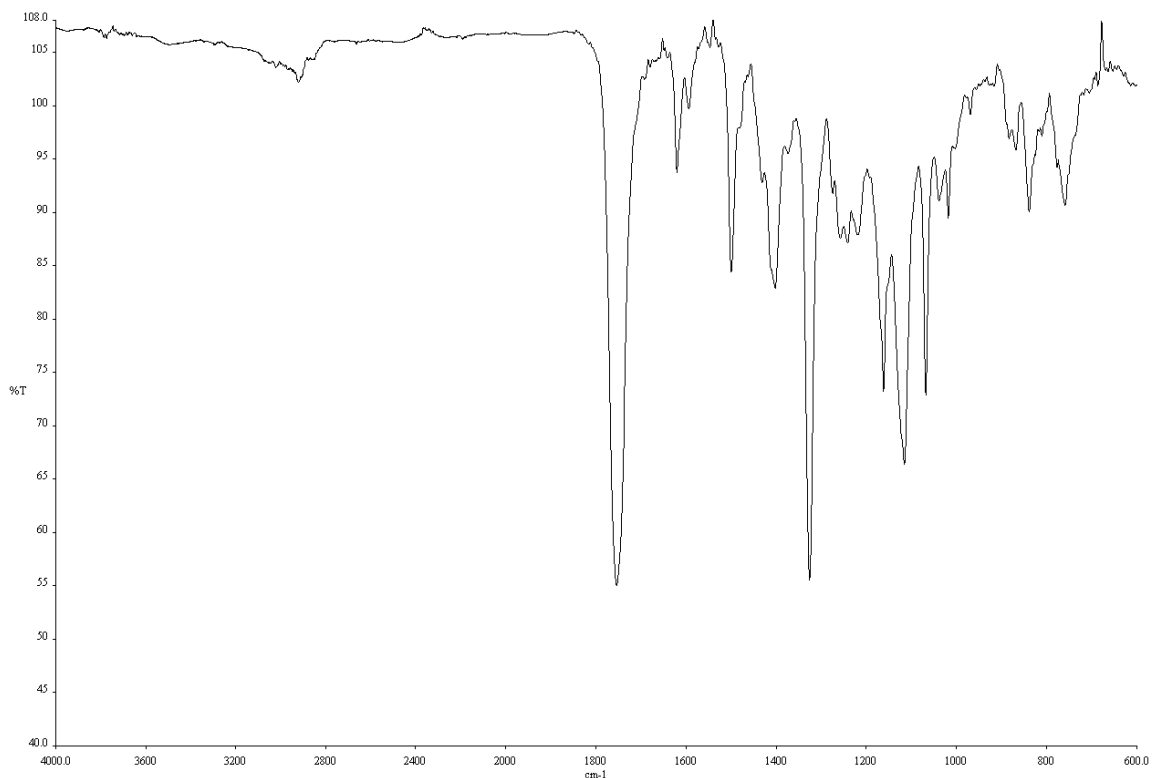

Infrared spectrum (Thin Film, NaCl) of **5n**.

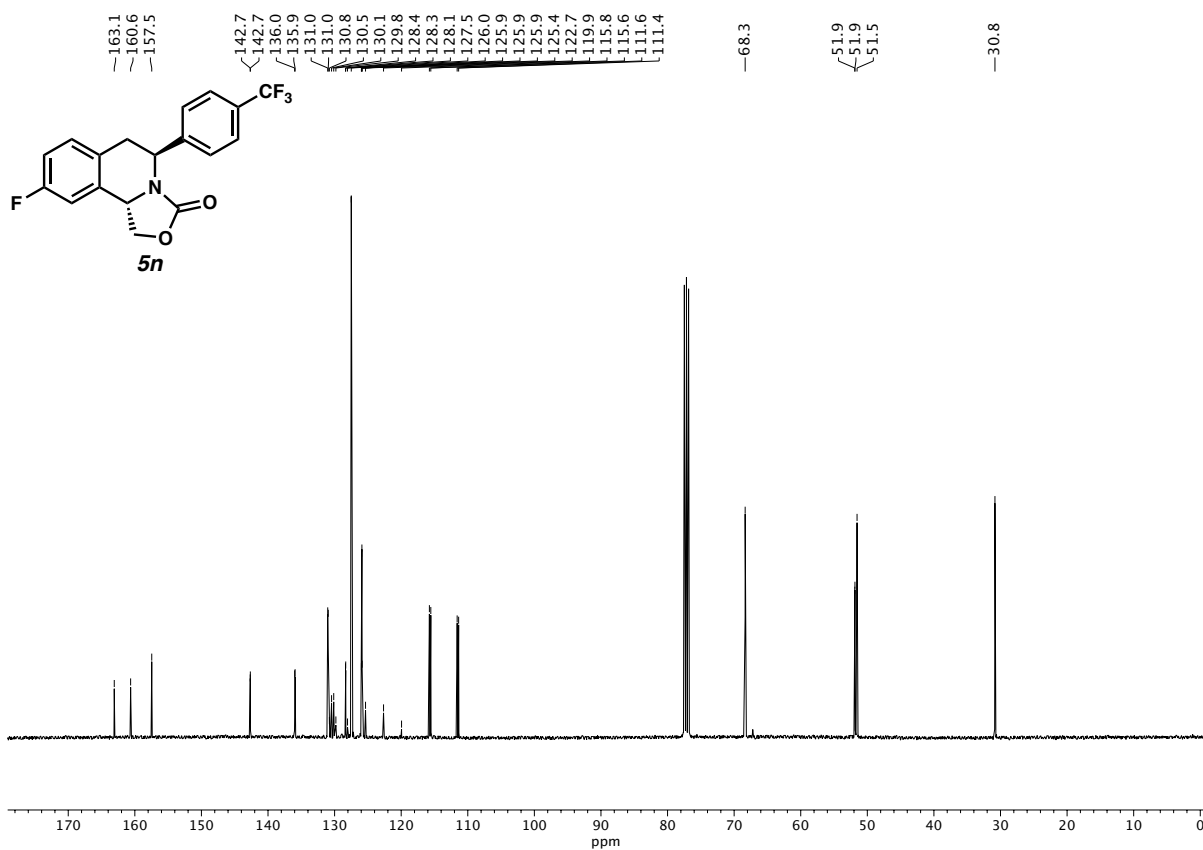

<sup>13</sup>C NMR (100 MHz, CDCl<sub>3</sub>) of **5n**.

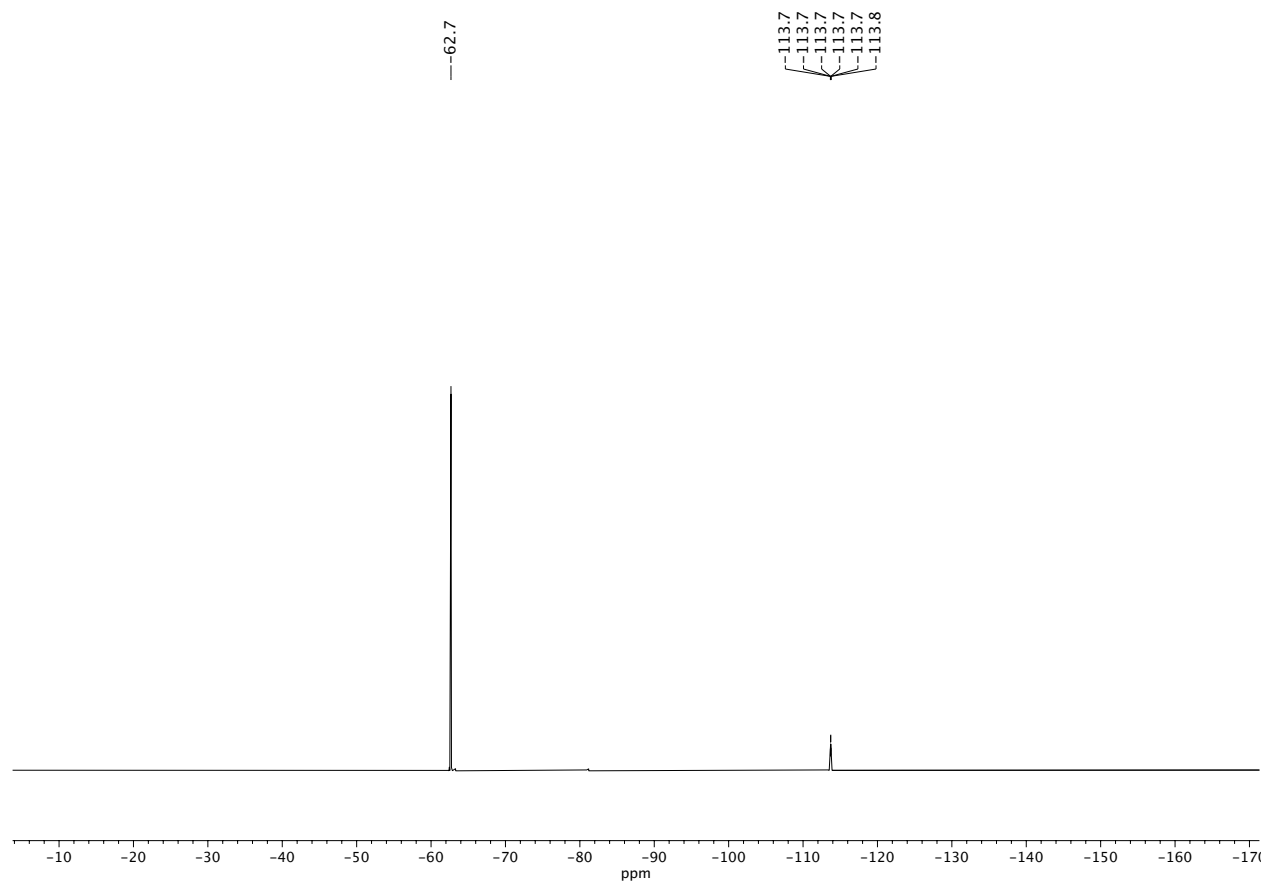

$^{19}\text{F}$  NMR (282 MHz,  $\text{CDCl}_3$ ) of **5n**.

7.47  
7.46  
7.44  
7.42  
7.41  
7.40  
7.38  
7.33  
7.33  
7.32  
7.31  
7.29  
7.29  
7.22  
7.21  
7.20  
7.19  
7.18  
7.17  
7.16  
7.15  
7.14  
7.13  
4.25  
4.24  
4.23  
4.21  
4.17  
4.16  
4.15  
4.14  
3.82  
3.81  
3.80  
3.78  
3.74  
3.71  
3.68  
3.10  
3.09  
3.06  
3.05  
2.98  
2.95  
2.94  
2.91

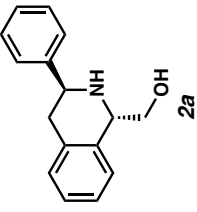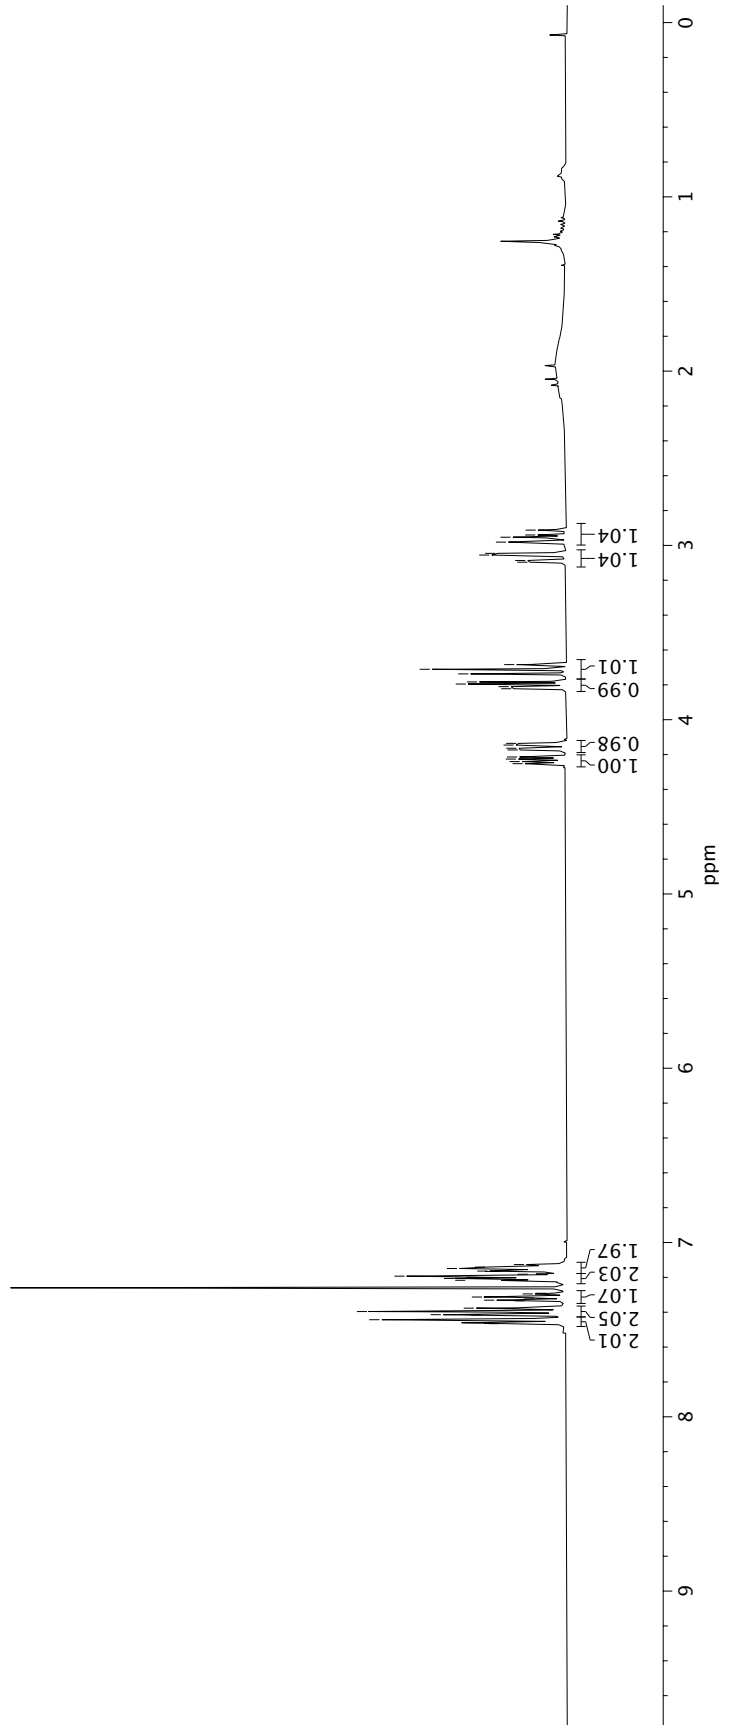

<sup>1</sup>H NMR (400 MHz, CDCl<sub>3</sub>) of compound **2a**.

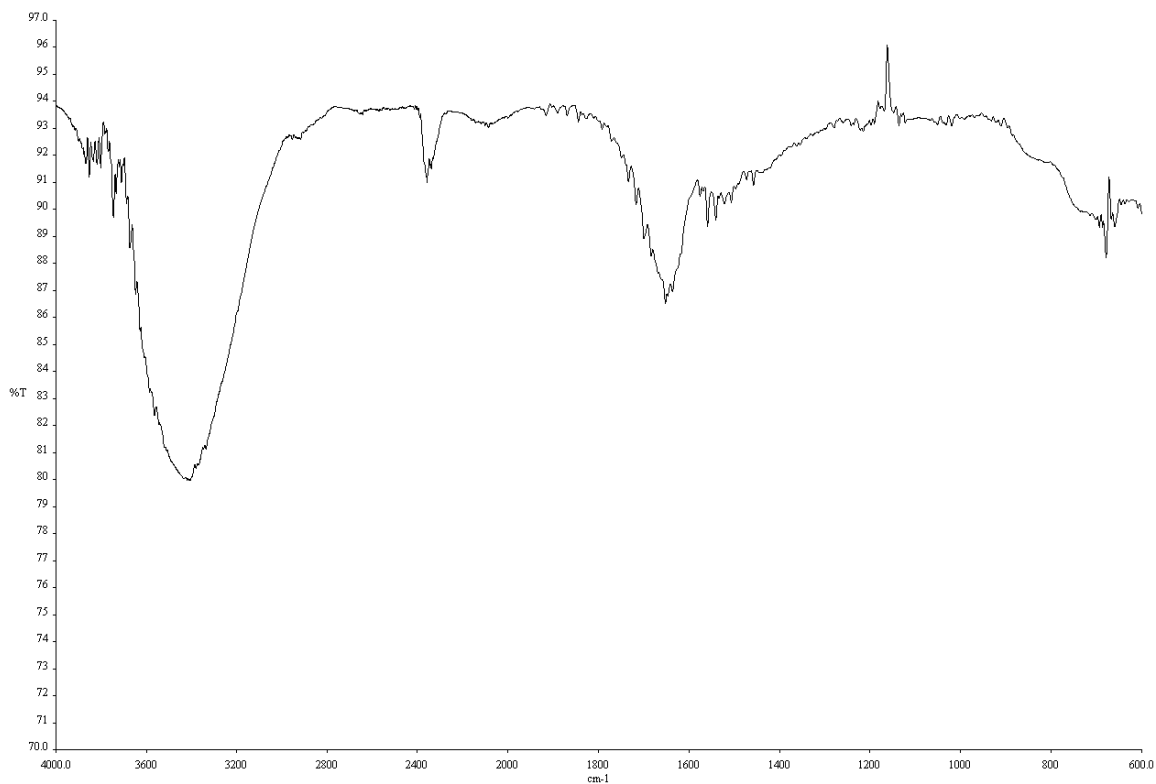

Infrared spectrum (Thin Film, NaCl) of **2a**.

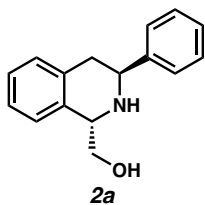

— 143.5  
 > 135.5  
 > 134.7  
 > 129.5  
 > 128.8  
 > 127.5  
 > 127.0  
 > 126.7  
 > 126.6  
 > 126.4  
 — 63.8  
 — 57.4  
 — 50.7  
 — 36.8

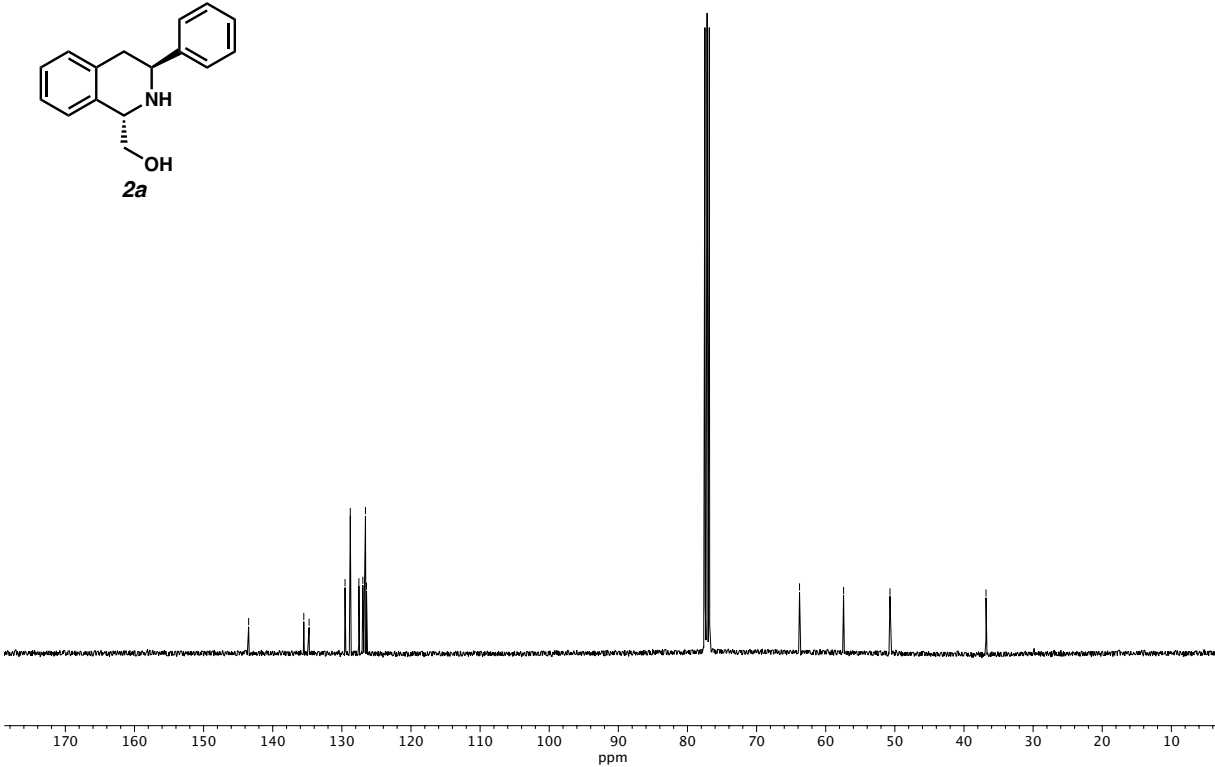

$^{13}\text{C}$  NMR (100 MHz,  $\text{CDCl}_3$ ) of **2a**.

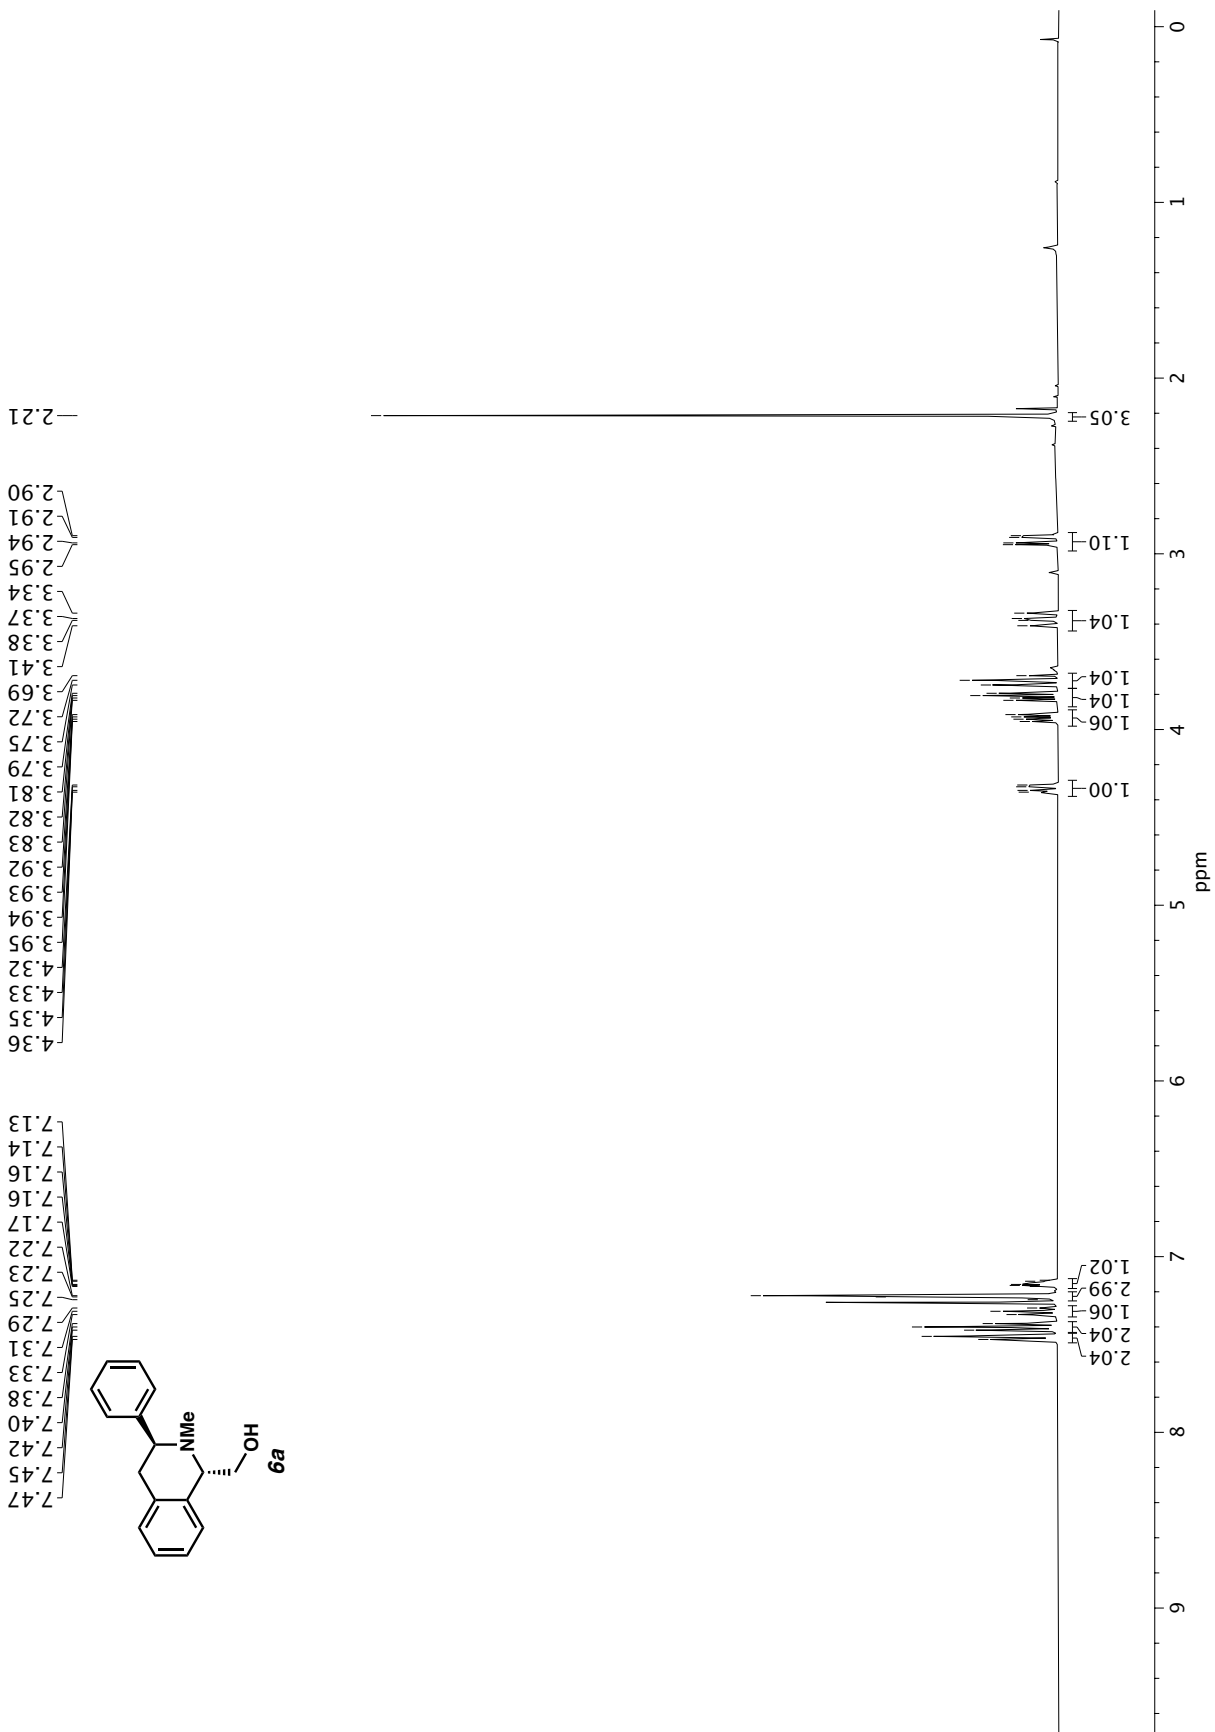

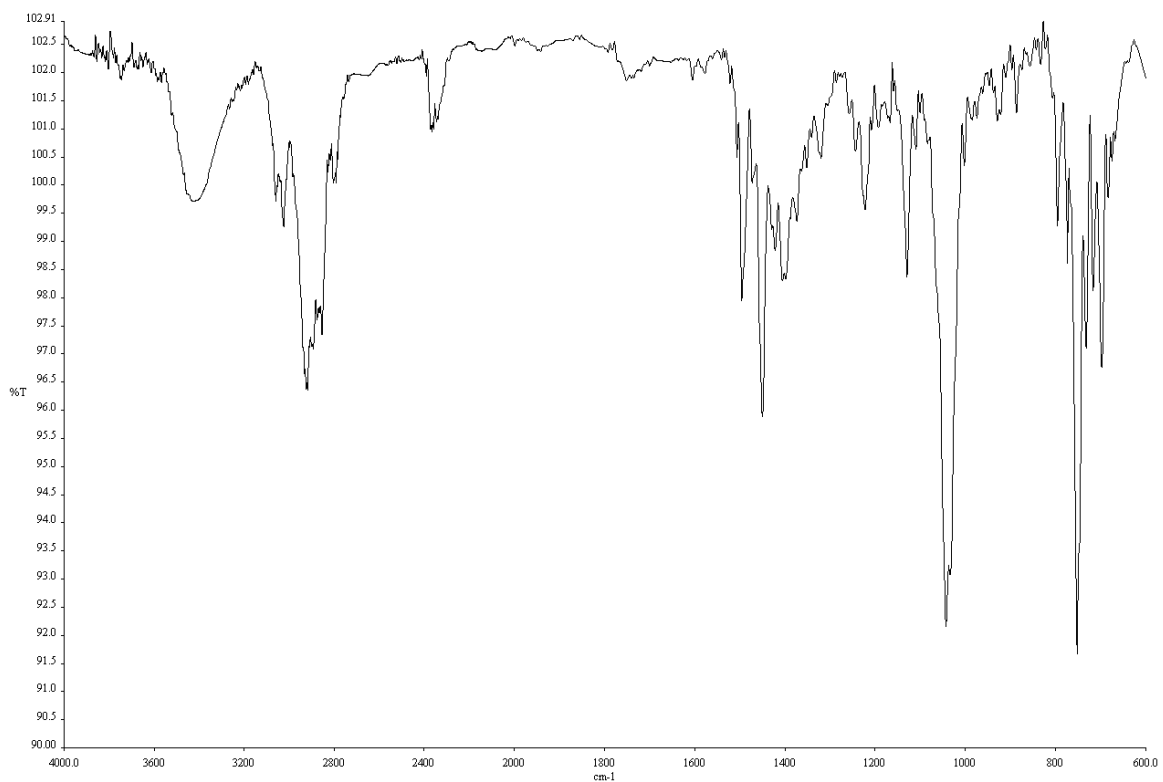

Infrared spectrum (Thin Film, NaCl) of **6a**.

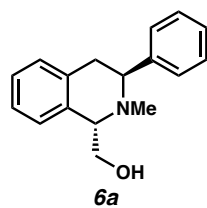

140.9  
134.5  
133.7  
129.5  
128.5  
127.9  
127.8  
127.4  
126.9  
126.7

65.8  
63.4

53.2

35.7

25.1

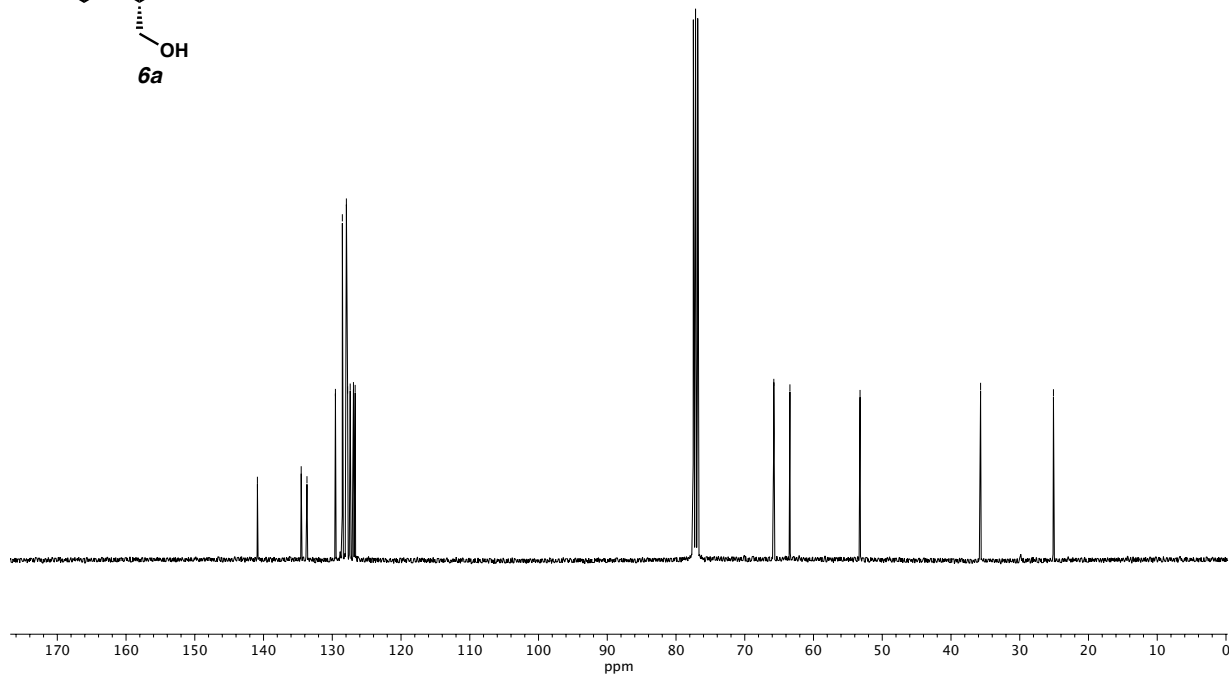

$^{13}\text{C}$  NMR (100 MHz,  $\text{CDCl}_3$ ) of **6a**.

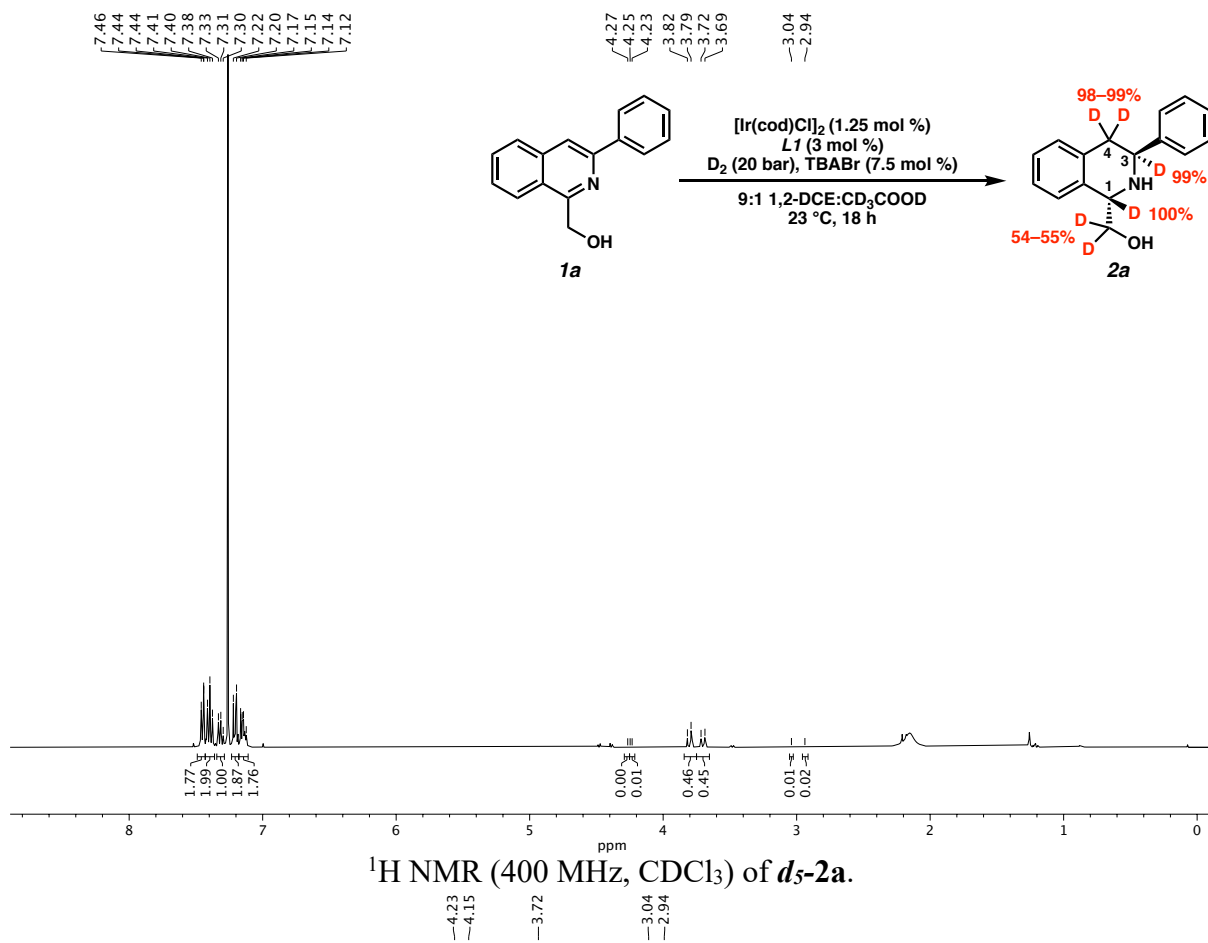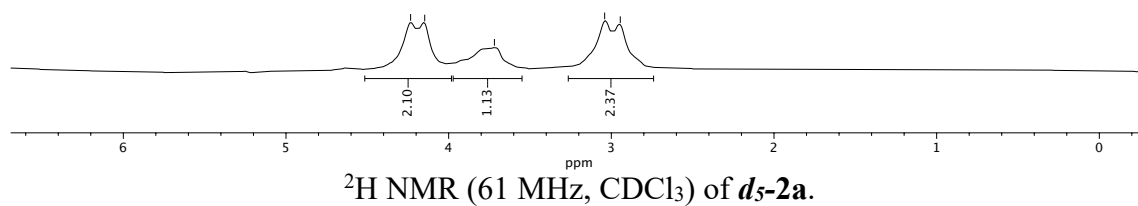

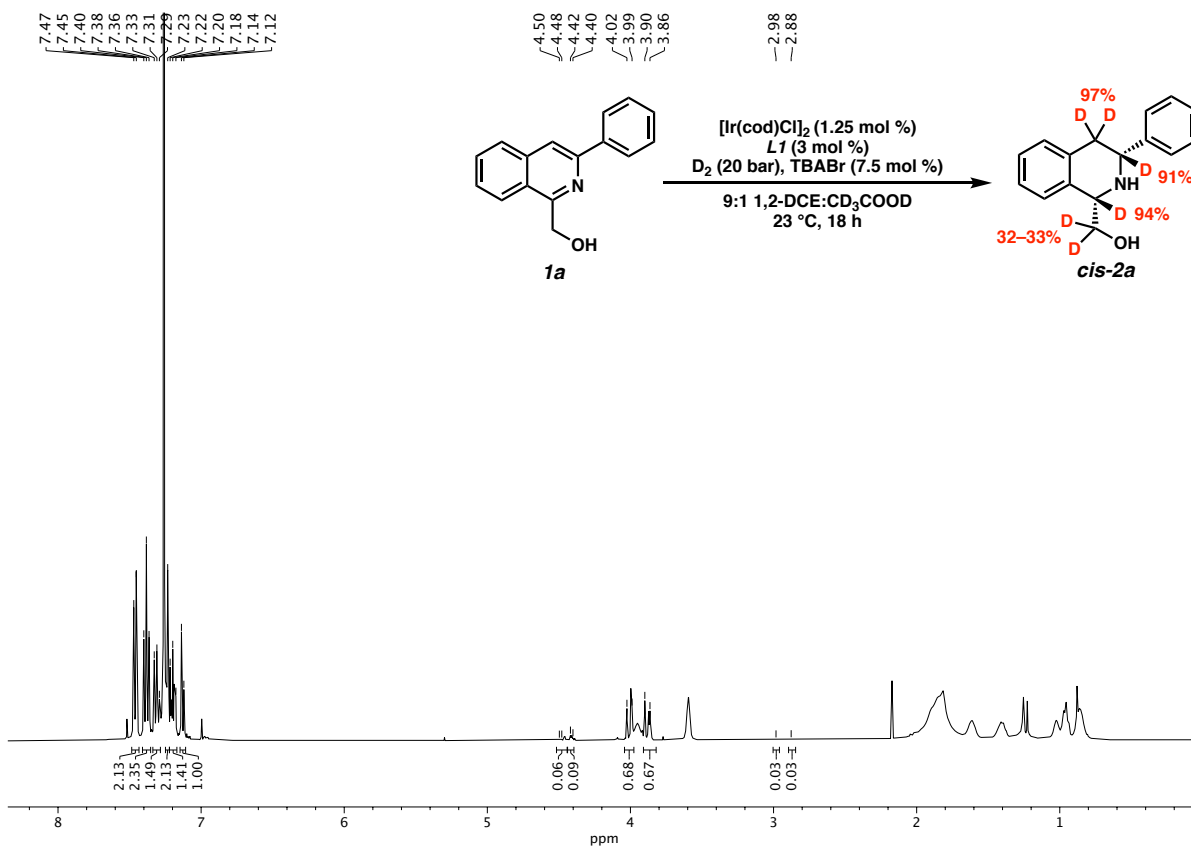

<sup>1</sup>H NMR (400 MHz, CDCl<sub>3</sub>) of *d<sub>n</sub>-cis-2a*.

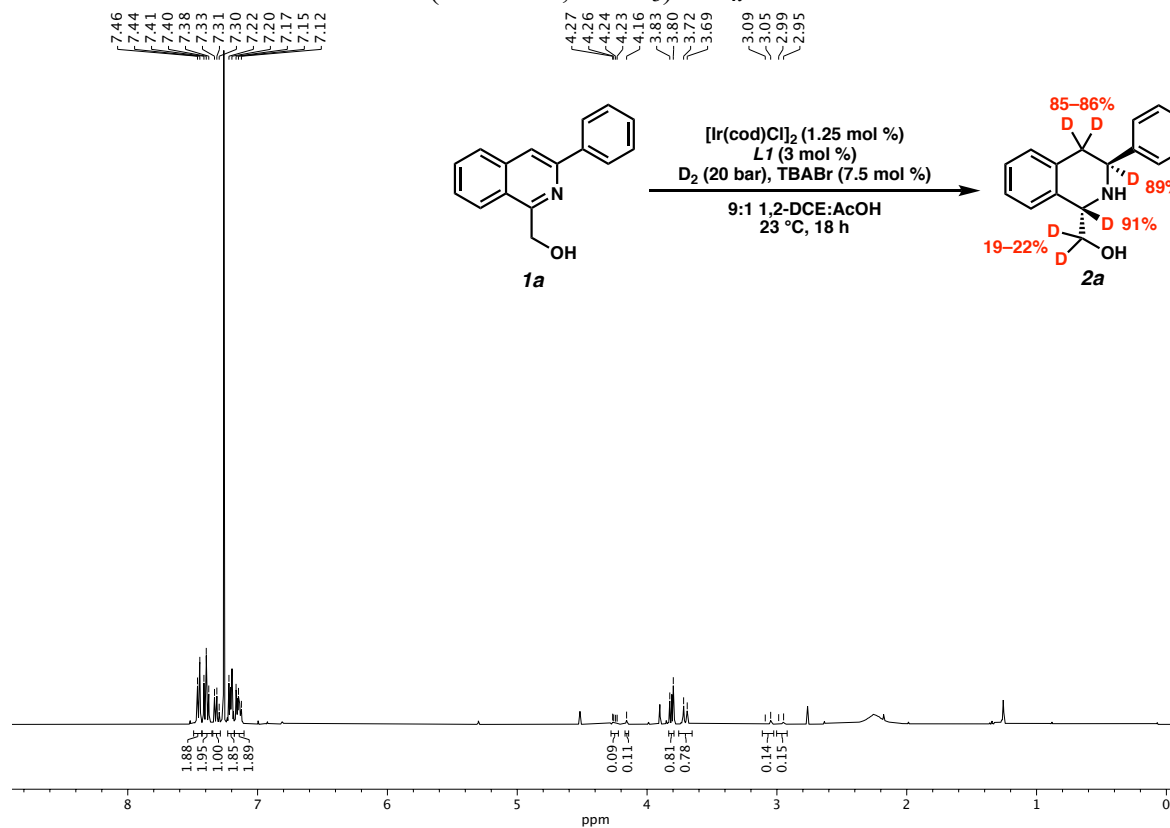

<sup>1</sup>H NMR (400 MHz, CDCl<sub>3</sub>) of *d<sub>n</sub>-2a*.



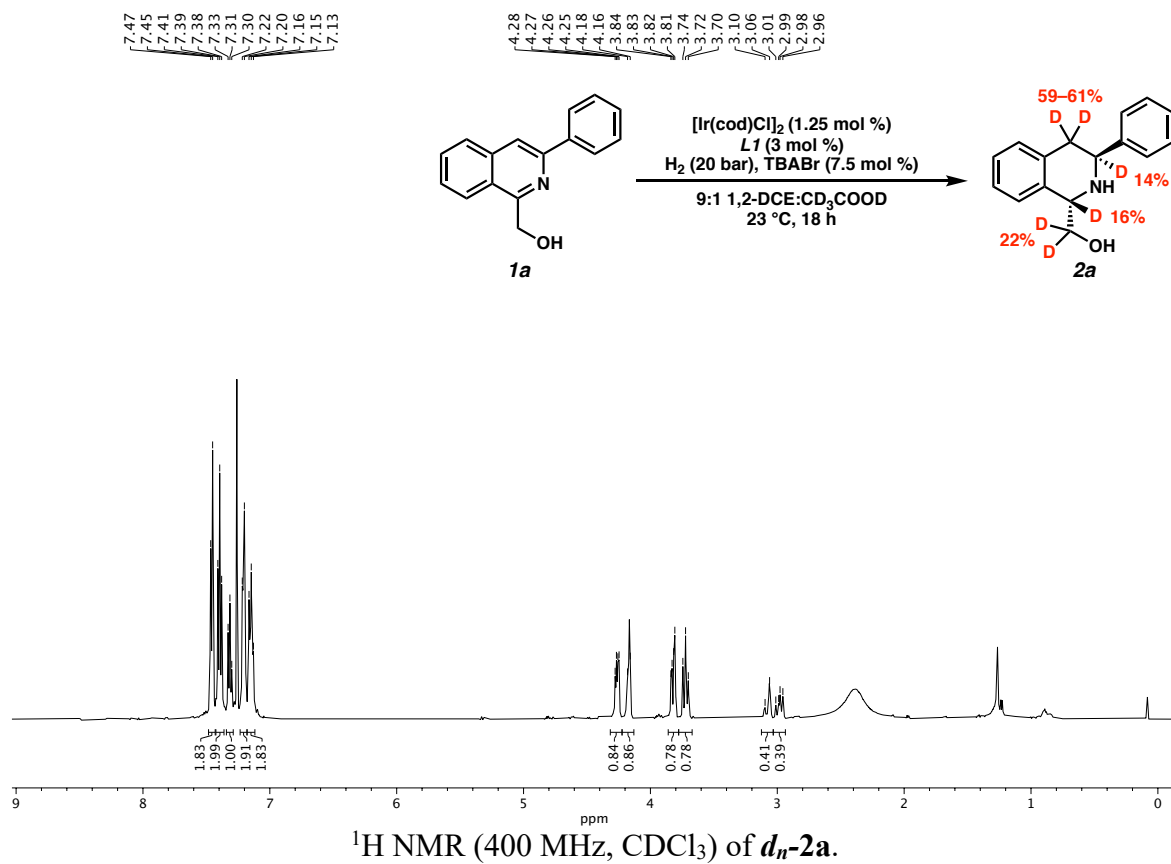

## SFC Traces of Racemic and Enantioenriched Compounds

### Racemic 2a•Cbz

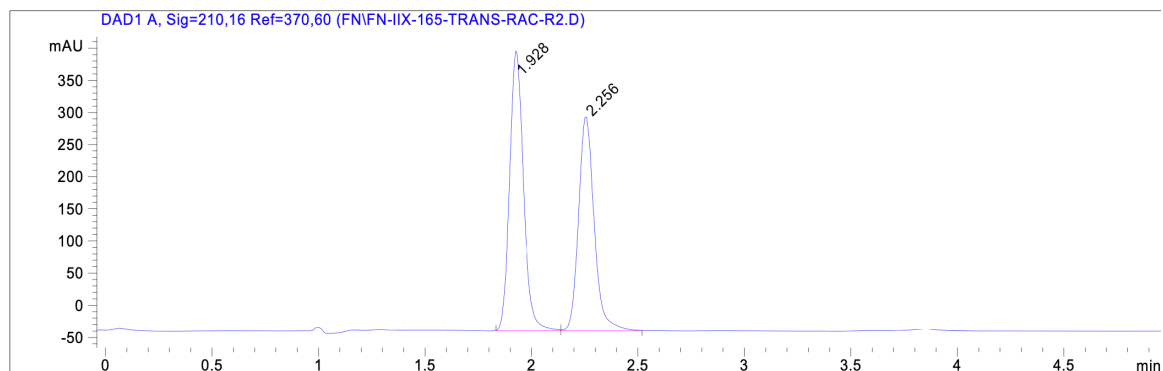

Signal 1: DAD1 A, Sig=210,16 Ref=370,60

| Peak # | RetTime [min] | Type | Width [min] | Area [mAU*s] | Height [mAU] | Area %  |
|--------|---------------|------|-------------|--------------|--------------|---------|
| 1      | 1.928         | BV   | 0.0710      | 1980.20166   | 435.95096    | 53.8603 |
| 2      | 2.256         | VB   | 0.0792      | 1696.34778   | 334.17471    | 46.1397 |

### Enantioenriched 2a•Cbz

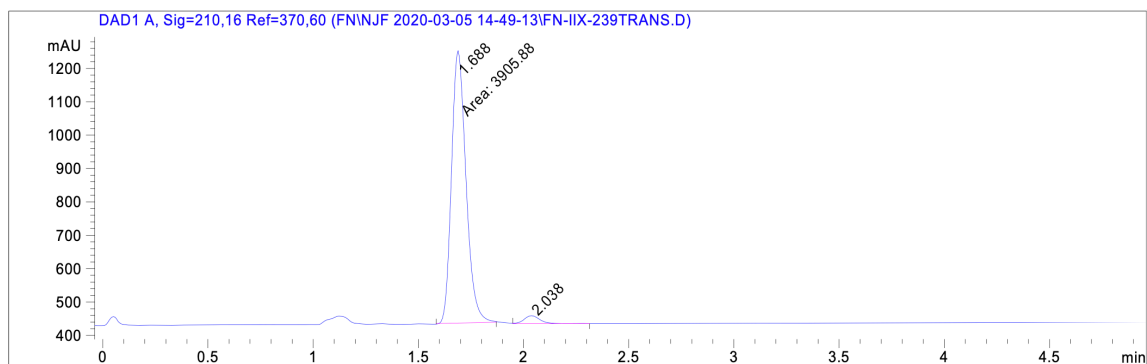

Signal 1: DAD1 A, Sig=210,16 Ref=370,60

| Peak # | RetTime [min] | Type | Width [min] | Area [mAU*s] | Height [mAU] | Area %  |
|--------|---------------|------|-------------|--------------|--------------|---------|
| 1      | 1.688         | MM   | 0.0796      | 3905.88330   | 817.43951    | 96.8437 |
| 2      | 2.038         | VB   | 0.0815      | 127.29790    | 24.16609     | 3.1563  |

### Racemic 4e•Cbz

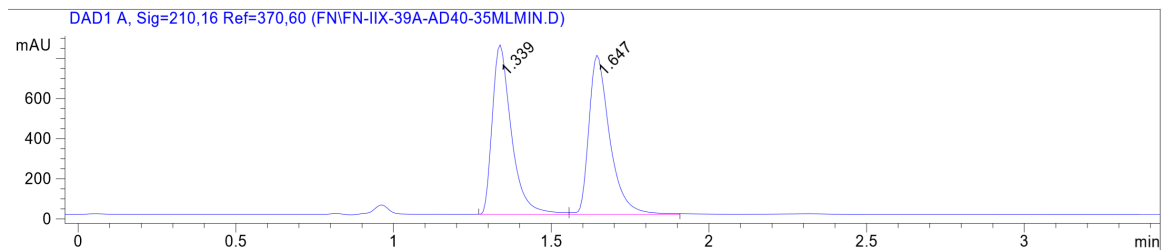

Signal 1: DAD1 A, Sig=210,16 Ref=370,60

| Peak # | RetTime [min] | Type | Width [min] | Area [mAU*s] | Height [mAU] | Area %  |
|--------|---------------|------|-------------|--------------|--------------|---------|
| 1      | 1.339         | BV   | 0.0654      | 3562.84033   | 841.34003    | 49.4402 |
| 2      | 1.647         | VB   | 0.0697      | 3643.52856   | 791.14252    | 50.5598 |

### Enantioenriched 4eCbz

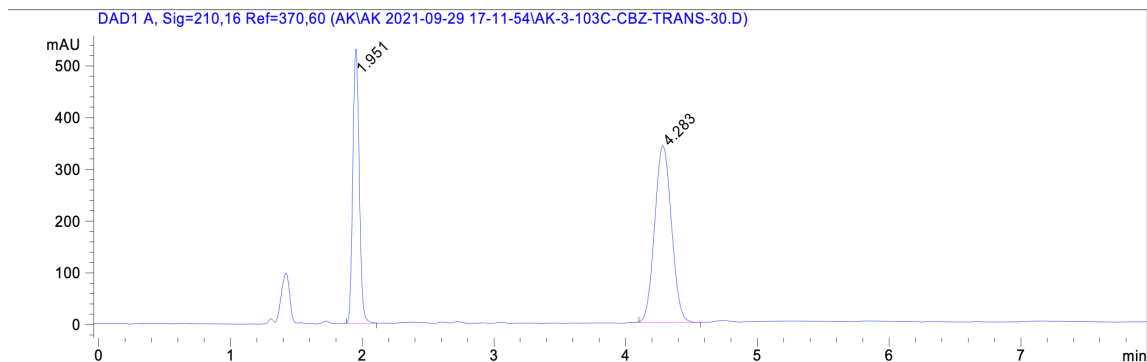

Signal 1: DAD1 A, Sig=210,16 Ref=370,60

| Peak # | RetTime [min] | Type | Width [min] | Area [mAU*s] | Height [mAU] | Area %  |
|--------|---------------|------|-------------|--------------|--------------|---------|
| 1      | 1.951         | BB   | 0.0532      | 1799.63599   | 535.01355    | 37.2214 |
| 2      | 4.283         | BB   | 0.1396      | 3035.31348   | 341.70935    | 62.7786 |

### Racemic 5a

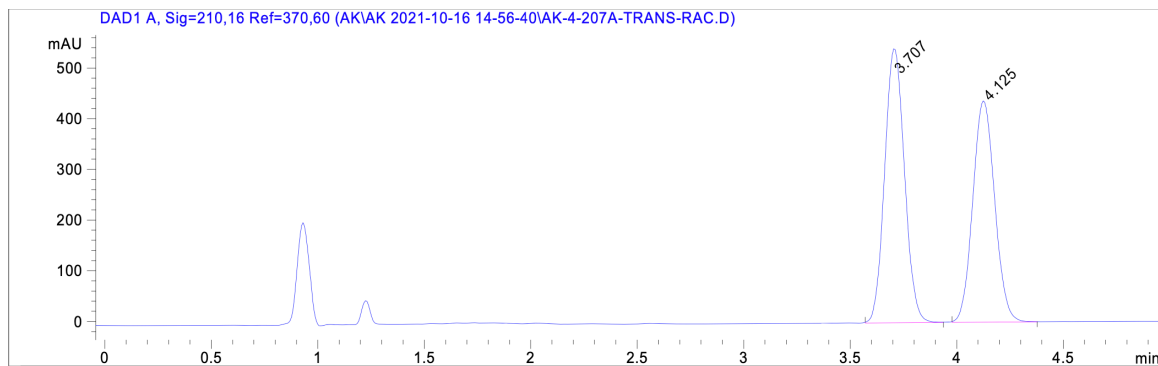

Signal 1: DAD1 A, Sig=210,16 Ref=370,60

| Peak # | RetTime [min] | Type | Width [min] | Area [mAU*s] | Height [mAU] | Area %  |
|--------|---------------|------|-------------|--------------|--------------|---------|
| 1      | 3.707         | BB   | 0.1015      | 3502.39062   | 541.37115    | 52.8660 |
| 2      | 4.125         | BB   | 0.1114      | 3122.64380   | 436.64725    | 47.1340 |

## Enantioenriched 5a

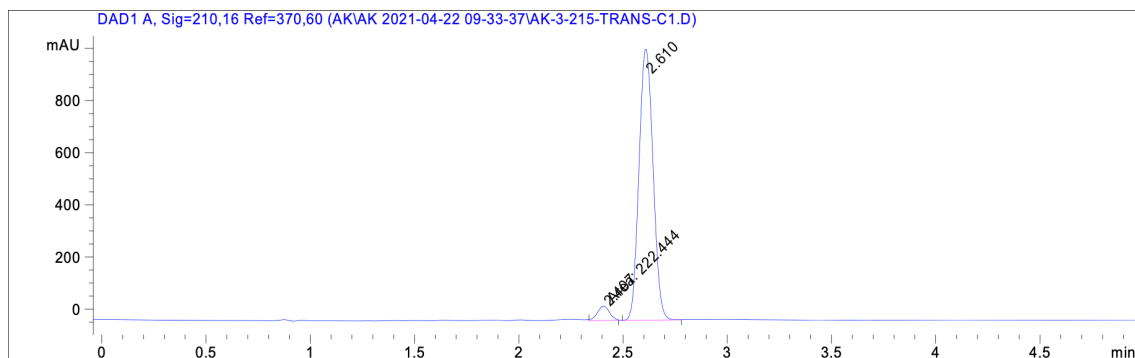

Signal 1: DAD1 A, Sig=210,16 Ref=370,60

| Peak # | RetTime [min] | Type | Width [min] | Area [mAU*s] | Height [mAU] | Area %  |
|--------|---------------|------|-------------|--------------|--------------|---------|
| 1      | 2.407         | MM   | 0.0668      | 222.44351    | 55.51492     | 4.3600  |
| 2      | 2.610         | VB   | 0.0746      | 4879.43848   | 1043.11670   | 95.6400 |

## Racemic 5b

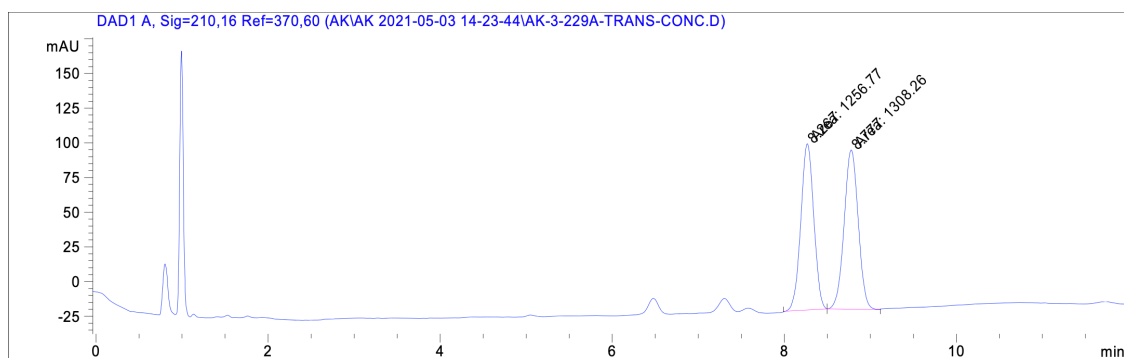

Signal 1: DAD1 A, Sig=210,16 Ref=370,60

| Peak # | RetTime [min] | Type | Width [min] | Area [mAU*s] | Height [mAU] | Area %  |
|--------|---------------|------|-------------|--------------|--------------|---------|
| 1      | 8.267         | MM   | 0.1746      | 1256.77405   | 119.94225    | 48.9963 |
| 2      | 8.777         | MM   | 0.1897      | 1308.26367   | 114.92722    | 51.0037 |

## Enantioenriched 5b

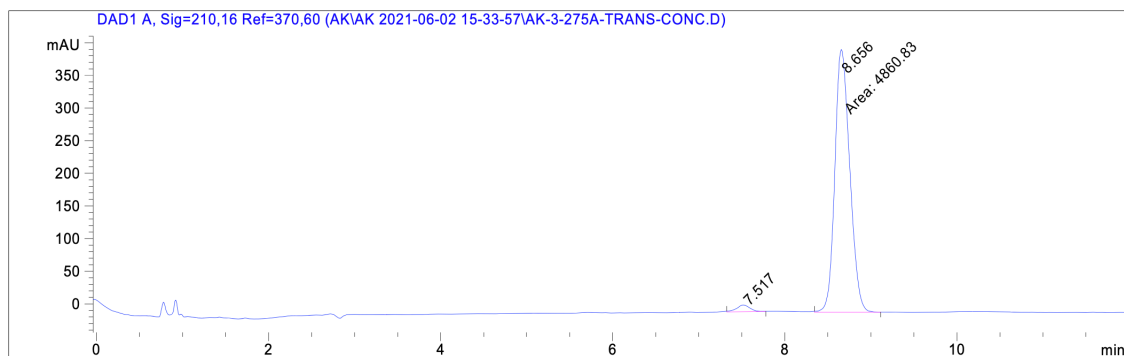

Signal 1: DAD1 A, Sig=210,16 Ref=370,60

| Peak # | RetTime [min] | Type | Width [min] | Area [mAU*s] | Height [mAU] | Area %  |
|--------|---------------|------|-------------|--------------|--------------|---------|
| 1      | 7.517         | BB   | 0.1605      | 109.86375    | 10.29189     | 2.2102  |
| 2      | 8.656         | MM   | 0.2012      | 4860.83008   | 402.59357    | 97.7898 |

## Racemic 5c

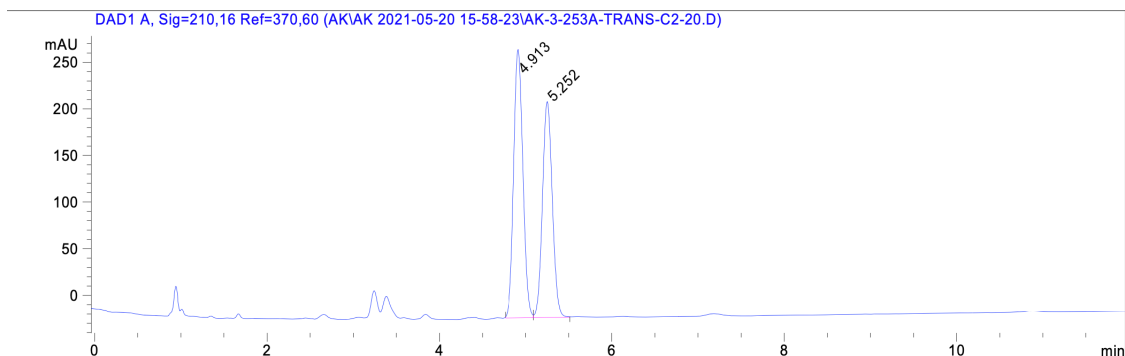

Signal 1: DAD1 A, Sig=210,16 Ref=370,60

| Peak # | RetTime [min] | Type | Width [min] | Area [mAU*s] | Height [mAU] | Area %  |
|--------|---------------|------|-------------|--------------|--------------|---------|
| 1      | 4.913         | BV   | 0.1173      | 2155.09814   | 287.93854    | 53.9109 |
| 2      | 5.252         | VB   | 0.1248      | 1842.42236   | 231.71597    | 46.0891 |

## Enantioenriched 5c

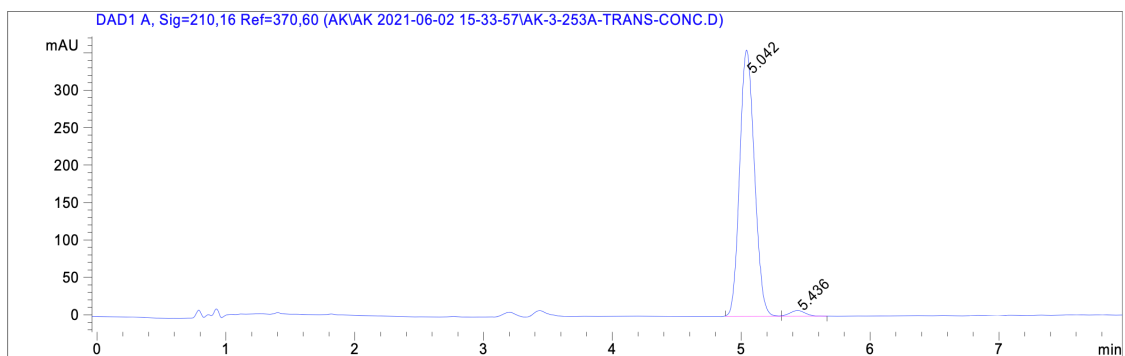

Signal 1: DAD1 A, Sig=210,16 Ref=370,60

| Peak # | RetTime [min] | Type | Width [min] | Area [mAU*s] | Height [mAU] | Area %  |
|--------|---------------|------|-------------|--------------|--------------|---------|
| 1      | 5.042         | BB   | 0.1251      | 2841.96826   | 356.06854    | 97.7926 |
| 2      | 5.436         | BB   | 0.1298      | 64.14865     | 7.64981      | 2.2074  |

## Racemic 5d

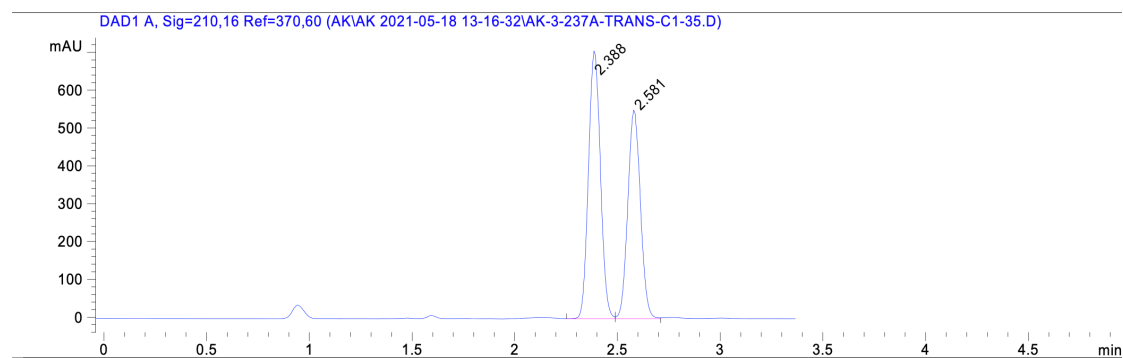

Signal 1: DAD1 A, Sig=210,16 Ref=370,60

| Peak # | RetTime [min] | Type | Width [min] | Area [mAU*s] | Height [mAU] | Area %  |
|--------|---------------|------|-------------|--------------|--------------|---------|
| 1      | 2.388         | VV   | 0.0630      | 2858.31030   | 709.17267    | 54.7573 |
| 2      | 2.581         | VV   | 0.0679      | 2361.65356   | 551.95624    | 45.2427 |

## Enantioenriched 5d

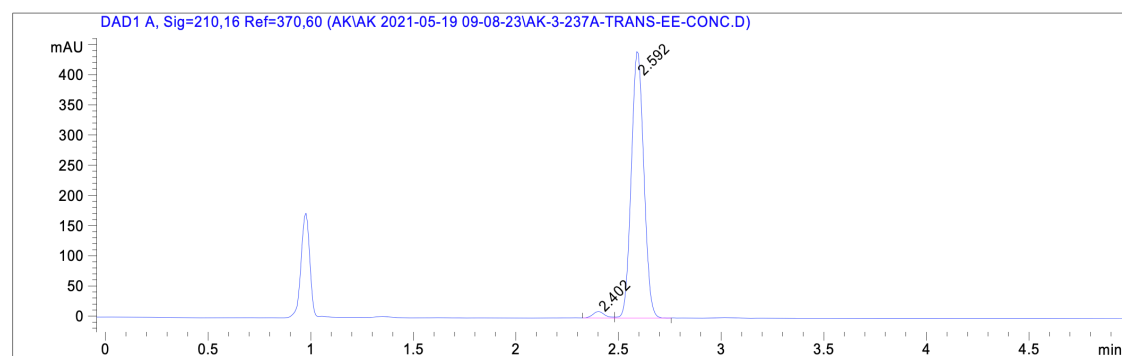

Signal 1: DAD1 A, Sig=210,16 Ref=370,60

| Peak # | RetTime [min] | Type | Width [min] | Area [mAU*s] | Height [mAU] | Area %  |
|--------|---------------|------|-------------|--------------|--------------|---------|
| 1      | 2.402         | BV   | 0.0636      | 44.24749     | 10.85165     | 2.3018  |
| 2      | 2.592         | VB   | 0.0654      | 1878.07214   | 443.49234    | 97.6982 |

## Racemic 5e

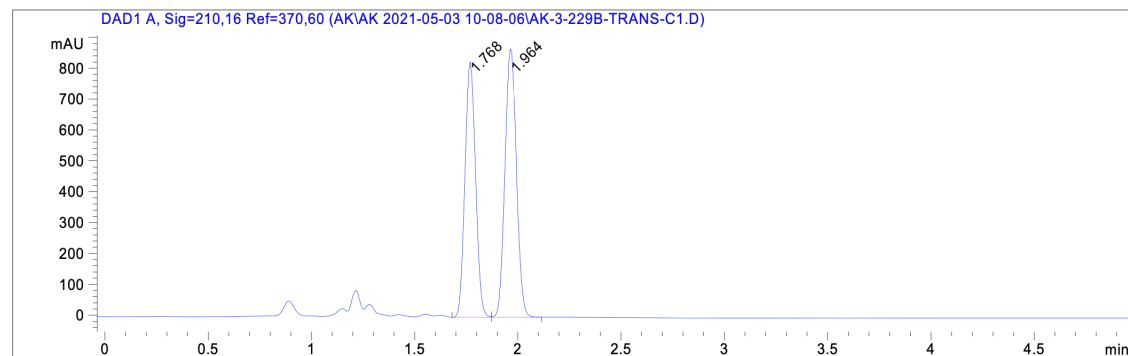

Signal 1: DAD1 A, Sig=210,16 Ref=370,60

| Peak # | RetTime [min] | Type | Width [min] | Area [mAU*s] | Height [mAU] | Area %  |
|--------|---------------|------|-------------|--------------|--------------|---------|
| 1      | 1.768         | VV   | 0.0557      | 2954.45508   | 827.37811    | 46.4989 |
| 2      | 1.964         | VB   | 0.0614      | 3399.35913   | 872.99890    | 53.5011 |

## Enantioenriched **5e**

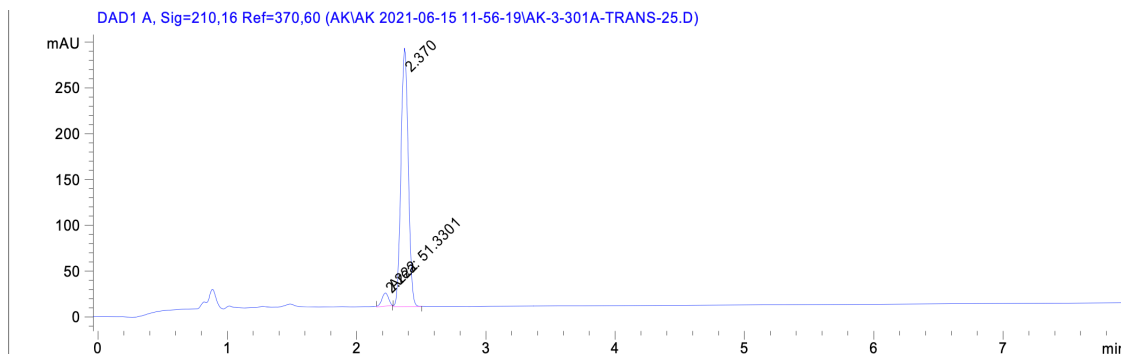

Signal 1: DAD1 A, Sig=210,16 Ref=370,60

| Peak # | RetTime [min] | Type | Width [min] | Area [mAU*s] | Height [mAU] | Area %  |
|--------|---------------|------|-------------|--------------|--------------|---------|
| 1      | 2.222         | MM   | 0.0589      | 51.33008     | 14.52952     | 4.4192  |
| 2      | 2.370         | VB   | 0.0618      | 1110.19238   | 282.54547    | 95.5808 |

## Racemic **5f**

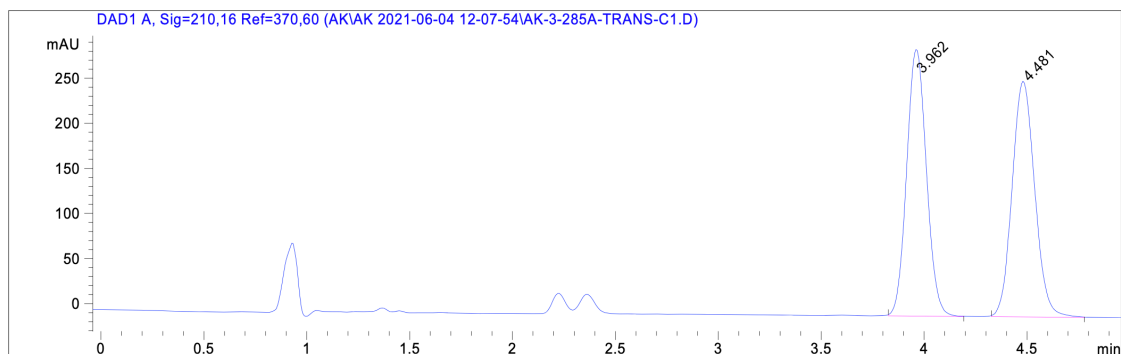

Signal 1: DAD1 A, Sig=210,16 Ref=370,60

| Peak # | RetTime [min] | Type | Width [min] | Area [mAU*s] | Height [mAU] | Area %  |
|--------|---------------|------|-------------|--------------|--------------|---------|
| 1      | 3.962         | BB   | 0.1038      | 1974.61340   | 296.26938    | 49.6855 |
| 2      | 4.481         | BB   | 0.1192      | 1999.60779   | 261.47470    | 50.3145 |

## Enantioenriched **5f**

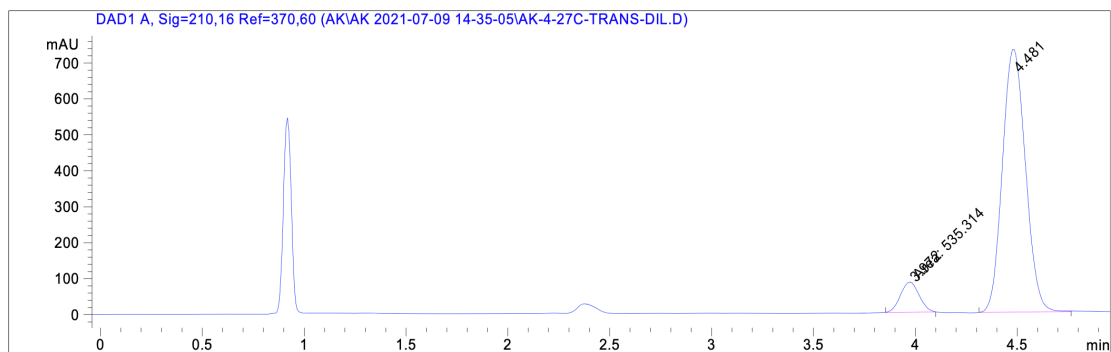

Signal 1: DAD1 A, Sig=210,16 Ref=370,60

| Peak # | RetTime [min] | Type | Width [min] | Area [mAU*s] | Height [mAU] | Area %  |
|--------|---------------|------|-------------|--------------|--------------|---------|
| 1      | 3.972         | MM   | 0.1059      | 535.31372    | 84.21969     | 8.5046  |
| 2      | 4.481         | BB   | 0.1237      | 5759.05176   | 732.42853    | 91.4954 |

## Racemic **5g**

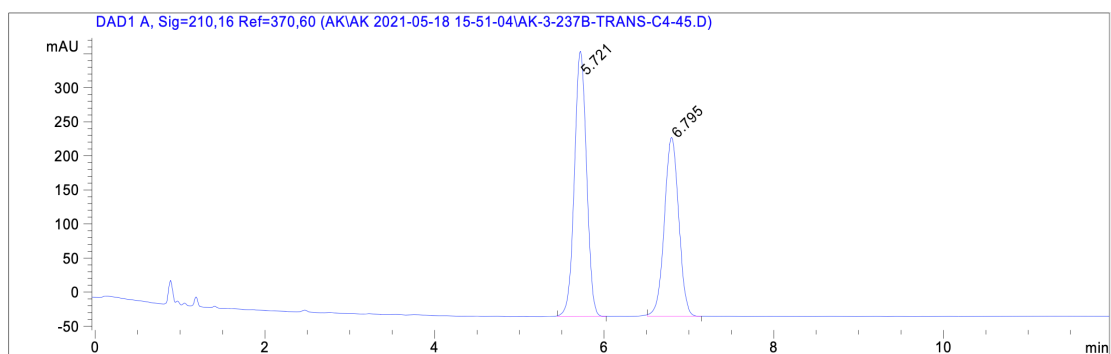

Signal 1: DAD1 A, Sig=210,16 Ref=370,60

| Peak # | RetTime [min] | Type | Width [min] | Area [mAU*s] | Height [mAU] | Area %  |
|--------|---------------|------|-------------|--------------|--------------|---------|
| 1      | 5.721         | BB   | 0.1560      | 3871.54150   | 389.45190    | 55.6158 |
| 2      | 6.795         | BB   | 0.1833      | 3089.68970   | 262.50827    | 44.3842 |

## Enantioenriched **5g**

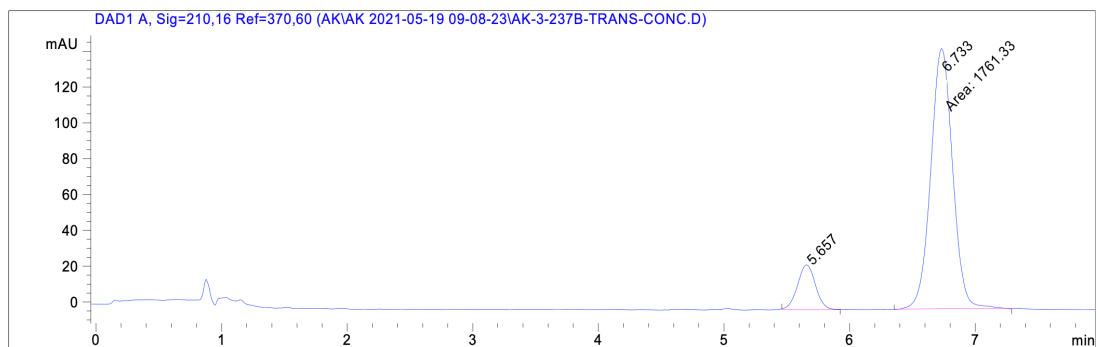



Signal 1: DAD1 A, Sig=210,16 Ref=370,60

| Peak # | RetTime [min] | Type | Width [min] | Area [mAU*s] | Height [mAU] | Area %  |
|--------|---------------|------|-------------|--------------|--------------|---------|
| 1      | 5.657         | BB   | 0.1548      | 250.86575    | 25.05193     | 12.4672 |
| 2      | 6.733         | MM   | 0.2019      | 1761.33459   | 145.37187    | 87.5328 |

## Racemic 5h

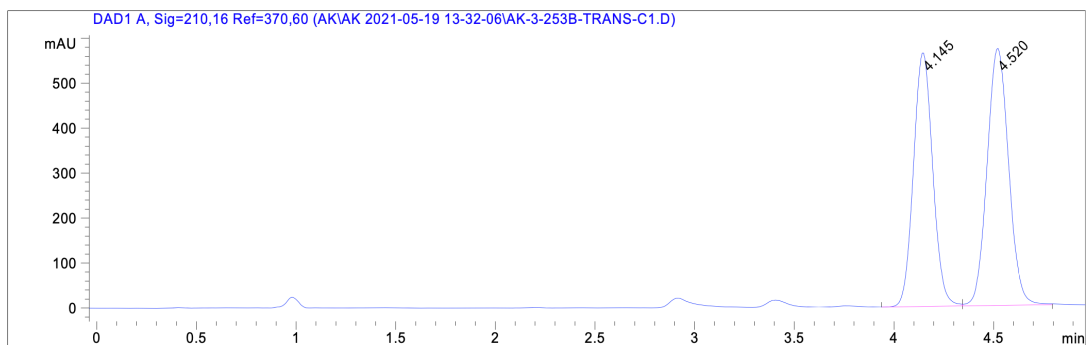

Signal 1: DAD1 A, Sig=210,16 Ref=370,60

| Peak # | RetTime [min] | Type | Width [min] | Area [mAU*s] | Height [mAU] | Area %  |
|--------|---------------|------|-------------|--------------|--------------|---------|
| 1      | 4.145         | VV   | 0.1063      | 3792.93726   | 565.46350    | 46.8336 |
| 2      | 4.520         | VB   | 0.1178      | 4305.81396   | 572.19220    | 53.1664 |

## Enantioenriched 5h

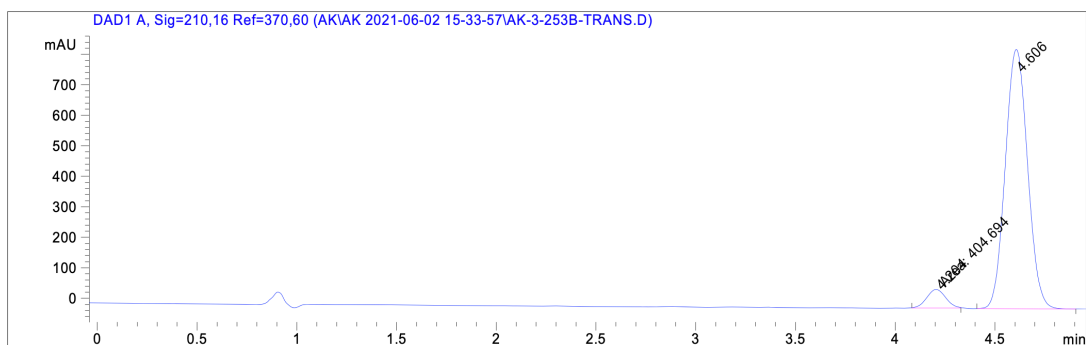

Signal 1: DAD1 A, Sig=210,16 Ref=370,60

| Peak # | RetTime [min] | Type | Width [min] | Area [mAU*s] | Height [mAU] | Area %  |
|--------|---------------|------|-------------|--------------|--------------|---------|
| 1      | 4.204         | MM   | 0.1100      | 404.69440    | 61.30987     | 5.7254  |
| 2      | 4.606         | VB   | 0.1253      | 6663.66309   | 851.73578    | 94.2746 |

## Racemic 5i

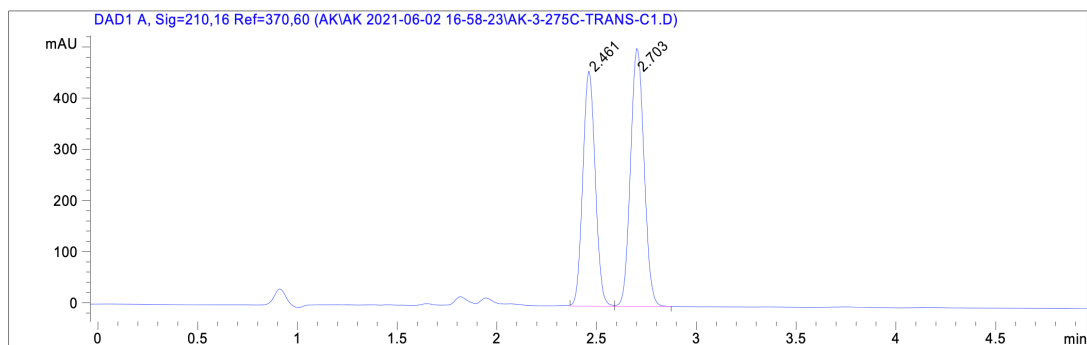

Signal 1: DAD1 A, Sig=210,16 Ref=370,60

| Peak # | RetTime [min] | Type | Width [min] | Area [mAU*s] | Height [mAU] | Area %  |
|--------|---------------|------|-------------|--------------|--------------|---------|
| 1      | 2.461         | BV   | 0.0685      | 1989.77161   | 459.68130    | 45.4962 |
| 2      | 2.703         | VB   | 0.0750      | 2383.71631   | 505.36072    | 54.5038 |

## Enantioenriched 5i

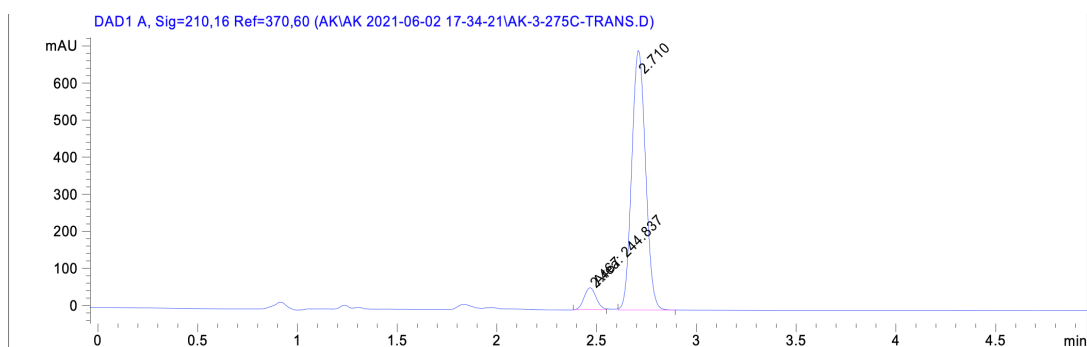

Signal 1: DAD1 A, Sig=210,16 Ref=370,60

| Peak # | RetTime [min] | Type | Width [min] | Area [mAU*s] | Height [mAU] | Area %  |
|--------|---------------|------|-------------|--------------|--------------|---------|
| 1      | 2.467         | MM   | 0.0691      | 244.83684    | 59.04865     | 6.7569  |
| 2      | 2.710         | BB   | 0.0762      | 3378.64526   | 701.71271    | 93.2431 |

## Racemic 5j

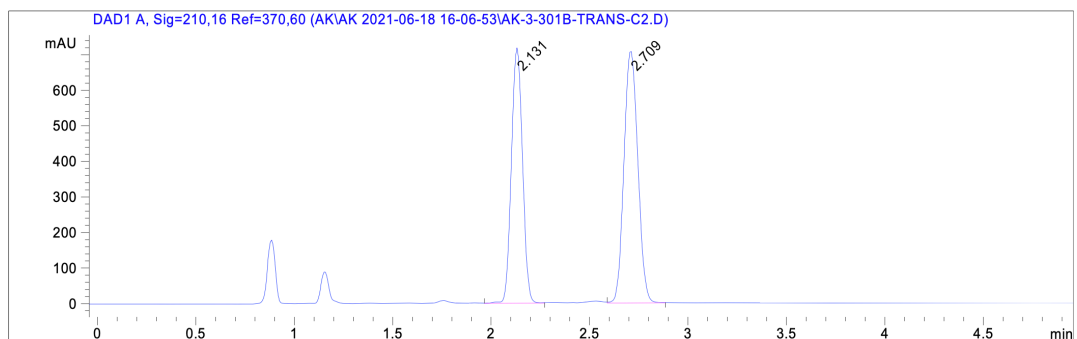

Signal 1: DAD1 A, Sig=210,16 Ref=370,60

| Peak # | RetTime [min] | Type | Width [min] | Area [mAU*s] | Height [mAU] | Area %  |
|--------|---------------|------|-------------|--------------|--------------|---------|
| 1      | 2.131         | VB   | 0.0637      | 2812.75122   | 717.95227    | 44.7721 |
| 2      | 2.709         | VB   | 0.0771      | 3469.62817   | 709.34265    | 55.2279 |

## Enantioenriched 5j

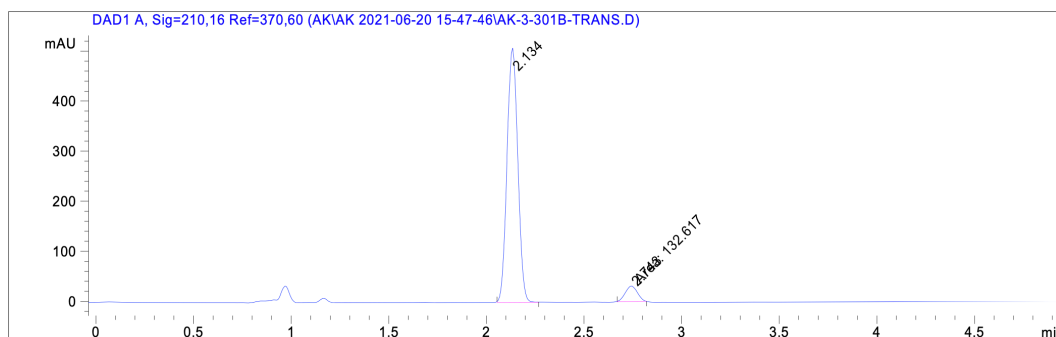

Signal 1: DAD1 A, Sig=210,16 Ref=370,60

| Peak # | RetTime [min] | Type | Width [min] | Area [mAU*s] | Height [mAU] | Area %  |
|--------|---------------|------|-------------|--------------|--------------|---------|
| 1      | 2.134         | BB   | 0.0607      | 1950.11230   | 508.64514    | 93.6326 |
| 2      | 2.743         | MM   | 0.0713      | 132.61661    | 31.00001     | 6.3674  |

## Racemic 5k

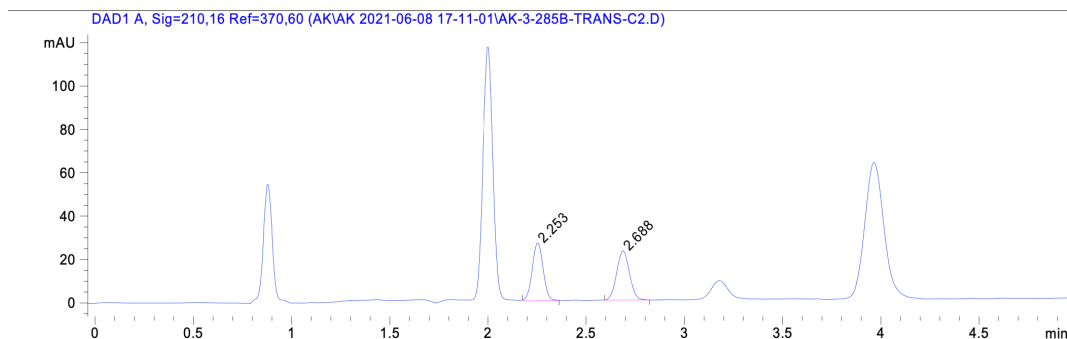

Signal 1: DAD1 A, Sig=210,16 Ref=370,60

| Peak # | RetTime [min] | Type | Width [min] | Area [mAU*s] | Height [mAU] | Area %  |
|--------|---------------|------|-------------|--------------|--------------|---------|
| 1      | 2.253         | BB   | 0.0608      | 102.34369    | 26.65138     | 49.9903 |
| 2      | 2.688         | BB   | 0.0704      | 102.38338    | 22.78030     | 50.0097 |

## Enantioenriched 5k

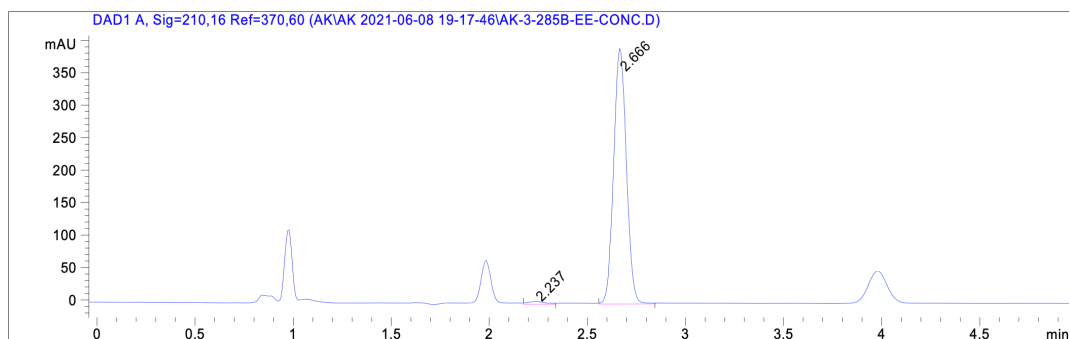

Signal 1: DAD1 A, Sig=210,16 Ref=370,60

| Peak # | RetTime [min] | Type | Width [min] | Area [mAU*s] | Height [mAU] | Area %  |
|--------|---------------|------|-------------|--------------|--------------|---------|
| 1      | 2.237         | BB   | 0.0852      | 28.60090     | 4.68965      | 1.5821  |
| 2      | 2.666         | BB   | 0.0707      | 1779.20972   | 393.78354    | 98.4179 |

## Racemic 5l

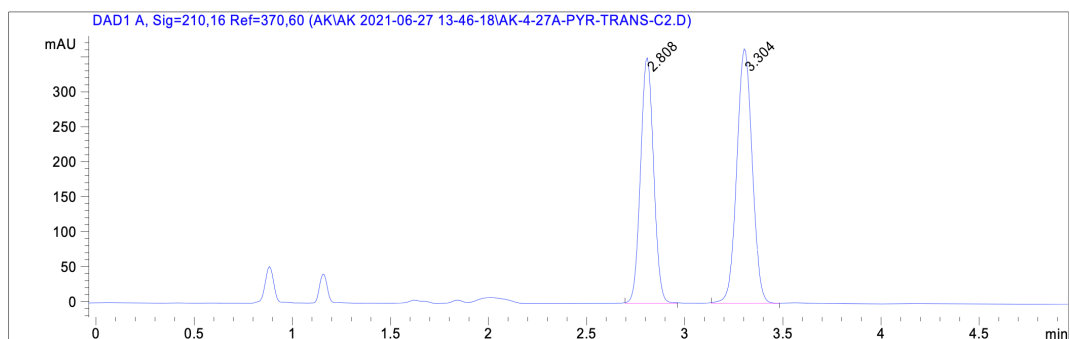

Signal 1: DAD1 A, Sig=210,16 Ref=370,60

| Peak # | RetTime [min] | Type | Width [min] | Area [mAU*s] | Height [mAU] | Area %  |
|--------|---------------|------|-------------|--------------|--------------|---------|
| 1      | 2.808         | BB   | 0.0721      | 1630.49646   | 351.82343    | 44.9502 |
| 2      | 3.304         | BB   | 0.0859      | 1996.83997   | 364.45786    | 55.0498 |

## Enantioenriched 5l

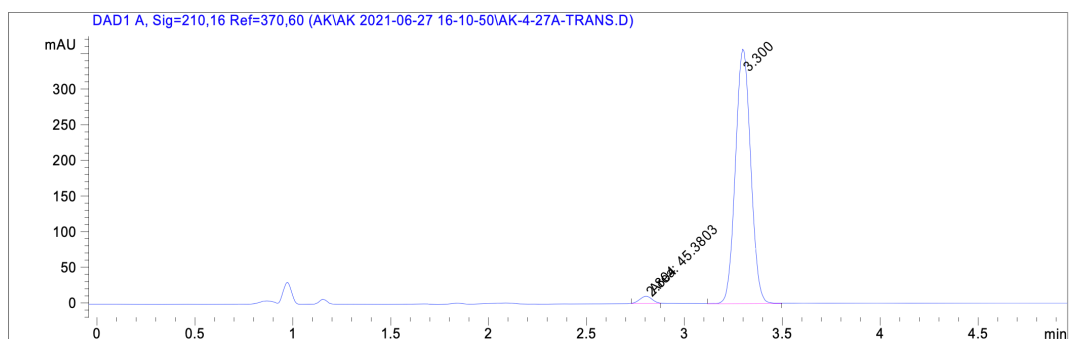

Signal 1: DAD1 A, Sig=210,16 Ref=370,60

| Peak # | RetTime [min] | Type | Width [min] | Area [mAU*s] | Height [mAU] | Area %  |
|--------|---------------|------|-------------|--------------|--------------|---------|
| 1      | 2.804         | MM   | 0.0740      | 45.38032     | 10.21401     | 2.2827  |
| 2      | 3.300         | BB   | 0.0853      | 1942.64270   | 357.85828    | 97.7173 |

## Racemic 5m

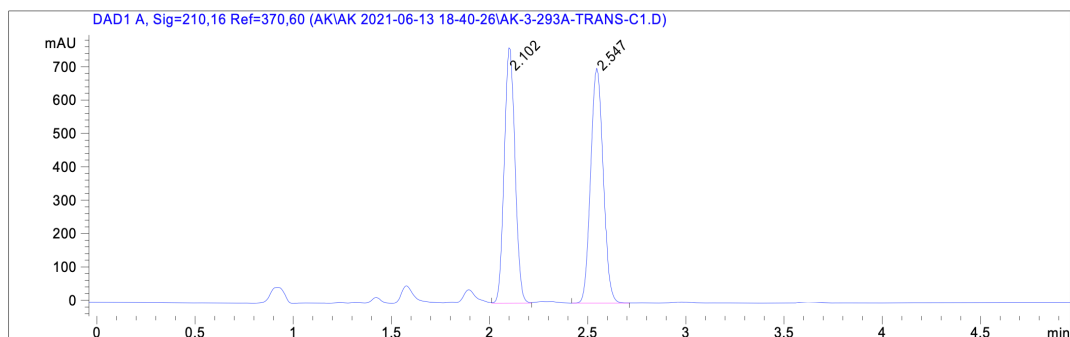

Signal 1: DAD1 A, Sig=210,16 Ref=370,60

| Peak # | RetTime [min] | Type | Width [min] | Area [mAU*s] | Height [mAU] | Area %  |
|--------|---------------|------|-------------|--------------|--------------|---------|
| 1      | 2.102         | VV   | 0.0601      | 2910.37720   | 769.22076    | 48.1925 |
| 2      | 2.547         | VB   | 0.0699      | 3128.68921   | 703.73804    | 51.8075 |

## Enantioenriched 5m

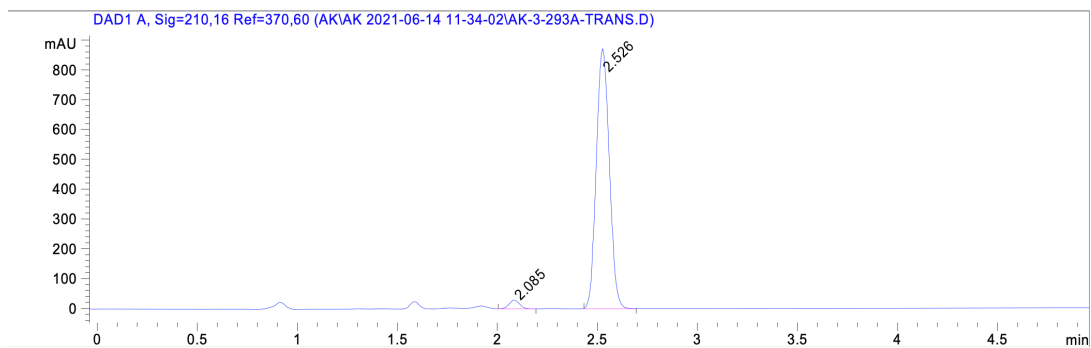

Signal 1: DAD1 A, Sig=210,16 Ref=370,60

| Peak # | RetTime [min] | Type | Width [min] | Area [mAU*s] | Height [mAU] | Area %  |
|--------|---------------|------|-------------|--------------|--------------|---------|
| 1      | 2.085         | VB   | 0.0584      | 106.31534    | 29.28596     | 2.6213  |
| 2      | 2.526         | BB   | 0.0708      | 3949.48437   | 872.81018    | 97.3787 |

## Racemic **5n**

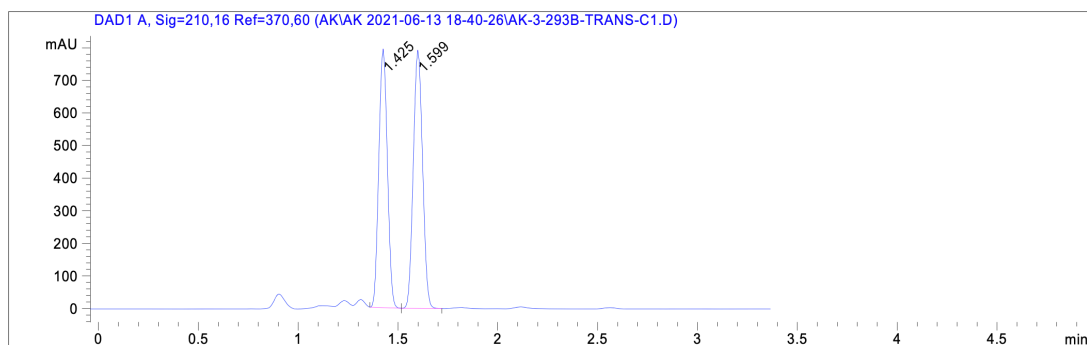

Signal 1: DAD1 A, Sig=210,16 Ref=370,60

| Peak # | RetTime [min] | Type | Width [min] | Area [mAU*s] | Height [mAU] | Area %  |
|--------|---------------|------|-------------|--------------|--------------|---------|
| 1      | 1.425         | VV   | 0.0489      | 2372.91919   | 793.90009    | 48.1444 |
| 2      | 1.599         | VB   | 0.0516      | 2555.83887   | 792.44293    | 51.8556 |

## Enantioenriched **5n**

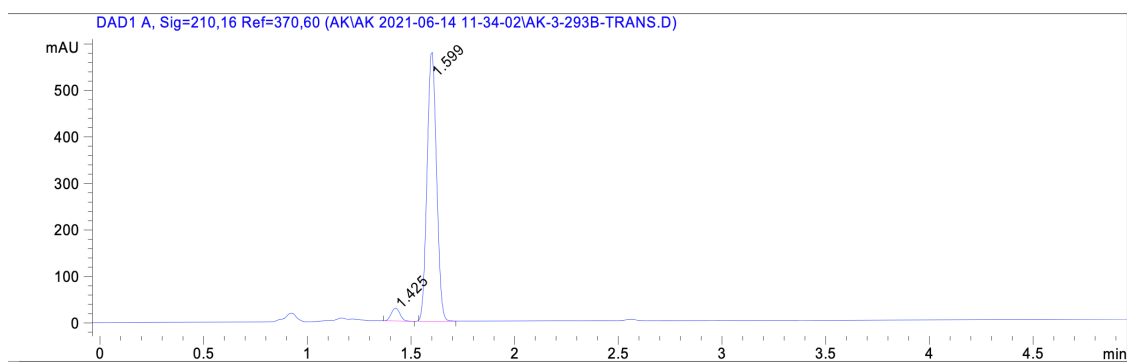

Signal 1: DAD1 A, Sig=210,16 Ref=370,60

| Peak # | RetTime [min] | Type | Width [min] | Area [mAU*s] | Height [mAU] | Area %  |
|--------|---------------|------|-------------|--------------|--------------|---------|
| 1      | 1.425         | BB   | 0.0455      | 79.36908     | 27.67383     | 4.1301  |
| 2      | 1.599         | BB   | 0.0489      | 1842.37402   | 583.17084    | 95.8699 |
